# Supplementary material
Source: publisher figshare collection journal article supplement (https://acs.figshare.com/ndownloader/files/9474898)
Supplement: Supplementary file 1 [file 9474898]

#=======================================================================
data_global
#=======================================================================

_audit_creation_method                   'Jana2006 Version : 12/02/2015'


# 1. PROCESSING SUMMARY (IUCr Office Use Only)

_journal_date_recd_electronic            ?
_journal_date_to_coeditor                ?
_journal_date_from_coeditor              ?
_journal_date_accepted                   ?
_journal_date_printers_first             ?
_journal_date_printers_final             ?
_journal_date_proofs_out                 ?
_journal_date_proofs_in                  ?
_journal_coeditor_name                   ?
_journal_coeditor_code                   ?
_journal_coeditor_notes
; ?
;
_journal_techeditor_code                 ?
_journal_paper_category                  ?
_journal_techeditor_notes
; ?
;
_journal_coden_ASTM                      ?
_journal_name_full                       'Acta Crystallographica Section C'
_journal_year                            ?
_journal_volume                          ?
_journal_issue                           ?
_journal_page_first                      ?
_journal_page_last                       ?
_journal_suppl_publ_number               ?
_journal_suppl_publ_pages                ?

#=======================================================================

# 2. SUBMISSION DETAILS

_publ_contact_author_name                'Aleksandra A. Savina'
_publ_contact_author_address
; 
Baikal Institute of Nature Management, 
Siberian Branch, Russian Academy of Sciences, 
Sakhyanova St. 6, Ulan-Ude, 
670047 Buryat Republic, Russia
;
_publ_contact_author_email               Alex551112@mail.ru
_publ_contact_author_fax                 ?
_publ_contact_author_phone               ?

_publ_requested_journal                  'Chemistry of Materials'
_publ_requested_category                 ?

_publ_contact_letter
; ?
;

#=======================================================================

# 3. TITLE AND AUTHOR LIST

_publ_section_title
; New Solid Electrolyte Na9Al(MoO4)6 :  Structure and Na+ Ion Conductivity
;
_publ_section_title_footnote
; ?
;
loop_
    _publ_author_name
    _publ_author_address
    'Savina, Aleksandra A.'
;     Baikal Institute of Nature Management, 
      Siberian Branch, Russian Academy of Sciences, 
      Sakhyanova St. 6, Ulan-Ude, 
      670047 Buryat Republic, Russia
;
    'Morozov, Vladimir A.'
;     Department of Chemistry, 
      Moscow State University, 119899, Moscow, Russia
;
    'Buzlukov, Anton L.'
;     Institute of Metal Physics, Ural Branch, 
      Russian Academy of Science, 
      S. Kovalevskaya St. 18, 620137 Ekaterinburg, Russia
;
    'Arapova,Irina Yu.'
;     Institute of Metal Physics, Ural Branch, 
      Russian Academy of Science, 
      S. Kovalevskaya St. 18, 620137 Ekaterinburg, Russia
;
    'Stefanovich, Sergey Yu.'
;     Department of Chemistry, 
      Moscow State University, 119899, Moscow, Russia
;
    'Baklanova, Yana V.'
;     Institute of Solid State Chemistry, 
      Ural Branch, Russian Academy of Science, 
      Pervomayskaya St. 91, 620990 Ekaterinburg, Russia
;
    'Denisova, Tatiana A.'
;     Institute of Solid State Chemistry, 
      Ural Branch, Russian Academy of Science, 
      Pervomayskaya St. 91, 620990 Ekaterinburg, Russia
;
    'Medvedeva, Nadezhda I. '
;     Institute of Solid State Chemistry, 
      Ural Branch, Russian Academy of Science, 
      Pervomayskaya St. 91, 620990 Ekaterinburg, Russia
;
    'Bardet, Michel'
;     CEA, INAC, MEM/LRM, F-38054 Grenoble, France
;
    'Hadermann, Joke'
;     EMAT, University of Antwerp, Groenenborgerlaan 171, Belgium B-2020
;
    'Lazoryak, Bogdan I.'
;     Department of Chemistry, 
      Moscow State University, 119899, Moscow, Russia
;
    'Khaikina, Elena G.'
;     Baikal Institute of Nature Management, 
      Siberian Branch, Russian Academy of Sciences, 
      Sakhyanova St. 6, Ulan-Ude, 
      670047 Buryat Republic, Russia
;

#=======================================================================

# 4. TEXT

_publ_section_synopsis
; ?
;
_publ_section_abstract
; ?
;
_publ_section_comment
; ?
;
_publ_section_introduction
; ?
;
_publ_section_experimental
; ?
;
_publ_section_exptl_prep
; ?
;
_publ_section_exptl_refinement
; ?
;
_publ_section_exptl_solution
; ?
;
_publ_section_discussion
; ?
;
_publ_section_acknowledgements
; ?
;
_publ_section_references
;
Petricek, V., Dusek, M. & Palatinus L. (2014). Z. Kristallogr. 229(5), 345-352.

Palatinus L. & Chapuis G. (2007). J. Appl. Cryst. 40, 786-790.

# enable this reference if Diamond ver. 2 was used for visualization
#Brandenburg, K. (1999). DIAMOND. Version. 2.1c.
#Crystal Impact GbR, Bonn, Germany.

# enable this reference if Diamond ver. 3 was used for visualization
#Brandenburg, K. & Putz, H. (2005). DIAMOND Version 3.
#Crystal Impact GbR, Postfach 1251, D-53002 Bonn, Germany.

# enable this reference if SIR97 was used for solving of the structure
#Altomare, A., Burla, M. C., Camalli, M., Cascarano, G., Giacovazzo, C.,
#Guagliardi, A., Moliterni, A. G. G., Polidori, G., Spagna, R. (1997).
#SIR97. A Package for Crystal Structure Solution by Direct Methods
#and Refinement, Bari, Rome, Italy.

# use this reference if SIR2002 was used for solving of the structure
#Burla, M.C., Camalli, M., Carrozzini, B., Cascarano, G., Giacovazzo, C.,
#Polidori, G., Spagna, R.
#SIR2002: the program, J. Appl. Cryst, (2003). 36, 1103


# use this reference if SIR2011 was used for solving of the structure
#Burla, M.C., Caliandro, R., Camalli, M., Carrozzini, B., Cascarano,
#G.L., Giacovazzo, C., Mallamo. M., Mazzone, A., Polidori, G., Spagna, R.
#SIR2011: a new package for crystal structure determination and refinement,
#J.Appl.Cryst. (2012) 45, 357-361

# enable this reference if bond valences were calculated
#Brown, I. D. (1996). J. Appl. Cryst. 29, 479-480.

# enable this reference if Xshape wase used for crystal shape refinement
#Stoe & Cie (1998). X-SHAPE. Stoe & Cie, Darmstadt, Germany.


# enable this reference if Flack coefficient was refined
#Flack, H. D. (1983). Acta Cryst. A39, 876-881.
;
_publ_section_figure_captions
; ?
;
_publ_section_table_legends
; ?
;

#=======================================================================
data_I
#=======================================================================

# 5. CHEMICAL DATA

_chemical_name_systematic
; ?
;
_chemical_name_common                    ?
_chemical_formula_moiety                 ?
_chemical_formula_structural             ?
_chemical_formula_analytical             ?
_chemical_formula_iupac                  ?
_chemical_formula_sum                    'Al1 Mo6 Na9 O24'
_chemical_formula_weight                 1193.5
_chemical_melting_point                  ?
_chemical_compound_source                ?
_chemical_absolute_configuration         .

#=======================================================================

# 6. POWDER SPECIMEN AND CRYSTAL DATA

_symmetry_cell_setting                   monoclinic
_symmetry_space_group_name_H-M           'C 1 2/c 1'
_symmetry_space_group_name_Hall          '-C 2yc'
_symmetry_Int_Tables_number              15

loop_
 _space_group_symop_id
 _space_group_symop_operation_xyz
 1   x,y,z
 2   -x,y,-z+1/2
 3   -x,-y,-z
 4   x,-y,z+1/2
 5   x+1/2,y+1/2,z
 6   -x+1/2,y+1/2,-z+1/2
 7   -x+1/2,-y+1/2,-z
 8   x+1/2,-y+1/2,z+1/2

_cell_length_a                           15.4067(3)
_cell_length_b                           14.6428(3)
_cell_length_c                           10.6250(2)
_cell_angle_alpha                        90
_cell_angle_beta                         93.9910(17)
_cell_angle_gamma                        90
_cell_volume                             2391.16(9)


_cell_formula_units_Z                    4
_cell_measurement_temperature            293
_cell_special_details
; ?
;

_exptl_crystal_density_diffrn            3.3153
_exptl_crystal_density_meas              ?
_exptl_crystal_density_method            ?
_exptl_crystal_F_000                     2224

_pd_spec_size_axial                      ?
_pd_spec_size_equat                      ?
_pd_spec_size_thick                      ?
_pd_spec_mounting                        ?
_pd_spec_mount_mode                      ?
_pd_spec_shape                           ?
_pd_char_particle_morphology             ?
_pd_char_colour                          white
_pd_prep_cool_rate                       ?
_pd_prep_pressure                        ?
_pd_prep_temperature                     ?

_exptl_absorpt_coefficient_mu            27.999
_exptl_absorpt_correction_type           ?
_exptl_absorpt_process_details           ?
_exptl_absorpt_correction_T_min          ?
_exptl_absorpt_correction_T_max          ?
loop_
 _exptl_crystal_face_index_h
 _exptl_crystal_face_index_k
 _exptl_crystal_face_index_l
 _exptl_crystal_face_perp_dist
 ? ? ? ?

#=======================================================================

# 7. EXPERIMENTAL DATA

_exptl_special_details                   ?
_pd_instr_location
; ?
;
_pd_calibration_special_details
; ?
;

_diffrn_ambient_temperature              293
_diffrn_source                           ?
_diffrn_source_target                    Cu
_diffrn_source_type                      ?
_diffrn_radiation_type                   'CuK\a'
_diffrn_radiation_wavelength             1.5418
_diffrn_radiation_monochromator          ?
_diffrn_measurement_device               ?
_diffrn_measurement_device_type          'D8 ADVANCE Bruker'
_diffrn_detector                         ?
_diffrn_detector_type                    ?

_pd_meas_scan_method                     step
_pd_meas_special_details
; ?
;
_pd_meas_number_of_points                4479
_pd_meas_2theta_range_min                7.000
_pd_meas_2theta_range_max                99.963
_pd_meas_2theta_range_inc                0.021

_diffrn_radiation_probe                  X-ray

#=======================================================================

# 8. REFINEMENT DATA

_pd_proc_ls_special_details
; ?
;
_pd_proc_ls_profile_function             'Pseudo-Voigt'
_pd_proc_ls_background_function          '18 Legendre polynoms'
_pd_proc_ls_pref_orient_corr             none
_pd_proc_ls_prof_R_factor                0.0429
_pd_proc_ls_prof_wR_factor               0.0594
_pd_proc_ls_prof_wR_expected             0.0207

_refine_special_details
; ?
;

_refine_ls_R_factor_gt                   0.0348
_refine_ls_wR_factor_gt                  0.0420
_refine_ls_R_factor_all                  0.0349
_refine_ls_wR_factor_all                 0.0421
_refine_ls_goodness_of_fit_all           2.87
_refine_ls_restrained_S_gt               ?
_refine_ls_restrained_S_all              ?
_refine_ls_number_parameters             80
_refine_ls_number_restraints             12
_refine_ls_number_constraints            1
_refine_ls_weighting_scheme              sigma
_refine_ls_weighting_details             ?
_refine_ls_hydrogen_treatment            ?
_refine_ls_shift/su_max                  0.0480
_refine_ls_shift/su_mean                 0.0091
_refine_diff_density_max                 1.16
_refine_diff_density_min                 -0.92
_refine_ls_extinction_method             ?
_refine_ls_extinction_coef               ?

_pd_proc_2theta_range_min                7
_pd_proc_2theta_range_max                99.963
_pd_proc_2theta_range_inc                0.021
_pd_proc_wavelength                      ?

_pd_block_diffractogram_id               ?

_pd_proc_info_excluded_regions           ?
_pd_proc_info_data_reduction             ?

loop_
 _atom_type_symbol
 _atom_type_scat_dispersion_real
 _atom_type_scat_dispersion_imag
 _atom_type_scat_source
 Al   0.2166  0.2502
 'International Tables Vol C tables 4.2.6.8 and 6.1.1.1'
 Mo  -0.0355  2.7725
 'International Tables Vol C tables 4.2.6.8 and 6.1.1.1'
 Na   0.1377  0.1272
 'International Tables Vol C tables 4.2.6.8 and 6.1.1.1'
 O    0.0516  0.0335
 'International Tables Vol C tables 4.2.6.8 and 6.1.1.1'

_computing_data_collection               ?
_computing_cell_refinement               ?
_computing_data_reduction                ?
_computing_structure_solution            ?
_computing_structure_refinement          ?
_computing_molecular_graphics            ?
_computing_publication_material          ?

loop_
 _restr_distance_atom_site_label_1
 _restr_distance_site_symmetry_1
 _restr_distance_atom_site_label_2
 _restr_distance_site_symmetry_2
 _restr_distance_target
 _restr_distance_target_weight_param
Mo1 . O1 . 1.84 0.06
Mo1 . O2 . 1.8 0.06
Mo1 . O3 . 1.8 0.06
Mo1 . O4 1_556 1.8 0.06
Mo2 . O5 . 1.84 0.06
Mo2 . O6 . 1.84 0.06
Mo2 . O7 . 1.8 0.06
Mo2 . O8 . 1.8 0.06
Mo3 . O9 . 1.8 0.06
Mo3 . O10 1_554 1.8 0.06
Mo3 . O11 1_565 1.8 0.06
Mo3 . O12 . 1.8 0.06

loop_
 _restr_angle_atom_site_label_1
 _restr_angle_site_symmetry_1
 _restr_angle_atom_site_label_2
 _restr_angle_site_symmetry_2
 _restr_angle_atom_site_label_3
 _restr_angle_site_symmetry_3
 _restr_angle_target
 _restr_angle_target_weight_param
 ? ? ? ? ? ? ? ?

loop_
 _restr_torsion_atom_site_label_1
 _restr_torsion_site_symmetry_1
 _restr_torsion_atom_site_label_2
 _restr_torsion_site_symmetry_2
 _restr_torsion_atom_site_label_3
 _restr_torsion_site_symmetry_3
 _restr_torsion_atom_site_label_4
 _restr_torsion_site_symmetry_4
 _restr_torsion_angle_target
 _restr_torsion_weight_param
 ? ? ? ? ? ? ? ? ? ?

loop_
 _restr_equal_distance_atom_site_label_1
 _restr_equal_distance_site_symmetry_1
 _restr_equal_distance_atom_site_label_2
 _restr_equal_distance_site_symmetry_2
 _restr_equal_distance_class_class_id
 _restr_equal_distance_class_target_weight_param
 ? ? ? ? ? ?

loop_
 _restr_equal_angle_atom_site_label_1
 _restr_equal_angle_site_symmetry_1
 _restr_equal_angle_atom_site_label_2
 _restr_equal_angle_site_symmetry_2
 _restr_equal_angle_atom_site_label_3
 _restr_equal_angle_site_symmetry_3
 _restr_equal_angle_class_class_id
 _restr_equal_angle_class_target_weight_param
 ? ? ? ? ? ? ? ?

loop_
 _restr_equal_torsion_atom_site_label_1
 _restr_equal_torsion_site_symmetry_1
 _restr_equal_torsion_atom_site_label_2
 _restr_equal_torsion_site_symmetry_2
 _restr_equal_torsion_atom_site_label_3
 _restr_equal_torsion_site_symmetry_3
 _restr_equal_torsion_atom_site_label_4
 _restr_equal_torsion_site_symmetry_4
 _restr_equal_torsion_class_class_id
 _restr_equal_torsion_class_target_weight_param
 ? ? ? ? ? ? ? ? ? ?


#=======================================================================

# 9. ATOMIC COORDINATES AND DISPLACEMENT PARAMETERS

loop_
 _atom_site_label
 _atom_site_type_symbol
 _atom_site_fract_x
 _atom_site_fract_y
 _atom_site_fract_z
 _atom_site_adp_type
 _atom_site_U_iso_or_equiv
 _atom_site_site_symmetry_multiplicity
 _atom_site_occupancy
 _atom_site_calc_flag
 _atom_site_refinement_flags
 _atom_site_disorder_assembly
 _atom_site_disorder_group
  Al Al 0 0.255(4) 0.25 Uiso 0.001(4) 4 1 d . . .
  Na1 Na 0 0.035(3) 0.25 Uiso 0.018(2) 4 1 d . . .
  Na2 Na 0.6260(19) 0.858(2) 0.469(3) Uiso 0.018(2) 8 1 d . . .
  Na3 Na 0.306(2) 0.525(2) 0.469(3) Uiso 0.018(2) 8 1 d . . .
  Na4 Na 0.421(2) 0.858(2) 0.678(3) Uiso 0.018(2) 8 1 d . . .
  Na5 Na 0.688(3) 0.368(3) 0.221(3) Uiso 0.018(2) 8 1 d . . .
  Mo1 Mo 0.5135(6) 0.6487(6) 0.9592(8) Uiso 0.0028(4) 8 1 d . . .
  Mo2 Mo 0.7003(6) 0.6562(6) 0.3279(7) Uiso 0.0028(4) 8 1 d . . .
  Mo3 Mo 0.6007(6) 0.9393(6) 0.1334(9) Uiso 0.0028(4) 8 1 d . . .
  O1 O 0.489(2) 0.755(2) 0.890(4) Uiso 0.0008(20) 8 1 d . . .
  O2 O 0.621(2) 0.618(3) 0.907(3) Uiso 0.0008(20) 8 1 d . . .
  O3 O 0.435(3) 0.582(3) 0.887(4) Uiso 0.0008(20) 8 1 d . . .
  O4 O 0.540(3) 0.657(3) 0.135(3) Uiso 0.0008(20) 8 1 d . . .
  O5 O 0.659(2) 0.548(2) 0.268(3) Uiso 0.0008(20) 8 1 d . . .
  O6 O 0.8012(19) 0.7112(19) 0.287(3) Uiso 0.0008(20) 8 1 d . . .
  O7 O 0.728(2) 0.6672(17) 0.498(3) Uiso 0.0008(20) 8 1 d . . .
  O8 O 0.613(2) 0.736(2) 0.306(4) Uiso 0.0008(20) 8 1 d . . .
  O9 O 0.674(2) 0.938(2) 0.273(4) Uiso 0.0008(20) 8 1 d . . .
  O10 O 0.6833(18) 0.912(2) 1.010(3) Uiso 0.0008(20) 8 1 d . . .
  O11 O 0.547(3) 0.054(2) 0.143(4) Uiso 0.0008(20) 8 1 d . . .
  O12 O 0.523(3) 0.848(3) 0.126(5) Uiso 0.0008(20) 8 1 d . . .


#=======================================================================

# 10. MOLECULAR GEOMETRY


loop_
 _geom_bond_atom_site_label_1
 _geom_bond_atom_site_label_2
 _geom_bond_site_symmetry_1
 _geom_bond_site_symmetry_2
 _geom_bond_distance
 _geom_bond_publ_flag
  Al O4 . 5_445 2.02(6) ?
  Al O4 . 6_545 2.02(6) ?
  Al O8 . 5_445 1.83(4) ?
  Al O8 . 6_545 1.83(4) ?
  Al O12 . 5_445 1.93(6) ?
  Al O12 . 6_545 1.93(6) ?
  Na1 O3 . 7_556 2.51(5) ?
  Na1 O3 . 8_454 2.51(5) ?
  Na1 O4 . 5_445 2.27(6) ?
  Na1 O4 . 6_545 2.27(6) ?
  Na1 O5 . 5_445 2.45(4) ?
  Na1 O5 . 6_545 2.45(4) ?
  Na2 O1 . 2_656 2.83(5) ?
  Na2 O6 . 7_666 2.94(4) ?
  Na2 O7 . 7_666 2.28(4) ?
  Na2 O8 . . 2.50(5) ?
  Na2 O9 . . 2.55(3) ?
  Na2 O11 . 4_565 2.61(5) ?
  Na2 O12 . 2_655 2.45(5) ?
  Na3 Na5 . 2_655 3.07(5) ?
  Na3 O2 . 2_656 2.15(3) ?
  Na3 O3 . 4_564 2.72(5) ?
  Na3 O5 . 2_655 2.63(5) ?
  Na3 O5 . 3_666 3.01(5) ?
  Na3 O7 . 3_666 2.89(4) ?
  Na3 O9 . 5_445 3.09(3) ?
  Na3 O10 . 8_464 2.17(4) ?
  Na4 Na4 . 2_656 2.79(5) ?
  Na4 O1 . . 2.85(5) ?
  Na4 O1 . 2_656 2.21(5) ?
  Na4 O6 . 8_465 2.46(5) ?
  Na4 O10 . 2_656 2.60(4) ?
  Na4 O11 . 3_666 2.32(5) ?
  Na4 O11 . 4_565 2.38(5) ?
  Na5 O2 . 4_564 2.30(4) ?
  Na5 O3 . 3_666 2.26(6) ?
  Na5 O5 . . 2.73(5) ?
  Na5 O6 . 6_645 2.31(5) ?
  Na5 O7 . 4_564 2.54(5) ?
  Na5 O9 . 6_645 2.36(4) ?
  Mo1 O1 . . 1.75(4) ?
  Mo1 O2 . . 1.841(9) ?
  Mo1 O3 . . 1.70(4) ?
  Mo1 O4 . 1_556 1.88(4) ?
  Mo2 O4 . . 3.10(4) ?
  Mo2 O5 . . 1.80(3) ?
  Mo2 O6 . . 1.83(3) ?
  Mo2 O7 . . 1.84(3) ?
  Mo2 O8 . . 1.78(4) ?
  Mo3 O9 . . 1.800(9) ?
  Mo3 O10 . 1_554 1.93(3) ?
  Mo3 O11 . 1_565 1.88(4) ?
  Mo3 O12 . . 1.80(4) ?

loop_
 _geom_angle_atom_site_label_1
 _geom_angle_atom_site_label_2
 _geom_angle_atom_site_label_3
 _geom_angle_site_symmetry_1
 _geom_angle_site_symmetry_2
 _geom_angle_site_symmetry_3
 _geom_angle
 _geom_angle_publ_flag
 O1 Mo1 O2 . . . 105.2(2) ?
 O3 Mo1 O2 . . . 110.6(2) ?
 O1 Mo1 O3 . . . 101.3(2) ?
 O1 Mo1 O4 . . 1_556 112.6(2) ?
 O2 Mo1 O4 . . 1_556 100.2(2) ?
 O3 Mo1 O4 . . 1_556 125.7(2) ?
 O4 Mo2 O5 . . . 61.6(1) ?
 O4 Mo2 O6 . . . 119.5(1) ?
 O5 Mo2 O6 . . . 125.9(1) ?
 O4 Mo2 O7 . . . 140.5(1) ?
 O5 Mo2 O7 . . . 118.4(1) ?
 O6 Mo2 O7 . . . 92.9(1) ?
 O9 Mo3 O10 . . 1_554 98.7(2) ?
 O9 Mo3 O11 . . 1_565 102.6(2) ?
 O10 Mo3 O11 1_554 . 1_565 122.3(2) ?
 O9 Mo3 O12 . . . 114.0(2) ?
 O12 Mo3 O10 . . 1_554 106.6(2) ?
 O12 Mo3 O11 . . 1_565 112.0(2) ?
#=======================================================================

# 11. POWDER PROFILE

loop_
 _pd_proc_point_id
 _pd_proc_2theta_corrected
 _pd_proc_intensity_net
 _pd_calc_intensity_net
 _pd_proc_ls_weight
         1         6.9240        4120.00        4333.83          64.19
         2         6.9448        4128.00        4298.64          64.25
         3         6.9655        3998.00        4264.18          63.23
         4         6.9863        4068.00        4230.46          63.78
         5         7.0070        4083.00        4197.45          63.90
         6         7.0278        3991.00        4165.15          63.17
         7         7.0486        3970.00        4133.55          63.01
         8         7.0693        3993.00        4102.63          63.19
         9         7.0901        4118.00        4072.39          64.17
        10         7.1108        3946.00        4042.82          62.82
        11         7.1316        3950.00        4013.89          62.85
        12         7.1524        4015.00        3985.61          63.36
        13         7.1731        3998.00        3957.96          63.23
        14         7.1939        4005.00        3930.93          63.29
        15         7.2146        3878.00        3904.51          62.27
        16         7.2354        3877.00        3878.70          62.27
        17         7.2562        3893.00        3853.47          62.39
        18         7.2769        3912.00        3828.83          62.55
        19         7.2977        3863.00        3804.75          62.15
        20         7.3184        3863.00        3781.25          62.15
        21         7.3392        3708.00        3758.31          60.89
        22         7.3600        3842.00        3735.90          61.98
        23         7.3807        3844.00        3714.03          62.00
        24         7.4015        3721.00        3692.67          61.00
        25         7.4222        3607.00        3671.84          60.06
        26         7.4430        3604.00        3651.51          60.03
        27         7.4638        3607.00        3631.68          60.06
        28         7.4845        3643.00        3612.34          60.36
        29         7.5053        3643.00        3593.48          60.36
        30         7.5260        3668.00        3575.09          60.56
        31         7.5468        3658.00        3557.18          60.48
        32         7.5676        3508.00        3539.71          59.23
        33         7.5883        3501.00        3522.70          59.17
        34         7.6091        3504.00        3506.12          59.19
        35         7.6298        3536.00        3489.98          59.46
        36         7.6506        3617.00        3474.26          60.14
        37         7.6714        3524.00        3458.96          59.36
        38         7.6921        3532.00        3444.08          59.43
        39         7.7129        3472.00        3429.59          58.92
        40         7.7336        3527.00        3415.50          59.39
        41         7.7544        3586.00        3401.80          59.88
        42         7.7752        3514.00        3388.48          59.28
        43         7.7959        3537.00        3375.53          59.47
        44         7.8167        3575.00        3362.95          59.79
        45         7.8374        3486.00        3350.74          59.04
        46         7.8582        3376.00        3338.87          58.10
        47         7.8790        3335.00        3327.36          57.75
        48         7.8997        3471.00        3316.19          58.92
        49         7.9205        3419.00        3305.36          58.47
        50         7.9412        3331.00        3294.85          57.71
        51         7.9620        3412.00        3284.68          58.41
        52         7.9828        3320.00        3274.83          57.62
        53         8.0035        3369.00        3265.30          58.04
        54         8.0243        3260.00        3256.08          57.10
        55         8.0450        3269.00        3247.18          57.18
        56         8.0658        3425.00        3238.59          58.52
        57         8.0866        3313.00        3230.32          57.56
        58         8.1073        3247.00        3222.38          56.98
        59         8.1281        3405.00        3214.78          58.35
        60         8.1488        3290.00        3207.55          57.36
        61         8.1696        3242.00        3200.73          56.94
        62         8.1904        3239.00        3194.41          56.91
        63         8.2111        3361.00        3188.77          57.97
        64         8.2319        3278.00        3184.35          57.25
        65         8.2526        3278.00        3184.00          57.25
        66         8.2734        3316.00        3199.77          57.58
        67         8.2942        3231.00        3256.56          56.84
        68         8.3149        3161.00        3353.09          56.22
        69         8.3357        3193.00        3401.67          56.51
        70         8.3564        3262.00        3335.80          57.11
        71         8.3772        3175.00        3231.82          56.35
        72         8.3980        3122.00        3167.34          55.87
        73         8.4187        3087.00        3141.53          55.56
        74         8.4395        3186.00        3131.10          56.44
        75         8.4602        3172.00        3124.62          56.32
        76         8.4810        3104.00        3119.29          55.71
        77         8.5018        3120.00        3114.58          55.86
        78         8.5225        3176.00        3110.29          56.36
        79         8.5433        3080.00        3106.34          55.50
        80         8.5640        3152.00        3102.66          56.14
        81         8.5848        3081.00        3099.22          55.51
        82         8.6056        3099.00        3096.00          55.67
        83         8.6263        3078.00        3092.96          55.48
        84         8.6471        3138.00        3090.11          56.02
        85         8.6678        3063.00        3087.44          55.34
        86         8.6886        2957.00        3084.92          54.38
        87         8.7094        3132.00        3082.56          55.96
        88         8.7301        3138.00        3080.35          56.02
        89         8.7509        3069.00        3078.28          55.40
        90         8.7716        3032.00        3076.35          55.06
        91         8.7924        3036.00        3074.55          55.10
        92         8.8132        3024.00        3072.88          54.99
        93         8.8339        3130.00        3071.34          55.95
        94         8.8547        3056.00        3069.92          55.28
        95         8.8754        3041.00        3068.61          55.15
        96         8.8962        3111.00        3067.42          55.78
        97         8.9170        3118.00        3066.33          55.84
        98         8.9377        3018.00        3065.36          54.94
        99         8.9585        3187.00        3064.48          56.45
       100         8.9792        3004.00        3063.71          54.81
       101         9.0000        3120.00        3063.03          55.86
       102         9.0208        3075.00        3062.44          55.45
       103         9.0415        3095.00        3061.95          55.63
       104         9.0623        3006.00        3061.54          54.83
       105         9.0830        3019.00        3061.22          54.95
       106         9.1038        2997.00        3060.98          54.74
       107         9.1246        2976.00        3060.82          54.55
       108         9.1453        3064.00        3060.73          55.35
       109         9.1661        3015.00        3060.72          54.91
       110         9.1868        3077.00        3060.78          55.47
       111         9.2076        3056.00        3060.90          55.28
       112         9.2284        3079.00        3061.10          55.49
       113         9.2491        2989.00        3061.35          54.67
       114         9.2699        3041.00        3061.67          55.15
       115         9.2906        3027.00        3062.04          55.02
       116         9.3114        3033.00        3062.47          55.07
       117         9.3322        3130.00        3062.89          55.95
       118         9.3529        3056.00        3063.39          55.28
       119         9.3737        3154.00        3063.98          56.16
       120         9.3944        3074.00        3064.61          55.44
       121         9.4152        3020.00        3065.29          54.95
       122         9.4360        3029.00        3066.02          55.04
       123         9.4567        3053.00        3066.78          55.25
       124         9.4775        3031.00        3067.58          55.05
       125         9.4982        2982.00        3068.42          54.61
       126         9.5190        3107.00        3069.30          55.74
       127         9.5398        3122.00        3070.20          55.87
       128         9.5605        3077.00        3071.14          55.47
       129         9.5813        3011.00        3072.11          54.87
       130         9.6020        2947.00        3073.10          54.29
       131         9.6228        3064.00        3074.12          55.35
       132         9.6436        3068.00        3075.17          55.39
       133         9.6643        3102.00        3076.23          55.70
       134         9.6851        3092.00        3077.32          55.61
       135         9.7058        3036.00        3078.43          55.10
       136         9.7266        2960.00        3079.55          54.41
       137         9.7474        2999.00        3080.69          54.76
       138         9.7681        2983.00        3081.84          54.62
       139         9.7889        3020.00        3083.01          54.95
       140         9.8096        3052.00        3084.18          55.24
       141         9.8304        2989.00        3085.37          54.67
       142         9.8512        3067.00        3086.56          55.38
       143         9.8719        2941.00        3087.76          54.23
       144         9.8927        3020.00        3088.97          54.95
       145         9.9134        2918.00        3090.18          54.02
       146         9.9342        2958.00        3091.40          54.39
       147         9.9550        2915.00        3092.62          53.99
       148         9.9757        2928.00        3093.83          54.11
       149         9.9965        2949.00        3095.05          54.30
       150        10.0172        2941.00        3096.26          54.23
       151        10.0380        2894.00        3097.48          53.80
       152        10.0588        2956.00        3098.68          54.37
       153        10.0795        2981.00        3099.88          54.60
       154        10.1003        2902.00        3101.08          53.87
       155        10.1210        2852.00        3102.27          53.40
       156        10.1418        2878.00        3103.45          53.65
       157        10.1626        2997.00        3104.62          54.74
       158        10.1833        2861.00        3105.78          53.49
       159        10.2041        2993.00        3106.92          54.71
       160        10.2248        2986.00        3108.06          54.64
       161        10.2456        2916.00        3109.18          54.00
       162        10.2664        2856.00        3110.29          53.44
       163        10.2871        2903.00        3111.38          53.88
       164        10.3079        2942.00        3112.46          54.24
       165        10.3286        2999.00        3113.52          54.76
       166        10.3494        3019.00        3114.56          54.95
       167        10.3702        2912.00        3115.59          53.96
       168        10.3909        3072.00        3116.59          55.43
       169        10.4117        2980.00        3117.58          54.59
       170        10.4324        3032.00        3118.54          55.06
       171        10.4532        3037.00        3122.44          55.11
       172        10.4740        2980.00        3123.49          54.59
       173        10.4947        3033.00        3126.03          55.07
       174        10.5155        3078.00        3132.15          55.48
       175        10.5362        2979.00        3133.45          54.58
       176        10.5570        2974.00        3137.33          54.53
       177        10.5778        3041.00        3138.77          55.15
       178        10.5985        3005.00        3140.23          54.82
       179        10.6193        2979.00        3141.71          54.58
       180        10.6400        3092.00        3143.22          55.61
       181        10.6608        3068.00        3144.75          55.39
       182        10.6816        3155.00        3146.33          56.17
       183        10.7023        3110.00        3147.94          55.77
       184        10.7231        3176.00        3149.61          56.36
       185        10.7438        3046.00        3151.33          55.19
       186        10.7646        3082.00        3153.13          55.52
       187        10.7854        3136.00        3155.00          56.00
       188        10.8061        3053.00        3156.96          55.25
       189        10.8269        3076.00        3159.02          55.46
       190        10.8476        3163.00        3161.21          56.24
       191        10.8684        3042.00        3163.55          55.15
       192        10.8892        3035.00        3166.04          55.09
       193        10.9099        3089.00        3168.73          55.58
       194        10.9307        3174.00        3171.65          56.34
       195        10.9514        3104.00        3174.83          55.71
       196        10.9722        3117.00        3178.32          55.83
       197        10.9930        3088.00        3182.18          55.57
       198        11.0137        3063.00        3186.47          55.34
       199        11.0345        3063.00        3191.29          55.34
       200        11.0552        3089.00        3196.72          55.58
       201        11.0760        3190.00        3202.89          56.48
       202        11.0968        3135.00        3209.97          55.99
       203        11.1175        3182.00        3218.15          56.41
       204        11.1383        3273.00        3227.69          57.21
       205        11.1590        3243.00        3238.94          56.95
       206        11.1798        3338.00        3252.33          57.78
       207        11.2006        3191.00        3268.46          56.49
       208        11.2213        3385.00        3288.14          58.18
       209        11.2421        3408.00        3312.50          58.38
       210        11.2628        3433.00        3343.14          58.59
       211        11.2836        3524.00        3382.44          59.36
       212        11.3044        3563.00        3433.95          59.69
       213        11.3251        3858.00        3503.24          62.11
       214        11.3459        4168.00        3599.43          64.56
       215        11.3666        4591.00        3738.29          67.76
       216        11.3874        5272.00        3951.03          72.61
       217        11.4082        6621.00        4332.91          81.37
       218        11.4289        9225.00        5340.08          96.05
       219        11.4497       13481.00        8746.12         116.11
       220        11.4704       20462.00       17865.70         143.04
       221        11.4912       30809.00       32107.80         175.52
       222        11.5120       37204.00       39447.10         192.88
       223        11.5327       30565.00       32466.50         174.83
       224        11.5535       18872.00       19403.30         137.38
       225        11.5742        9799.00        9870.86          98.99
       226        11.5950        5725.00        5763.29          75.66
       227        11.6158        4455.00        4452.94          66.75
       228        11.6365        3831.00        3997.52          61.90
       229        11.6573        3651.00        3763.89          60.42
       230        11.6780        3653.00        3614.22          60.44
       231        11.6988        3601.00        3510.78          60.01
       232        11.7196        3439.00        3436.17          58.64
       233        11.7403        3403.00        3380.49          58.34
       234        11.7611        3255.00        3337.75          57.05
       235        11.7818        3360.00        3304.16          57.97
       236        11.8026        3369.00        3277.19          58.04
       237        11.8234        3364.00        3255.15          58.00
       238        11.8441        3268.00        3236.85          57.17
       239        11.8649        3312.00        3221.44          57.55
       240        11.8856        3400.00        3208.31          58.31
       241        11.9064        3304.00        3196.99          57.48
       242        11.9272        3216.00        3187.17          56.71
       243        11.9479        3174.00        3178.62          56.34
       244        11.9687        3228.00        3171.22          56.82
       245        11.9894        3239.00        3165.24          56.91
       246        12.0102        3244.00        3162.45          56.96
       247        12.0310        3289.00        3167.59          57.35
       248        12.0517        3327.00        3184.07          57.68
       249        12.0725        3263.00        3200.15          57.12
       250        12.0932        3244.00        3193.91          56.96
       251        12.1140        3245.00        3170.16          56.96
       252        12.1348        3296.00        3145.08          57.41
       253        12.1555        3169.00        3129.17          56.29
       254        12.1763        3243.00        3120.72          56.95
       255        12.1970        3122.00        3115.45          55.87
       256        12.2178        3212.00        3111.16          56.67
       257        12.2386        3091.00        3107.24          55.60
       258        12.2593        3088.00        3103.54          55.57
       259        12.2801        3174.00        3099.98          56.34
       260        12.3008        3110.00        3096.54          55.77
       261        12.3216        3195.00        3093.19          56.52
       262        12.3424        3166.00        3089.91          56.27
       263        12.3631        3112.00        3086.69          55.79
       264        12.3839        3148.00        3083.51          56.11
       265        12.4046        3075.00        3080.37          55.45
       266        12.4254        3154.00        3077.26          56.16
       267        12.4462        3088.00        3074.17          55.57
       268        12.4669        3094.00        3071.10          55.62
       269        12.4877        3132.00        3068.05          55.96
       270        12.5084        3154.00        3059.32          56.16
       271        12.5292        3286.00        3056.51          57.32
       272        12.5500        3212.00        3050.94          56.67
       273        12.5707        3054.00        3044.88          55.26
       274        12.5915        3213.00        3040.58          56.68
       275        12.6122        3040.00        3037.99          55.14
       276        12.6330        3115.00        3035.38          55.81
       277        12.6538        3141.00        3032.73          56.04
       278        12.6745        3042.00        3030.05          55.15
       279        12.6953        3014.00        3027.35          54.90
       280        12.7160        3093.00        3024.61          55.61
       281        12.7368        3092.00        3021.85          55.61
       282        12.7576        3192.00        3019.06          56.50
       283        12.7783        3033.00        3016.24          55.07
       284        12.7991        3065.00        3013.39          55.36
       285        12.8198        3129.00        3010.51          55.94
       286        12.8406        3093.00        3007.61          55.61
       287        12.8614        3092.00        3004.68          55.61
       288        12.8821        3147.00        3001.72          56.10
       289        12.9029        3085.00        2998.73          55.54
       290        12.9236        3055.00        2995.72          55.27
       291        12.9444        3156.00        2992.68          56.18
       292        12.9652        3055.00        2989.61          55.27
       293        12.9859        3177.00        2986.52          56.36
       294        13.0067        2977.00        2983.40          54.56
       295        13.0274        3060.00        2980.26          55.32
       296        13.0482        3034.00        2977.09          55.08
       297        13.0690        3190.00        2973.90          56.48
       298        13.0897        2980.00        2970.68          54.59
       299        13.1105        3091.00        2967.44          55.60
       300        13.1312        2982.00        2964.15          54.61
       301        13.1520        3042.00        2960.86          55.15
       302        13.1728        3021.00        2957.54          54.96
       303        13.1935        3074.00        2954.21          55.44
       304        13.2143        3148.00        2950.84          56.11
       305        13.2350        3074.00        2947.46          55.44
       306        13.2558        3065.00        2944.05          55.36
       307        13.2766        3015.00        2940.63          54.91
       308        13.2973        3040.00        2937.18          55.14
       309        13.3181        2935.00        2933.70          54.18
       310        13.3388        2986.00        2930.21          54.64
       311        13.3596        2963.00        2926.69          54.43
       312        13.3804        3003.00        2923.16          54.80
       313        13.4011        3011.00        2919.60          54.87
       314        13.4219        2933.00        2916.02          54.16
       315        13.4426        2989.00        2912.43          54.67
       316        13.4634        3000.00        2908.81          54.77
       317        13.4842        2991.00        2905.17          54.69
       318        13.5049        2987.00        2901.51          54.65
       319        13.5257        2866.00        2897.84          53.53
       320        13.5464        2921.00        2894.14          54.05
       321        13.5672        3028.00        2890.43          55.03
       322        13.5880        2947.00        2886.70          54.29
       323        13.6087        2861.00        2882.95          53.49
       324        13.6295        2925.00        2879.18          54.08
       325        13.6502        2867.00        2875.40          53.54
       326        13.6710        2893.00        2871.60          53.79
       327        13.6918        2998.00        2867.78          54.75
       328        13.7125        2879.00        2863.95          53.66
       329        13.7333        2929.00        2860.10          54.12
       330        13.7540        2971.00        2856.23          54.51
       331        13.7748        2855.00        2852.35          53.43
       332        13.7956        2847.00        2848.45          53.36
       333        13.8163        2930.00        2844.53          54.13
       334        13.8371        2898.00        2840.60          53.83
       335        13.8578        2852.00        2836.66          53.40
       336        13.8786        2881.00        2832.70          53.67
       337        13.8994        3018.00        2828.73          54.94
       338        13.9201        2953.00        2824.74          54.34
       339        13.9409        2956.00        2820.74          54.37
       340        13.9616        2955.00        2816.73          54.36
       341        13.9824        2876.00        2812.70          53.63
       342        14.0032        2969.00        2808.66          54.49
       343        14.0239        2921.00        2804.61          54.05
       344        14.0447        2854.00        2800.55          53.42
       345        14.0654        2805.00        2796.47          52.96
       346        14.0862        2768.00        2792.38          52.61
       347        14.1070        2786.00        2788.28          52.78
       348        14.1277        2667.00        2784.17          51.64
       349        14.1485        2795.00        2780.05          52.87
       350        14.1692        2724.00        2775.92          52.19
       351        14.1900        2733.00        2771.78          52.28
       352        14.2108        2875.00        2767.62          53.62
       353        14.2315        2745.00        2763.46          52.39
       354        14.2523        2684.00        2759.29          51.81
       355        14.2730        2700.00        2755.11          51.96
       356        14.2938        2720.00        2750.92          52.15
       357        14.3146        2743.00        2746.73          52.37
       358        14.3353        2759.00        2742.52          52.53
       359        14.3561        2753.00        2738.31          52.47
       360        14.3768        2684.00        2734.09          51.81
       361        14.3976        2686.00        2729.87          51.83
       362        14.4184        2723.00        2725.64          52.18
       363        14.4391        2644.00        2721.40          51.42
       364        14.4599        2680.00        2717.17          51.77
       365        14.4806        2696.00        2712.93          51.92
       366        14.5014        2568.00        2708.70          50.68
       367        14.5222        2657.00        2704.47          51.55
       368        14.5429        2607.00        2700.26          51.06
       369        14.5637        2648.00        2696.08          51.46
       370        14.5844        2624.00        2691.97          51.22
       371        14.6052        2664.00        2688.04          51.61
       372        14.6260        2537.00        2684.90          50.37
       373        14.6467        2609.00        2684.13          51.08
       374        14.6675        2575.00        2686.95          50.74
       375        14.6882        2579.00        2689.44          50.78
       376        14.7090        2632.00        2684.61          51.30
       377        14.7298        2591.00        2675.12          50.90
       378        14.7505        2575.00        2664.35          50.74
       379        14.7713        2558.00        2655.67          50.58
       380        14.7920        2504.00        2649.45          50.04
       381        14.8128        2551.00        2644.47          50.51
       382        14.8336        2601.00        2639.88          51.00
       383        14.8543        2519.00        2635.39          50.19
       384        14.8751        2540.00        2630.95          50.40
       385        14.8958        2542.00        2626.52          50.42
       386        14.9166        2634.00        2622.12          51.32
       387        14.9374        2426.00        2617.72          49.25
       388        14.9581        2555.00        2613.33          50.55
       389        14.9789        2488.00        2608.94          49.88
       390        14.9996        2551.00        2604.55          50.51
       391        15.0204        2556.00        2600.17          50.56
       392        15.0412        2440.00        2595.79          49.40
       393        15.0619        2526.00        2591.40          50.26
       394        15.0827        2488.00        2587.02          49.88
       395        15.1034        2506.00        2582.64          50.06
       396        15.1242        2448.00        2578.26          49.48
       397        15.1450        2519.00        2573.88          50.19
       398        15.1657        2415.00        2569.50          49.14
       399        15.1865        2408.00        2565.12          49.07
       400        15.2072        2528.00        2560.75          50.28
       401        15.2280        2451.00        2556.37          49.51
       402        15.2488        2424.00        2551.99          49.23
       403        15.2695        2444.00        2547.62          49.44
       404        15.2903        2452.00        2543.25          49.52
       405        15.3110        2475.00        2538.88          49.75
       406        15.3318        2411.00        2534.51          49.10
       407        15.3526        2442.00        2530.14          49.42
       408        15.3733        2449.00        2525.77          49.49
       409        15.3941        2420.00        2521.41          49.19
       410        15.4148        2404.00        2517.05          49.03
       411        15.4356        2399.00        2512.69          48.98
       412        15.4564        2496.00        2508.33          49.96
       413        15.4771        2428.00        2503.98          49.27
       414        15.4979        2365.00        2499.63          48.63
       415        15.5186        2454.00        2495.28          49.54
       416        15.5394        2370.00        2490.94          48.68
       417        15.5602        2417.00        2486.60          49.16
       418        15.5809        2434.00        2482.26          49.34
       419        15.6017        2395.00        2477.93          48.94
       420        15.6224        2277.00        2473.60          47.72
       421        15.6432        2406.00        2469.28          49.05
       422        15.6640        2295.00        2465.05          47.91
       423        15.6847        2320.00        2460.74          48.17
       424        15.7055        2258.00        2456.48          47.52
       425        15.7262        2327.00        2452.35          48.24
       426        15.7470        2311.00        2448.06          48.07
       427        15.7678        2321.00        2443.86          48.18
       428        15.7885        2355.00        2439.59          48.53
       429        15.8093        2343.00        2435.32          48.40
       430        15.8300        2365.00        2431.07          48.63
       431        15.8508        2335.00        2426.82          48.32
       432        15.8716        2305.00        2422.57          48.01
       433        15.8923        2326.00        2418.34          48.23
       434        15.9131        2287.00        2414.11          47.82
       435        15.9338        2300.00        2409.89          47.96
       436        15.9546        2264.00        2405.69          47.58
       437        15.9754        2276.00        2401.49          47.71
       438        15.9961        2395.00        2397.30          48.94
       439        16.0169        2266.00        2393.12          47.60
       440        16.0376        2321.00        2388.95          48.18
       441        16.0584        2250.00        2384.79          47.43
       442        16.0792        2156.00        2380.65          46.43
       443        16.0999        2269.00        2376.52          47.63
       444        16.1207        2274.00        2372.40          47.69
       445        16.1414        2278.00        2368.30          47.73
       446        16.1622        2209.00        2364.22          47.00
       447        16.1830        2288.00        2360.15          47.83
       448        16.2037        2227.00        2356.11          47.19
       449        16.2245        2236.00        2352.08          47.29
       450        16.2452        2225.00        2348.09          47.17
       451        16.2660        2151.00        2344.12          46.38
       452        16.2868        2239.00        2340.18          47.32
       453        16.3075        2262.00        2336.28          47.56
       454        16.3283        2168.00        2332.42          46.56
       455        16.3490        2311.00        2328.62          48.07
       456        16.3698        2232.00        2324.88          47.24
       457        16.3906        2166.00        2321.21          46.54
       458        16.4113        2233.00        2317.64          47.25
       459        16.4321        2220.00        2314.19          47.12
       460        16.4528        2204.00        2310.90          46.95
       461        16.4736        2222.00        2307.81          47.14
       462        16.4944        2249.00        2305.01          47.42
       463        16.5151        2183.00        2302.60          46.72
       464        16.5359        2254.00        2300.76          47.48
       465        16.5566        2256.00        2299.78          47.50
       466        16.5774        2132.00        2300.18          46.17
       467        16.5982        2356.00        2302.99          48.54
       468        16.6189        2330.00        2311.53          48.27
       469        16.6397        2317.00        2341.16          48.14
       470        16.6604        2416.00        2444.91          49.15
       471        16.6812        2681.00        2698.40          51.78
       472        16.7020        2923.00        3028.98          54.06
       473        16.7227        2980.00        3105.29          54.59
       474        16.7435        2959.00        2941.22          54.40
       475        16.7642        2760.00        2704.52          52.54
       476        16.7850        2580.00        2469.25          50.79
       477        16.8058        2420.00        2333.39          49.19
       478        16.8265        2200.00        2278.98          46.90
       479        16.8473        2240.00        2257.94          47.33
       480        16.8680        2370.00        2246.26          48.68
       481        16.8888        2320.00        2237.65          48.17
       482        16.9096        2170.00        2230.59          46.58
       483        16.9303        2240.00        2224.46          47.33
       484        16.9511        2260.00        2218.96          47.54
       485        16.9718        2130.00        2213.88          46.15
       486        16.9926        2300.00        2209.09          47.96
       487        17.0134        2133.00        2204.53          46.18
       488        17.0341        2149.00        2200.13          46.36
       489        17.0549        2223.00        2195.85          47.15
       490        17.0756        2122.00        2191.68          46.07
       491        17.0964        2188.00        2187.59          46.78
       492        17.1172        2132.00        2183.57          46.17
       493        17.1379        2271.00        2179.61          47.65
       494        17.1587        2117.00        2175.69          46.01
       495        17.1794        2225.00        2171.82          47.17
       496        17.2002        2223.00        2167.98          47.15
       497        17.2210        2118.00        2164.48          46.02
       498        17.2417        2225.00        2160.72          47.17
       499        17.2625        2110.00        2157.13          45.93
       500        17.2832        2085.00        2153.43          45.66
       501        17.3040        2063.00        2150.46          45.42
       502        17.3248        2129.00        2146.84          46.14
       503        17.3455        2129.00        2143.58          46.14
       504        17.3663        2134.00        2140.02          46.20
       505        17.3870        2073.00        2137.69          45.53
       506        17.4078        2017.00        2134.22          44.91
       507        17.4286        2048.00        2131.38          45.25
       508        17.4493        2118.00        2128.00          46.02
       509        17.4701        2083.00        2124.64          45.64
       510        17.4908        2119.00        2121.32          46.03
       511        17.5116        2086.00        2118.03          45.67
       512        17.5324        2066.00        2114.77          45.45
       513        17.5531        2050.00        2111.55          45.28
       514        17.5739        2127.00        2108.36          46.12
       515        17.5946        2101.00        2105.21          45.84
       516        17.6154        2084.00        2102.10          45.65
       517        17.6362        2085.00        2099.04          45.66
       518        17.6569        2024.00        2096.03          44.99
       519        17.6777        2127.00        2093.07          46.12
       520        17.6984        2126.00        2090.16          46.11
       521        17.7192        2103.00        2087.16          45.86
       522        17.7400        2137.00        2084.39          46.23
       523        17.7607        2059.00        2081.53          45.38
       524        17.7815        2052.00        2078.93          45.30
       525        17.8022        2074.00        2076.43          45.54
       526        17.8230        2026.00        2074.00          45.01
       527        17.8438        2008.00        2071.74          44.81
       528        17.8645        2025.00        2069.63          45.00
       529        17.8853        2015.00        2067.70          44.89
       530        17.9060        2058.00        2065.96          45.37
       531        17.9268        2079.00        2064.47          45.60
       532        17.9476        1978.00        2063.26          44.47
       533        17.9683        2087.00        2069.54          45.68
       534        17.9891        2076.00        2069.39          45.56
       535        18.0098        2036.00        2073.30          45.12
       536        18.0306        2002.00        2074.54          44.74
       537        18.0514        2042.00        2076.69          45.19
       538        18.0721        2109.00        2080.02          45.92
       539        18.0929        1963.00        2084.90          44.31
       540        18.1136        2068.00        2091.90          45.48
       541        18.1344        2109.00        2110.15          45.92
       542        18.1552        2062.00        2124.80          45.41
       543        18.1759        2137.00        2168.49          46.23
       544        18.1967        2203.00        2200.92          46.94
       545        18.2174        2249.00        2251.06          47.42
       546        18.2382        2528.00        2340.15          50.28
       547        18.2590        2944.00        2559.60          54.26
       548        18.2797        3684.00        3251.87          60.70
       549        18.3005        5111.00        5048.63          71.49
       550        18.3212        7584.00        7744.70          87.09
       551        18.3420        8813.00        8796.06          93.88
       552        18.3628        7255.00        7653.10          85.18
       553        18.3835        6016.00        6210.33          77.56
       554        18.4043        4423.00        4400.23          66.51
       555        18.4250        3262.00        3088.16          57.11
       556        18.4458        2557.00        2514.93          50.57
       557        18.4666        2467.00        2324.90          49.67
       558        18.4873        2431.00        2251.63          49.31
       559        18.5081        2400.00        2221.75          48.99
       560        18.5288        2420.00        2199.30          49.19
       561        18.5496        2412.00        2186.70          49.11
       562        18.5704        2372.00        2185.46          48.70
       563        18.5911        2345.00        2185.21          48.43
       564        18.6119        2380.00        2189.39          48.79
       565        18.6326        2313.00        2197.64          48.09
       566        18.6534        2318.00        2209.91          48.15
       567        18.6742        2398.00        2226.42          48.97
       568        18.6949        2316.00        2251.66          48.12
       569        18.7157        2434.00        2278.54          49.34
       570        18.7364        2372.00        2313.97          48.70
       571        18.7572        2522.00        2355.65          50.22
       572        18.7780        2509.00        2407.63          50.09
       573        18.7987        2468.00        2472.93          49.68
       574        18.8195        2577.00        2555.93          50.76
       575        18.8402        2649.00        2663.04          51.47
       576        18.8610        2852.00        2803.90          53.40
       577        18.8818        3041.00        2993.69          55.15
       578        18.9025        3408.00        3257.12          58.38
       579        18.9233        3859.00        3637.22          62.12
       580        18.9440        4670.00        4221.35          68.34
       581        18.9648        6479.00        5275.86          80.49
       582        18.9856        9906.00        7917.98          99.53
       583        19.0063       17377.00       15891.80         131.82
       584        19.0271       32893.00       35138.80         181.36
       585        19.0478       59316.00       61962.90         243.55
       586        19.0686       72181.00       70487.20         268.67
       587        19.0894       56761.00       58811.80         238.25
       588        19.1101       44604.00       45142.40         211.20
       589        19.1309       27451.00       27272.50         165.68
       590        19.1516       12779.00       13640.90         113.04
       591        19.1724        6814.00        7253.26          82.55
       592        19.1932        4787.00        4943.79          69.19
       593        19.2139        4081.00        4018.01          63.88
       594        19.2347        3621.00        3515.03          60.17
       595        19.2554        3373.00        3190.27          58.08
       596        19.2762        3194.00        2967.54          56.52
       597        19.2970        2974.00        2810.77          54.53
       598        19.3177        2819.00        2698.41          53.09
       599        19.3385        2757.00        2620.61          52.51
       600        19.3592        2634.00        2568.30          51.32
       601        19.3800        2688.00        2537.82          51.85
       602        19.4008        2736.00        2528.19          52.31
       603        19.4215        2772.00        2538.91          52.65
       604        19.4423        2790.00        2572.02          52.82
       605        19.4630        2730.00        2633.06          52.25
       606        19.4838        2867.00        2731.65          53.54
       607        19.5046        3052.00        2883.91          55.24
       608        19.5253        3345.00        3121.36          57.84
       609        19.5461        4022.00        3521.29          63.42
       610        19.5668        5291.00        4363.04          72.74
       611        19.5876        7766.00        6650.02          88.12
       612        19.6084       12888.00       12707.00         113.53
       613        19.6291       23917.00       24316.40         154.65
       614        19.6499       37956.00       36031.90         194.82
       615        19.6706       40258.00       35890.70         200.64
       616        19.6914       28923.00       29572.20         170.07
       617        19.7122       23213.00       22209.20         152.36
       618        19.7329       13631.00       13393.60         116.75
       619        19.7537        6538.00        7314.58          80.86
       620        19.7744        4004.00        4514.34          63.28
       621        19.7952        3263.00        3447.54          57.12
       622        19.8160        3049.00        2979.52          55.22
       623        19.8367        2697.00        2708.27          51.93
       624        19.8575        2620.00        2525.43          51.19
       625        19.8782        2591.00        2394.23          50.90
       626        19.8990        2488.00        2297.09          49.88
       627        19.9198        2255.00        2222.02          47.49
       628        19.9405        2240.00        2162.91          47.33
       629        19.9613        2270.00        2118.89          47.64
       630        19.9820        2233.00        2080.10          47.25
       631        20.0028        2240.00        2049.41          47.33
       632        20.0236        2148.00        2014.74          46.35
       633        20.0443        2120.00        1991.97          46.04
       634        20.0651        2021.00        1968.58          44.96
       635        20.0858        2138.00        1951.74          46.24
       636        20.1066        2029.00        1937.01          45.04
       637        20.1274        2040.00        1924.04          45.17
       638        20.1481        2092.00        1912.55          45.74
       639        20.1689        2071.00        1887.40          45.51
       640        20.1896        2029.00        1878.78          45.04
       641        20.2104        1978.00        1867.02          44.47
       642        20.2312        1894.00        1856.98          43.52
       643        20.2519        1923.00        1851.04          43.85
       644        20.2727        1994.00        1845.73          44.65
       645        20.2934        2043.00        1841.00          45.20
       646        20.3142        1951.00        1836.81          44.17
       647        20.3350        1927.00        1833.14          43.90
       648        20.3557        1972.00        1829.98          44.41
       649        20.3765        1904.00        1827.35          43.63
       650        20.3972        1856.00        1825.28          43.08
       651        20.4180        1969.00        1823.81          44.37
       652        20.4388        1874.00        1823.04          43.29
       653        20.4595        1918.00        1823.11          43.79
       654        20.4803        1875.00        1824.25          43.30
       655        20.5010        1929.00        1826.82          43.92
       656        20.5218        1879.00        1831.44          43.35
       657        20.5426        1925.00        1839.22          43.87
       658        20.5633        1993.00        1852.65          44.64
       659        20.5841        2093.00        1880.48          45.75
       660        20.6048        2153.00        1960.27          46.40
       661        20.6256        2314.00        2203.60          48.10
       662        20.6464        2698.00        2709.03          51.94
       663        20.6671        3080.00        3166.86          55.50
       664        20.6879        3045.00        3030.12          55.18
       665        20.7086        2675.00        2782.34          51.72
       666        20.7294        2493.00        2550.69          49.93
       667        20.7502        2300.00        2222.53          47.96
       668        20.7709        1986.00        2013.84          44.56
       669        20.7917        1922.00        1945.72          43.84
       670        20.8124        2009.00        1934.23          44.82
       671        20.8332        2017.00        1958.14          44.91
       672        20.8540        2072.00        1999.28          45.52
       673        20.8747        2136.00        2074.60          46.22
       674        20.8955        2404.00        2206.52          49.03
       675        20.9162        2708.00        2506.04          52.04
       676        20.9370        3523.00        3385.43          59.35
       677        20.9578        5394.00        5648.96          73.44
       678        20.9785        9068.00        9354.62          95.23
       679        20.9993       11884.00       11593.60         109.01
       680        21.0200       10301.00       10251.60         101.49
       681        21.0408        8192.00        8633.41          90.51
       682        21.0616        6861.00        6666.70          82.83
       683        21.0823        4251.00        4372.10          65.20
       684        21.1031        2822.00        2932.68          53.12
       685        21.1238        2275.00        2322.73          47.70
       686        21.1446        2058.00        2094.39          45.37
       687        21.1654        2034.00        1986.03          45.10
       688        21.1861        1937.00        1919.07          44.01
       689        21.2069        1946.00        1872.91          44.11
       690        21.2276        1805.00        1839.43          42.49
       691        21.2484        1856.00        1814.26          43.08
       692        21.2692        1837.00        1794.76          42.86
       693        21.2899        1855.00        1779.26          43.07
       694        21.3107        1781.00        1766.68          42.20
       695        21.3314        1796.00        1756.27          42.38
       696        21.3522        1741.00        1747.51          41.73
       697        21.3730        1862.00        1740.03          43.15
       698        21.3937        1779.00        1733.56          42.18
       699        21.4145        1667.00        1727.90          40.83
       700        21.4352        1714.00        1722.89          41.40
       701        21.4560        1724.00        1718.42          41.52
       702        21.4768        1743.00        1714.39          41.75
       703        21.4975        1724.00        1710.72          41.52
       704        21.5183        1689.00        1707.37          41.10
       705        21.5390        1646.00        1704.28          40.57
       706        21.5598        1757.00        1701.42          41.92
       707        21.5806        1769.00        1698.76          42.06
       708        21.6013        1724.00        1696.26          41.52
       709        21.6221        1724.00        1693.61          41.52
       710        21.6428        1671.00        1691.41          40.88
       711        21.6636        1747.00        1689.16          41.80
       712        21.6844        1694.00        1687.18          41.16
       713        21.7051        1722.00        1685.28          41.50
       714        21.7259        1557.00        1683.46          39.46
       715        21.7466        1697.00        1681.71          41.19
       716        21.7674        1644.00        1679.86          40.55
       717        21.7882        1727.00        1678.24          41.56
       718        21.8089        1629.00        1676.66          40.36
       719        21.8297        1641.00        1675.08          40.51
       720        21.8504        1625.00        1673.62          40.31
       721        21.8712        1645.00        1672.19          40.56
       722        21.8920        1777.00        1670.80          42.15
       723        21.9127        1642.00        1669.44          40.52
       724        21.9335        1697.00        1668.12          41.19
       725        21.9542        1720.00        1667.30          41.47
       726        21.9750        1580.00        1666.06          39.75
       727        21.9958        1619.00        1665.07          40.24
       728        22.0165        1637.00        1663.88          40.46
       729        22.0373        1658.00        1662.72          40.72
       730        22.0580        1693.00        1658.60          41.15
       731        22.0788        1574.00        1657.60          39.67
       732        22.0996        1620.00        1655.97          40.25
       733        22.1203        1615.00        1654.59          40.19
       734        22.1411        1639.00        1653.76          40.48
       735        22.1618        1589.00        1652.62          39.86
       736        22.1826        1606.00        1652.33          40.07
       737        22.2034        1635.00        1651.57          40.44
       738        22.2241        1607.00        1650.83          40.09
       739        22.2449        1649.00        1650.10          40.61
       740        22.2656        1579.00        1649.38          39.74
       741        22.2864        1649.00        1648.69          40.61
       742        22.3072        1605.00        1648.01          40.06
       743        22.3279        1550.00        1647.35          39.37
       744        22.3487        1610.00        1646.71          40.12
       745        22.3694        1557.00        1646.10          39.46
       746        22.3902        1666.00        1645.51          40.82
       747        22.4110        1584.00        1644.95          39.80
       748        22.4317        1613.00        1644.41          40.16
       749        22.4525        1637.00        1643.91          40.46
       750        22.4732        1652.00        1643.44          40.64
       751        22.4940        1636.00        1643.00          40.45
       752        22.5148        1607.00        1642.61          40.09
       753        22.5355        1559.00        1642.27          39.48
       754        22.5563        1591.00        1641.98          39.89
       755        22.5770        1647.00        1641.75          40.58
       756        22.5978        1631.00        1641.58          40.39
       757        22.6186        1543.00        1641.49          39.28
       758        22.6393        1712.00        1641.49          41.38
       759        22.6601        1620.00        1641.60          40.25
       760        22.6808        1514.00        1641.82          38.91
       761        22.7016        1634.00        1642.19          40.42
       762        22.7224        1575.00        1642.72          39.69
       763        22.7431        1533.00        1643.47          39.15
       764        22.7639        1685.00        1644.45          41.05
       765        22.7846        1566.00        1645.75          39.57
       766        22.8054        1669.00        1647.42          40.85
       767        22.8262        1586.00        1649.58          39.82
       768        22.8469        1560.00        1652.35          39.50
       769        22.8677        1552.00        1655.92          39.40
       770        22.8884        1592.00        1660.56          39.90
       771        22.9092        1637.00        1666.66          40.46
       772        22.9300        1585.00        1674.79          39.81
       773        22.9507        1639.00        1685.86          40.48
       774        22.9715        1718.00        1701.31          41.45
       775        22.9922        1635.00        1723.72          40.44
       776        23.0130        1746.00        1758.19          41.79
       777        23.0338        1852.00        1819.41          43.03
       778        23.0545        1950.00        1959.51          44.16
       779        23.0753        2366.00        2338.19          48.64
       780        23.0960        3143.00        3228.17          56.06
       781        23.1168        4463.00        4583.10          66.81
       782        23.1376        5708.00        5222.39          75.55
       783        23.1583        4951.00        4583.69          70.36
       784        23.1791        3949.00        4058.45          62.84
       785        23.1998        3760.00        3537.92          61.32
       786        23.2206        2788.00        2729.48          52.80
       787        23.2414        2040.00        2148.37          45.17
       788        23.2621        1783.00        1885.13          42.23
       789        23.2829        1690.00        1785.73          41.11
       790        23.3036        1630.00        1740.60          40.37
       791        23.3244        1655.00        1713.78          40.68
       792        23.3452        1677.00        1695.74          40.95
       793        23.3659        1680.00        1682.96          40.99
       794        23.3867        1525.00        1679.91          39.05
       795        23.4074        1569.00        1673.22          39.61
       796        23.4282        1573.00        1668.24          39.66
       797        23.4490        1573.00        1667.65          39.66
       798        23.4697        1594.00        1665.06          39.92
       799        23.4905        1633.00        1663.25          40.41
       800        23.5112        1684.00        1662.10          41.04
       801        23.5320        1663.00        1661.50          40.78
       802        23.5528        1584.00        1661.39          39.80
       803        23.5735        1679.00        1661.73          40.98
       804        23.5943        1713.00        1662.50          41.39
       805        23.6150        1750.00        1663.68          41.83
       806        23.6358        1693.00        1665.27          41.15
       807        23.6566        1660.00        1667.29          40.74
       808        23.6773        1693.00        1669.76          41.15
       809        23.6981        1587.00        1672.70          39.84
       810        23.7188        1628.00        1676.17          40.35
       811        23.7396        1674.00        1680.22          40.91
       812        23.7604        1642.00        1684.93          40.52
       813        23.7811        1605.00        1690.38          40.06
       814        23.8019        1617.00        1696.68          40.21
       815        23.8226        1642.00        1703.98          40.52
       816        23.8434        1702.00        1712.46          41.26
       817        23.8642        1651.00        1722.33          40.63
       818        23.8849        1681.00        1733.87          41.00
       819        23.9057        1705.00        1747.47          41.29
       820        23.9264        1802.00        1763.62          42.45
       821        23.9472        1631.00        1783.00          40.39
       822        23.9680        1746.00        1806.77          41.79
       823        23.9887        1803.00        1837.55          42.46
       824        24.0095        1842.00        1881.53          42.92
       825        24.0302        1834.00        1946.94          42.83
       826        24.0510        1867.00        2030.39          43.21
       827        24.0718        1991.00        2103.06          44.62
       828        24.0925        2012.00        2170.55          44.86
       829        24.1133        2080.00        2273.62          45.61
       830        24.1340        2238.00        2418.15          47.31
       831        24.1548        2497.00        2624.50          49.97
       832        24.1756        2913.00        2961.82          53.97
       833        24.1963        3624.00        3594.56          60.20
       834        24.2171        5056.00        5096.77          71.11
       835        24.2378        8760.00        9188.88          93.59
       836        24.2586       17388.00       18729.10         131.86
       837        24.2794       30284.00       32114.00         174.02
       838        24.3001       35434.00       34980.40         188.24
       839        24.3209       27749.00       27154.70         166.58
       840        24.3416       22971.00       23517.90         151.56
       841        24.3624       19501.00       19205.00         139.65
       842        24.3832       11965.00       11452.10         109.39
       843        24.4039        6088.00        6186.71          78.03
       844        24.4247        3716.00        3913.03          60.96
       845        24.4454        2916.00        3033.52          54.00
       846        24.4662        2480.00        2621.84          49.80
       847        24.4870        2355.00        2377.27          48.53
       848        24.5077        2151.00        2212.14          46.38
       849        24.5285        2113.00        2093.91          45.97
       850        24.5492        1843.00        2006.16          42.93
       851        24.5700        1847.00        1939.16          42.98
       852        24.5908        1870.00        1891.91          43.24
       853        24.6115        1813.00        1850.36          42.58
       854        24.6323        1743.00        1816.72          41.75
       855        24.6530        1739.00        1797.45          41.70
       856        24.6738        1680.00        1774.82          40.99
       857        24.6946        1670.00        1755.86          40.87
       858        24.7153        1623.00        1739.85          40.29
       859        24.7361        1568.00        1726.23          39.60
       860        24.7568        1606.00        1714.57          40.07
       861        24.7776        1660.00        1704.54          40.74
       862        24.7984        1652.00        1695.87          40.64
       863        24.8191        1632.00        1688.35          40.40
       864        24.8399        1638.00        1687.47          40.47
       865        24.8606        1651.00        1682.09          40.63
       866        24.8814        1665.00        1677.48          40.80
       867        24.9022        1671.00        1676.34          40.88
       868        24.9229        1685.00        1673.17          41.05
       869        24.9437        1643.00        1670.60          40.53
       870        24.9644        1650.00        1668.57          40.62
       871        24.9852        1585.00        1670.90          39.81
       872        25.0060        1697.00        1670.04          41.19
       873        25.0267        1653.00        1669.71          40.66
       874        25.0475        1626.00        1671.80          40.32
       875        25.0682        1672.00        1672.68          40.89
       876        25.0890        1616.00        1674.32          40.20
       877        25.1098        1656.00        1681.36          40.69
       878        25.1305        1604.00        1687.92          40.05
       879        25.1513        1579.00        1700.63          39.74
       880        25.1720        1620.00        1718.71          40.25
       881        25.1928        1670.00        1724.09          40.87
       882        25.2136        1644.00        1715.41          40.55
       883        25.2343        1667.00        1718.59          40.83
       884        25.2551        1705.00        1722.22          41.29
       885        25.2758        1748.00        1720.47          41.81
       886        25.2966        1718.00        1730.86          41.45
       887        25.3174        1746.00        1740.53          41.79
       888        25.3381        1858.00        1753.62          43.10
       889        25.3589        1771.00        1772.34          42.08
       890        25.3796        1793.00        1791.60          42.34
       891        25.4004        1878.00        1814.68          43.34
       892        25.4212        1907.00        1842.51          43.67
       893        25.4419        1844.00        1876.43          42.94
       894        25.4627        1987.00        1918.27          44.58
       895        25.4834        2040.00        1963.28          45.17
       896        25.5042        2052.00        2030.33          45.30
       897        25.5250        2123.00        2117.57          46.08
       898        25.5457        2204.00        2230.47          46.95
       899        25.5665        2318.00        2391.33          48.15
       900        25.5872        2597.00        2622.67          50.96
       901        25.6080        2939.00        2979.93          54.21
       902        25.6288        3515.00        3629.96          59.29
       903        25.6495        5163.00        5166.71          71.85
       904        25.6703        8604.00        9308.95          92.76
       905        25.6910       16899.00       18695.30         130.00
       906        25.7118       30069.00       31177.90         173.40
       907        25.7326       33630.00       32493.70         183.38
       908        25.7533       23436.00       24456.70         153.09
       909        25.7741       20089.00       21555.40         141.74
       910        25.7948       19264.00       18794.20         138.79
       911        25.8156       11755.00       11715.00         108.42
       912        25.8364        6096.00        6443.72          78.08
       913        25.8571        3966.00        4104.39          62.98
       914        25.8779        3196.00        3221.33          56.53
       915        25.8986        2813.00        2835.37          53.04
       916        25.9194        2720.00        2629.12          52.15
       917        25.9402        2562.00        2513.82          50.62
       918        25.9609        2454.00        2460.00          49.54
       919        25.9817        2520.00        2456.89          50.20
       920        26.0024        2485.00        2504.10          49.85
       921        26.0232        2582.00        2611.27          50.81
       922        26.0440        3094.00        2803.47          55.62
       923        26.0647        3503.00        3146.00          59.19
       924        26.0855        4348.00        3852.42          65.94
       925        26.1062        6134.00        5640.24          78.32
       926        26.1270       10951.00       10347.00         104.65
       927        26.1478       20539.00       20155.50         143.31
       928        26.1685       32390.00       30808.20         179.97
       929        26.1893       30510.00       28594.00         174.67
       930        26.2100       20664.00       21097.50         143.75
       931        26.2308       19085.00       19444.70         138.15
       932        26.2516       17065.00       16367.10         130.63
       933        26.2723        9399.00        9692.74          96.95
       934        26.2931        4728.00        5290.84          68.76
       935        26.3138        3164.00        3502.43          56.25
       936        26.3346        2652.00        2826.10          51.50
       937        26.3554        2402.00        2492.52          49.01
       938        26.3761        2278.00        2285.13          47.73
       939        26.3969        2129.00        2142.40          46.14
       940        26.4176        2096.00        2039.08          45.78
       941        26.4384        1930.00        1961.60          43.93
       942        26.4592        1819.00        1901.82          42.65
       943        26.4799        1823.00        1854.61          42.70
       944        26.5007        1797.00        1821.27          42.39
       945        26.5214        1801.00        1790.30          42.44
       946        26.5422        1761.00        1764.61          41.96
       947        26.5630        1732.00        1745.32          41.62
       948        26.5837        1720.00        1727.10          41.47
       949        26.6045        1701.00        1711.52          41.24
       950        26.6252        1668.00        1692.75          40.84
       951        26.6460        1577.00        1681.34          39.71
       952        26.6668        1584.00        1671.41          39.80
       953        26.6875        1725.00        1660.09          41.53
       954        26.7083        1620.00        1652.62          40.25
       955        26.7290        1738.00        1646.11          41.69
       956        26.7498        1600.00        1640.47          40.00
       957        26.7706        1620.00        1635.63          40.25
       958        26.7913        1480.00        1631.61          38.47
       959        26.8121        1641.00        1628.46          40.51
       960        26.8328        1670.00        1626.37          40.87
       961        26.8536        1585.00        1628.36          39.81
       962        26.8744        1659.00        1626.77          40.73
       963        26.8951        1508.00        1637.87          38.83
       964        26.9159        1638.00        1683.24          40.47
       965        26.9366        1673.00        1763.70          40.90
       966        26.9574        1656.00        1808.14          40.69
       967        26.9782        1655.00        1753.15          40.68
       968        26.9989        1587.00        1716.50          39.84
       969        27.0197        1650.00        1716.16          40.62
       970        27.0404        1641.00        1681.04          40.51
       971        27.0612        1624.00        1636.30          40.30
       972        27.0820        1575.00        1607.57          39.69
       973        27.1027        1640.00        1599.07          40.50
       974        27.1235        1591.00        1596.19          39.89
       975        27.1442        1677.00        1592.74          40.95
       976        27.1650        1649.00        1596.89          40.61
       977        27.1858        1625.00        1598.13          40.31
       978        27.2065        1571.00        1600.03          39.64
       979        27.2273        1680.00        1618.25          40.99
       980        27.2480        1602.00        1618.43          40.03
       981        27.2688        1670.00        1623.40          40.87
       982        27.2896        1648.00        1629.28          40.60
       983        27.3103        1692.00        1636.20          41.13
       984        27.3311        1635.00        1642.51          40.44
       985        27.3518        1608.00        1652.25          40.10
       986        27.3726        1635.00        1660.19          40.44
       987        27.3934        1667.00        1674.20          40.83
       988        27.4141        1772.00        1691.14          42.10
       989        27.4349        1659.00        1710.09          40.73
       990        27.4556        1749.00        1735.97          41.82
       991        27.4764        1824.00        1768.75          42.71
       992        27.4972        1900.00        1811.18          43.59
       993        27.5179        1946.00        1867.62          44.11
       994        27.5387        2105.00        1945.26          45.88
       995        27.5594        2398.00        2057.82          48.97
       996        27.5802        2763.00        2240.92          52.56
       997        27.6010        3588.00        2613.81          59.90
       998        27.6217        5052.00        3514.39          71.08
       999        27.6425        7104.00        5493.36          84.29
      1000        27.6632       10365.00        8658.43         101.81
      1001        27.6840       13379.00       11231.70         115.67
      1002        27.7048       12278.00       10520.60         110.81
      1003        27.7255        9282.00        8738.23          96.34
      1004        27.7463        8141.00        7982.26          90.23
      1005        27.7670        7523.00        6952.32          86.74
      1006        27.7878        5363.00        5116.27          73.23
      1007        27.8086        3466.00        3655.89          58.87
      1008        27.8293        2855.00        2905.80          53.43
      1009        27.8501        2642.00        2643.16          51.40
      1010        27.8708        2591.00        2623.29          50.90
      1011        27.8916        2701.00        2751.75          51.97
      1012        27.9124        3013.00        3063.50          54.89
      1013        27.9331        3707.00        3797.51          60.89
      1014        27.9539        5634.00        5782.16          75.06
      1015        27.9746       10164.00       10885.30         100.82
      1016        27.9954       19206.00       19972.80         138.59
      1017        28.0162       26449.00       25463.60         162.63
      1018        28.0369       19884.00       19845.90         141.01
      1019        28.0577       14453.00       15353.90         120.22
      1020        28.0784       15325.00       15429.10         123.79
      1021        28.0992       13018.00       12545.70         114.10
      1022        28.1200        7115.00        7449.81          84.35
      1023        28.1407        4051.00        4345.89          63.65
      1024        28.1615        2953.00        3054.31          54.34
      1025        28.1822        2474.00        2532.36          49.74
      1026        28.2030        2169.00        2266.73          46.57
      1027        28.2238        2036.00        2099.79          45.12
      1028        28.2445        1897.00        1984.18          43.55
      1029        28.2653        1872.00        1900.15          43.27
      1030        28.2860        1860.00        1836.91          43.13
      1031        28.3068        1789.00        1787.98          42.30
      1032        28.3276        1804.00        1749.23          42.47
      1033        28.3483        1671.00        1717.96          40.88
      1034        28.3691        1705.00        1692.30          41.29
      1035        28.3898        1647.00        1670.95          40.58
      1036        28.4106        1604.00        1653.00          40.05
      1037        28.4314        1578.00        1637.84          39.72
      1038        28.4521        1552.00        1625.21          39.40
      1039        28.4729        1600.00        1615.14          40.00
      1040        28.4936        1573.00        1606.95          39.66
      1041        28.5144        1575.00        1598.78          39.69
      1042        28.5352        1543.00        1589.51          39.28
      1043        28.5559        1560.00        1581.87          39.50
      1044        28.5767        1537.00        1575.46          39.20
      1045        28.5974        1609.00        1570.25          40.11
      1046        28.6182        1641.00        1564.07          40.51
      1047        28.6390        1540.00        1558.80          39.24
      1048        28.6597        1628.00        1591.31          40.35
      1049        28.6805        1728.00        1588.78          41.57
      1050        28.7012        1719.00        1586.70          41.46
      1051        28.7220        1748.00        1592.74          41.81
      1052        28.7428        1670.00        1591.75          40.87
      1053        28.7635        1633.00        1605.74          40.41
      1054        28.7843        1679.00        1606.16          40.98
      1055        28.8050        1674.00        1606.99          40.91
      1056        28.8258        1657.00        1608.23          40.71
      1057        28.8466        1648.00        1617.25          40.60
      1058        28.8673        1661.00        1619.69          40.76
      1059        28.8881        1678.00        1619.04          40.96
      1060        28.9088        1640.00        1618.31          40.50
      1061        28.9296        1696.00        1622.59          41.18
      1062        28.9504        1753.00        1627.45          41.87
      1063        28.9711        1632.00        1629.06          40.40
      1064        28.9919        1623.00        1635.39          40.29
      1065        29.0126        1751.00        1642.47          41.85
      1066        29.0334        1725.00        1650.39          41.53
      1067        29.0542        1737.00        1659.27          41.68
      1068        29.0749        1721.00        1669.21          41.48
      1069        29.0957        1775.00        1680.36          42.13
      1070        29.1164        1834.00        1687.95          42.83
      1071        29.1372        1827.00        1702.36          42.74
      1072        29.1580        1741.00        1718.49          41.73
      1073        29.1787        1812.00        1734.27          42.57
      1074        29.1995        1789.00        1752.84          42.30
      1075        29.2202        1850.00        1776.73          43.01
      1076        29.2410        1883.00        1804.05          43.39
      1077        29.2618        1849.00        1834.39          43.00
      1078        29.2825        1916.00        1870.95          43.77
      1079        29.3033        1917.00        1913.66          43.78
      1080        29.3240        2075.00        1963.94          45.55
      1081        29.3448        2157.00        2023.66          46.44
      1082        29.3656        2201.00        2095.36          46.91
      1083        29.3863        2279.00        2182.44          47.74
      1084        29.4071        2375.00        2289.55          48.73
      1085        29.4278        2430.00        2423.39          49.29
      1086        29.4486        2630.00        2593.62          51.28
      1087        29.4694        2868.00        2814.75          53.55
      1088        29.4901        3074.00        3109.39          55.44
      1089        29.5109        3414.00        3514.67          58.43
      1090        29.5316        4054.00        4098.88          63.67
      1091        29.5524        4836.00        5018.07          69.54
      1092        29.5732        6488.00        6692.26          80.55
      1093        29.5939        9572.00       10175.70          97.84
      1094        29.6147       17755.00       17769.70         133.25
      1095        29.6354       33273.00       33371.50         182.41
      1096        29.6562       57354.00       59471.90         239.49
      1097        29.6770       81200.00       79398.00         284.96
      1098        29.6977       70480.00       64598.30         265.48
      1099        29.7185       44575.00       46451.30         211.13
      1100        29.7392       41950.00       44820.50         204.82
      1101        29.7600       42963.00       41668.60         207.27
      1102        29.7808       27153.00       25931.20         164.78
      1103        29.8015       11685.00       13432.00         108.10
      1104        29.8223        6542.00        7645.23          80.88
      1105        29.8430        4939.00        5346.32          70.28
      1106        29.8638        4052.00        4252.75          63.66
      1107        29.8846        3387.00        3596.53          58.20
      1108        29.9053        3149.00        3154.16          56.12
      1109        29.9261        2827.00        2837.73          53.17
      1110        29.9468        2560.00        2602.76          50.60
      1111        29.9676        2398.00        2423.38          48.97
      1112        29.9884        2320.00        2283.17          48.17
      1113        30.0091        2104.00        2171.38          45.87
      1114        30.0299        2115.00        2080.79          45.99
      1115        30.0506        1975.00        2006.34          44.44
      1116        30.0714        1938.00        1944.47          44.02
      1117        30.0922        1957.00        1892.55          44.24
      1118        30.1129        1824.00        1848.68          42.71
      1119        30.1337        1884.00        1811.48          43.41
      1120        30.1544        1710.00        1779.98          41.35
      1121        30.1752        1797.00        1753.64          42.39
      1122        30.1960        1699.00        1732.64          41.22
      1123        30.2167        1717.00        1719.29          41.44
      1124        30.2375        1692.00        1721.26          41.13
      1125        30.2582        1728.00        1751.35          41.57
      1126        30.2790        1743.00        1814.06          41.75
      1127        30.2998        1840.00        1866.03          42.90
      1128        30.3205        1819.00        1831.88          42.65
      1129        30.3413        1742.00        1767.06          41.74
      1130        30.3620        1670.00        1738.45          40.87
      1131        30.3828        1695.00        1720.12          41.17
      1132        30.4036        1686.00        1670.87          41.06
      1133        30.4243        1628.00        1619.36          40.35
      1134        30.4451        1598.00        1585.49          39.97
      1135        30.4658        1597.00        1566.26          39.96
      1136        30.4866        1513.00        1554.35          38.90
      1137        30.5074        1546.00        1546.23          39.32
      1138        30.5281        1586.00        1538.94          39.82
      1139        30.5489        1503.00        1532.66          38.77
      1140        30.5696        1535.00        1527.15          39.18
      1141        30.5904        1531.00        1522.91          39.13
      1142        30.6112        1520.00        1518.63          38.99
      1143        30.6319        1512.00        1501.49          38.88
      1144        30.6527        1529.00        1498.76          39.10
      1145        30.6734        1506.00        1496.47          38.81
      1146        30.6942        1452.00        1487.84          38.11
      1147        30.7150        1544.00        1485.76          39.29
      1148        30.7357        1516.00        1470.66          38.94
      1149        30.7565        1473.00        1470.78          38.38
      1150        30.7772        1473.00        1471.61          38.38
      1151        30.7980        1505.00        1473.83          38.79
      1152        30.8188        1487.00        1470.03          38.56
      1153        30.8395        1478.00        1474.82          38.44
      1154        30.8603        1536.00        1481.87          39.19
      1155        30.8810        1510.00        1491.78          38.86
      1156        30.9018        1516.00        1506.24          38.94
      1157        30.9226        1502.00        1527.20          38.76
      1158        30.9433        1582.00        1551.80          39.77
      1159        30.9641        1531.00        1615.32          39.13
      1160        30.9848        1739.00        1759.56          41.70
      1161        31.0056        2033.00        2091.41          45.09
      1162        31.0264        2603.00        2727.36          51.02
      1163        31.0471        3537.00        3528.71          59.47
      1164        31.0679        3854.00        3630.77          62.08
      1165        31.0886        2891.00        3040.29          53.77
      1166        31.1094        2566.00        2740.67          50.66
      1167        31.1302        2765.00        2769.47          52.58
      1168        31.1509        2581.00        2535.33          50.80
      1169        31.1717        2080.00        2084.55          45.61
      1170        31.1924        1731.00        1775.35          41.61
      1171        31.2132        1660.00        1625.02          40.74
      1172        31.2340        1584.00        1561.75          39.80
      1173        31.2547        1610.00        1536.04          40.12
      1174        31.2755        1573.00        1527.68          39.66
      1175        31.2962        1591.00        1531.44          39.89
      1176        31.3170        1614.00        1548.75          40.17
      1177        31.3378        1632.00        1588.42          40.40
      1178        31.3585        1761.00        1681.75          41.96
      1179        31.3793        1920.00        1918.37          43.82
      1180        31.4000        2397.00        2493.24          48.96
      1181        31.4208        3326.00        3407.63          57.67
      1182        31.4416        3766.00        3913.18          61.37
      1183        31.4623        3411.00        3265.44          58.40
      1184        31.4831        2632.00        2717.65          51.30
      1185        31.5038        2725.00        2753.99          52.20
      1186        31.5246        2700.00        2745.32          51.96
      1187        31.5454        2342.00        2253.00          48.39
      1188        31.5661        1802.00        1834.00          42.45
      1189        31.5869        1684.00        1637.74          41.04
      1190        31.6076        1626.00        1564.31          40.32
      1191        31.6284        1582.00        1528.97          39.77
      1192        31.6492        1547.00        1508.79          39.33
      1193        31.6699        1554.00        1496.24          39.42
      1194        31.6907        1526.00        1488.38          39.06
      1195        31.7114        1503.00        1483.76          38.77
      1196        31.7322        1433.00        1481.51          37.85
      1197        31.7530        1507.00        1481.20          38.82
      1198        31.7737        1494.00        1482.53          38.65
      1199        31.7945        1469.00        1485.37          38.33
      1200        31.8152        1570.00        1489.71          39.62
      1201        31.8360        1494.00        1495.59          38.65
      1202        31.8568        1542.00        1503.16          39.27
      1203        31.8775        1517.00        1512.65          38.95
      1204        31.8983        1605.00        1524.20          40.06
      1205        31.9190        1517.00        1538.75          38.95
      1206        31.9398        1570.00        1556.84          39.62
      1207        31.9606        1585.00        1579.62          39.81
      1208        31.9813        1685.00        1609.08          41.05
      1209        32.0021        1702.00        1650.37          41.26
      1210        32.0228        1718.00        1717.44          41.45
      1211        32.0436        1824.00        1842.48          42.71
      1212        32.0644        1945.00        2069.87          44.10
      1213        32.0851        2179.00        2390.73          46.68
      1214        32.1059        2368.00        2569.65          48.66
      1215        32.1266        2445.00        2473.31          49.45
      1216        32.1474        2305.00        2464.78          48.01
      1217        32.1682        2490.00        2655.29          49.90
      1218        32.1889        2684.00        2903.79          51.81
      1219        32.2097        2890.00        3179.18          53.76
      1220        32.2304        3323.00        3831.82          57.65
      1221        32.2512        4857.00        5505.61          69.69
      1222        32.2720        9040.00        9662.38          95.08
      1223        32.2927       17690.00       18600.00         133.00
      1224        32.3135       29272.00       30158.30         171.09
      1225        32.3342       28372.00       28456.50         168.44
      1226        32.3550       18578.00       18704.20         136.30
      1227        32.3758       15682.00       15790.60         125.23
      1228        32.3965       18171.00       18172.70         134.80
      1229        32.4173       15868.00       15385.10         125.97
      1230        32.4380        9367.00        8997.29          96.78
      1231        32.4588        5610.00        5152.41          74.90
      1232        32.4796        4169.00        3466.92          64.57
      1233        32.5003        3070.00        2729.94          55.41
      1234        32.5211        2910.00        2352.10          53.94
      1235        32.5418        2380.00        2119.51          48.79
      1236        32.5626        2240.00        1959.97          47.33
      1237        32.5834        1960.00        1844.38          44.27
      1238        32.6041        1830.00        1757.69          42.78
      1239        32.6249        1710.00        1690.32          41.35
      1240        32.6456        1640.00        1637.49          40.50
      1241        32.6664        1600.00        1594.95          40.00
      1242        32.6872        1550.00        1560.54          39.37
      1243        32.7079        1550.00        1531.36          39.37
      1244        32.7287        1620.00        1507.02          40.25
      1245        32.7494        1460.00        1486.29          38.21
      1246        32.7702        1570.00        1468.68          39.62
      1247        32.7910        1480.00        1453.21          38.47
      1248        32.8117        1595.00        1439.68          39.94
      1249        32.8325        1521.00        1427.74          39.00
      1250        32.8532        1467.00        1417.14          38.30
      1251        32.8740        1451.00        1407.72          38.09
      1252        32.8948        1450.00        1399.20          38.08
      1253        32.9155        1527.00        1391.41          39.08
      1254        32.9363        1417.00        1384.41          37.64
      1255        32.9570        1454.00        1378.01          38.13
      1256        32.9778        1398.00        1372.17          37.39
      1257        32.9986        1440.00        1366.72          37.95
      1258        33.0193        1454.00        1361.72          38.13
      1259        33.0401        1400.00        1357.08          37.42
      1260        33.0608        1362.00        1352.75          36.91
      1261        33.0816        1366.00        1348.71          36.96
      1262        33.1024        1319.00        1344.92          36.32
      1263        33.1231        1323.00        1341.36          36.37
      1264        33.1439        1352.00        1331.18          36.77
      1265        33.1646        1325.00        1328.38          36.40
      1266        33.1854        1370.00        1325.74          37.01
      1267        33.2062        1312.00        1325.58          36.22
      1268        33.2269        1343.00        1319.82          36.65
      1269        33.2477        1352.00        1317.74          36.77
      1270        33.2684        1340.00        1315.78          36.61
      1271        33.2892        1357.00        1313.93          36.84
      1272        33.3100        1254.00        1313.09          35.41
      1273        33.3307        1311.00        1311.44          36.21
      1274        33.3515        1279.00        1309.93          35.76
      1275        33.3722        1300.00        1308.54          36.06
      1276        33.3930        1345.00        1311.28          36.67
      1277        33.4138        1350.00        1310.29          36.74
      1278        33.4345        1353.00        1309.47          36.78
      1279        33.4553        1344.00        1308.82          36.66
      1280        33.4760        1337.00        1310.39          36.56
      1281        33.4968        1355.00        1310.25          36.81
      1282        33.5176        1309.00        1306.13          36.18
      1283        33.5383        1283.00        1302.07          35.82
      1284        33.5591        1382.00        1303.36          37.18
      1285        33.5798        1293.00        1305.27          35.96
      1286        33.6006        1296.00        1305.92          36.00
      1287        33.6214        1321.00        1307.66          36.35
      1288        33.6421        1295.00        1313.69          35.99
      1289        33.6629        1398.00        1322.74          37.39
      1290        33.6836        1352.00        1337.32          36.77
      1291        33.7044        1344.00        1370.78          36.66
      1292        33.7252        1399.00        1437.19          37.40
      1293        33.7459        1565.00        1596.20          39.56
      1294        33.7667        1821.00        1885.82          42.67
      1295        33.7874        2072.00        2139.53          45.52
      1296        33.8082        2058.00        2012.68          45.37
      1297        33.8290        1723.00        1771.84          41.51
      1298        33.8497        1659.00        1716.86          40.73
      1299        33.8705        1762.00        1776.70          41.98
      1300        33.8912        1655.00        1702.01          40.68
      1301        33.9120        1519.00        1534.24          38.97
      1302        33.9328        1394.00        1424.68          37.34
      1303        33.9535        1435.00        1377.31          37.88
      1304        33.9743        1397.00        1359.81          37.38
      1305        33.9950        1334.00        1353.42          36.52
      1306        34.0158        1411.00        1352.01          37.56
      1307        34.0366        1450.00        1353.80          38.08
      1308        34.0573        1441.00        1359.60          37.96
      1309        34.0781        1404.00        1366.34          37.47
      1310        34.0988        1446.00        1375.47          38.03
      1311        34.1196        1511.00        1387.25          38.87
      1312        34.1404        1452.00        1402.84          38.11
      1313        34.1611        1477.00        1421.53          38.43
      1314        34.1819        1510.00        1445.00          38.86
      1315        34.2026        1592.00        1474.68          39.90
      1316        34.2234        1525.00        1512.66          39.05
      1317        34.2442        1624.00        1562.06          40.30
      1318        34.2649        1786.00        1627.63          42.26
      1319        34.2857        1830.00        1717.15          42.78
      1320        34.3064        2054.00        1843.13          45.32
      1321        34.3272        2034.00        2029.61          45.10
      1322        34.3479        2383.00        2331.39          48.82
      1323        34.3687        2873.00        2904.83          53.60
      1324        34.3895        4205.00        4185.77          64.85
      1325        34.4102        7174.00        7141.49          84.70
      1326        34.4310       13319.00       13260.00         115.41
      1327        34.4518       20872.00       20925.70         144.47
      1328        34.4725       19432.00       18330.70         139.40
      1329        34.4933       11070.00       11014.70         105.21
      1330        34.5140        8874.00        9290.35          94.20
      1331        34.5348       11197.00       11600.50         105.82
      1332        34.5556       11205.00       11159.50         105.85
      1333        34.5763        6659.00        6510.12          81.60
      1334        34.5971        3592.00        3709.60          59.93
      1335        34.6178        2521.00        2604.78          50.21
      1336        34.6386        2071.00        2142.02          45.51
      1337        34.6594        1821.00        1901.40          42.67
      1338        34.6801        1832.00        1753.32          42.80
      1339        34.7009        1708.00        1653.96          41.33
      1340        34.7216        1601.00        1584.52          40.01
      1341        34.7424        1522.00        1535.07          39.01
      1342        34.7632        1472.00        1500.19          38.37
      1343        34.7839        1490.00        1476.62          38.60
      1344        34.8047        1477.00        1462.76          38.43
      1345        34.8254        1484.00        1458.30          38.52
      1346        34.8462        1467.00        1464.39          38.30
      1347        34.8670        1546.00        1484.37          39.32
      1348        34.8877        1520.00        1527.14          38.99
      1349        34.9085        1568.00        1616.19          39.60
      1350        34.9292        1759.00        1810.77          41.94
      1351        34.9500        2235.00        2237.22          47.28
      1352        34.9708        3119.00        3112.72          55.85
      1353        34.9915        4380.00        4465.03          66.18
      1354        35.0123        5255.00        5083.47          72.49
      1355        35.0330        4109.00        3932.03          64.10
      1356        35.0538        3086.00        3059.83          55.55
      1357        35.0746        2902.00        3088.36          53.87
      1358        35.0953        3334.00        3375.99          57.74
      1359        35.1161        2856.00        2847.44          53.44
      1360        35.1368        2160.00        2109.41          46.48
      1361        35.1576        1602.00        1717.21          40.03
      1362        35.1784        1530.00        1569.53          39.12
      1363        35.1991        1467.00        1547.59          38.30
      1364        35.2199        1571.00        1654.00          39.64
      1365        35.2406        1861.00        1974.38          43.14
      1366        35.2614        2382.00        2460.52          48.81
      1367        35.2822        2369.00        2425.87          48.67
      1368        35.3029        1898.00        1972.65          43.57
      1369        35.3237        1640.00        1763.34          40.50
      1370        35.3444        1731.00        1854.57          41.61
      1371        35.3652        1830.00        1908.28          42.78
      1372        35.3860        1623.00        1661.10          40.29
      1373        35.4067        1402.00        1439.58          37.44
      1374        35.4275        1299.00        1330.54          36.04
      1375        35.4482        1313.00        1283.22          36.24
      1376        35.4690        1285.00        1257.89          35.85
      1377        35.4897        1252.00        1241.22          35.38
      1378        35.5105        1312.00        1229.81          36.22
      1379        35.5313        1219.00        1221.71          34.91
      1380        35.5520        1253.00        1211.12          35.40
      1381        35.5728        1257.00        1205.49          35.45
      1382        35.5936        1167.00        1200.61          34.16
      1383        35.6143        1201.00        1196.75          34.66
      1384        35.6351        1154.00        1191.76          33.97
      1385        35.6558        1205.00        1190.85          34.71
      1386        35.6766        1189.00        1188.85          34.48
      1387        35.6974        1185.00        1187.12          34.42
      1388        35.7181        1228.00        1183.48          35.04
      1389        35.7389        1168.00        1182.71          34.18
      1390        35.7596        1242.00        1182.31          35.24
      1391        35.7804        1179.00        1185.22          34.34
      1392        35.8012        1230.00        1185.16          35.07
      1393        35.8219        1172.00        1187.30          34.23
      1394        35.8427        1227.00        1190.89          35.03
      1395        35.8634        1236.00        1196.57          35.16
      1396        35.8842        1204.00        1205.81          34.70
      1397        35.9050        1201.00        1221.16          34.66
      1398        35.9257        1195.00        1249.18          34.57
      1399        35.9465        1288.00        1311.72          35.89
      1400        35.9672        1442.00        1484.24          37.97
      1401        35.9880        1715.00        1903.44          41.41
      1402        36.0088        1982.00        2344.46          44.52
      1403        36.0295        1879.00        2010.72          43.35
      1404        36.0503        1557.00        1621.47          39.46
      1405        36.0710        1533.00        1563.57          39.15
      1406        36.0918        1572.00        1746.66          39.65
      1407        36.1126        1579.00        1720.76          39.74
      1408        36.1333        1464.00        1453.39          38.26
      1409        36.1541        1317.00        1295.17          36.29
      1410        36.1748        1250.00        1230.88          35.36
      1411        36.1956        1176.00        1204.17          34.29
      1412        36.2164        1171.00        1194.02          34.22
      1413        36.2371        1165.00        1186.24          34.13
      1414        36.2579        1155.00        1181.45          33.99
      1415        36.2786        1189.00        1178.92          34.48
      1416        36.2994        1166.00        1177.97          34.15
      1417        36.3202        1122.00        1178.36          33.50
      1418        36.3409        1212.00        1180.03          34.81
      1419        36.3617        1210.00        1182.40          34.79
      1420        36.3824        1171.00        1186.73          34.22
      1421        36.4032        1226.00        1193.38          35.01
      1422        36.4240        1242.00        1202.72          35.24
      1423        36.4447        1239.00        1216.65          35.20
      1424        36.4655        1257.00        1235.61          35.45
      1425        36.4862        1275.00        1264.69          35.71
      1426        36.5070        1366.00        1314.19          36.96
      1427        36.5278        1374.00        1417.72          37.07
      1428        36.5485        1762.00        1660.67          41.98
      1429        36.5693        2456.00        2144.35          49.56
      1430        36.5900        3275.00        2741.74          57.23
      1431        36.6108        3175.00        2774.99          56.35
      1432        36.6316        2327.00        2346.69          48.24
      1433        36.6523        2014.00        2098.29          44.88
      1434        36.6731        2265.00        2160.55          47.59
      1435        36.6938        2378.00        2311.66          48.76
      1436        36.7146        2264.00        2243.77          47.58
      1437        36.7354        2116.00        2292.79          46.00
      1438        36.7561        2549.00        2747.64          50.49
      1439        36.7769        3386.00        3778.30          58.19
      1440        36.7976        4023.00        4485.91          63.43
      1441        36.8184        3288.00        3412.32          57.34
      1442        36.8392        2494.00        2641.15          49.94
      1443        36.8599        2438.00        2559.31          49.38
      1444        36.8807        2570.00        2919.60          50.70
      1445        36.9014        2464.00        2695.26          49.64
      1446        36.9222        1994.00        2028.25          44.65
      1447        36.9430        1651.00        1644.19          40.63
      1448        36.9637        1487.00        1459.97          38.56
      1449        36.9845        1428.00        1379.51          37.79
      1450        37.0052        1316.00        1351.92          36.28
      1451        37.0260        1320.00        1355.39          36.33
      1452        37.0468        1401.00        1389.24          37.43
      1453        37.0675        1407.00        1473.99          37.51
      1454        37.0883        1711.00        1669.67          41.36
      1455        37.1090        2066.00        2105.65          45.45
      1456        37.1298        2822.00        2991.07          53.12
      1457        37.1506        3972.00        4324.61          63.02
      1458        37.1713        4121.00        4492.86          64.19
      1459        37.1921        3063.00        3118.63          55.34
      1460        37.2128        2411.00        2477.81          49.10
      1461        37.2336        2384.00        2634.36          48.83
      1462        37.2544        2670.00        3053.43          51.67
      1463        37.2751        2535.00        2560.57          50.35
      1464        37.2959        1851.00        1837.81          43.02
      1465        37.3166        1429.00        1483.36          37.80
      1466        37.3374        1266.00        1332.93          35.58
      1467        37.3582        1269.00        1261.46          35.62
      1468        37.3789        1221.00        1221.09          34.94
      1469        37.3997        1149.00        1195.28          33.90
      1470        37.4204        1152.00        1177.89          33.94
      1471        37.4412        1129.00        1166.31          33.60
      1472        37.4620        1221.00        1159.73          34.94
      1473        37.4827        1085.00        1159.44          32.94
      1474        37.5035        1163.00        1169.07          34.10
      1475        37.5242        1208.00        1197.90          34.76
      1476        37.5450        1166.00        1248.84          34.15
      1477        37.5658        1144.00        1303.86          33.82
      1478        37.5865        1272.00        1308.65          35.67
      1479        37.6073        1253.00        1261.03          35.40
      1480        37.6280        1207.00        1223.26          34.74
      1481        37.6488        1147.00        1216.06          33.87
      1482        37.6696        1211.00        1220.57          34.80
      1483        37.6903        1195.00        1202.12          34.57
      1484        37.7111        1153.00        1169.79          33.96
      1485        37.7318        1125.00        1147.72          33.54
      1486        37.7526        1131.00        1141.15          33.63
      1487        37.7734        1107.00        1148.04          33.27
      1488        37.7941        1225.00        1162.13          35.00
      1489        37.8149        1156.00        1174.06          34.00
      1490        37.8356        1213.00        1217.24          34.83
      1491        37.8564        1326.00        1326.65          36.41
      1492        37.8772        1497.00        1519.29          38.69
      1493        37.8979        1674.00        1698.78          40.91
      1494        37.9187        1713.00        1642.19          41.39
      1495        37.9394        1569.00        1463.21          39.61
      1496        37.9602        1381.00        1371.27          37.16
      1497        37.9810        1379.00        1389.67          37.13
      1498        38.0017        1413.00        1413.39          37.59
      1499        38.0225        1337.00        1329.76          36.56
      1500        38.0432        1251.00        1219.72          35.37
      1501        38.0640        1161.00        1148.54          34.07
      1502        38.0848        1137.00        1112.47          33.72
      1503        38.1055        1020.00        1094.91          31.94
      1504        38.1263        1079.00        1083.91          32.85
      1505        38.1470        1028.00        1077.25          32.06
      1506        38.1678        1070.00        1073.81          32.71
      1507        38.1886        1098.00        1070.14          33.14
      1508        38.2093        1074.00        1066.68          32.77
      1509        38.2301        1087.00        1063.44          32.97
      1510        38.2508        1055.00        1061.49          32.48
      1511        38.2716        1177.00        1059.86          34.31
      1512        38.2924        1104.00        1058.49          33.23
      1513        38.3131        1055.00        1056.90          32.48
      1514        38.3339        1106.00        1055.94          33.26
      1515        38.3546        1037.00        1055.17          32.20
      1516        38.3754        1052.00        1054.59          32.43
      1517        38.3962        1042.00        1054.20          32.28
      1518        38.4169        1061.00        1054.03          32.57
      1519        38.4377        1032.00        1054.14          32.12
      1520        38.4584        1149.00        1054.58          33.90
      1521        38.4792        1135.00        1055.48          33.69
      1522        38.5000        1066.00        1056.55          32.65
      1523        38.5207        1079.00        1059.02          32.85
      1524        38.5415        1121.00        1062.95          33.48
      1525        38.5622        1040.00        1069.35          32.25
      1526        38.5830        1089.00        1080.73          33.00
      1527        38.6038        1117.00        1103.26          33.42
      1528        38.6245        1108.00        1152.98          33.29
      1529        38.6453        1281.00        1275.70          35.79
      1530        38.6660        1476.00        1579.20          38.42
      1531        38.6868        1537.00        1636.77          39.20
      1532        38.7076        1336.00        1444.05          36.55
      1533        38.7283        1206.00        1346.45          34.73
      1534        38.7491        1194.00        1298.55          34.55
      1535        38.7698        1316.00        1395.01          36.28
      1536        38.7906        1266.00        1332.76          35.58
      1537        38.8114        1171.00        1232.51          34.22
      1538        38.8321        1089.00        1161.65          33.00
      1539        38.8529        1082.00        1102.11          32.89
      1540        38.8736        1066.00        1071.99          32.65
      1541        38.8944        1081.00        1057.59          32.88
      1542        38.9152        1088.00        1049.84          32.98
      1543        38.9359        1078.00        1044.84          32.83
      1544        38.9567         991.00        1041.29          31.48
      1545        38.9774        1035.00        1046.19          32.17
      1546        38.9982        1005.00        1044.59          31.70
      1547        39.0190        1070.00        1043.54          32.71
      1548        39.0397        1035.00        1042.87          32.17
      1549        39.0605        1033.00        1042.52          32.14
      1550        39.0812        1016.00        1042.49          31.87
      1551        39.1020        1091.00        1043.07          33.03
      1552        39.1228         995.00        1043.36          31.54
      1553        39.1435        1026.00        1044.37          32.03
      1554        39.1643        1126.00        1045.80          33.56
      1555        39.1850        1058.00        1047.77          32.53
      1556        39.2058        1039.00        1050.72          32.23
      1557        39.2266        1084.00        1054.29          32.92
      1558        39.2473        1113.00        1059.07          33.36
      1559        39.2681        1138.00        1065.54          33.73
      1560        39.2888        1114.00        1074.52          33.38
      1561        39.3096        1109.00        1089.13          33.30
      1562        39.3304        1116.00        1108.55          33.41
      1563        39.3511        1161.00        1140.61          34.07
      1564        39.3719        1209.00        1202.32          34.77
      1565        39.3926        1297.00        1335.49          36.01
      1566        39.4134        1686.00        1622.08          41.06
      1567        39.4342        2356.00        2240.25          48.54
      1568        39.4549        2667.00        2874.96          51.64
      1569        39.4757        2215.00        2137.25          47.06
      1570        39.4964        1741.00        1695.67          41.73
      1571        39.5172        1606.00        1597.92          40.07
      1572        39.5380        1831.00        1805.51          42.79
      1573        39.5587        1925.00        2006.39          43.87
      1574        39.5795        1599.00        1588.38          39.99
      1575        39.6002        1370.00        1342.30          37.01
      1576        39.6210        1281.00        1224.75          35.79
      1577        39.6418        1234.00        1174.64          35.13
      1578        39.6625        1147.00        1159.43          33.87
      1579        39.6833        1105.00        1163.86          33.24
      1580        39.7040        1147.00        1186.07          33.87
      1581        39.7248        1212.00        1238.13          34.81
      1582        39.7456        1356.00        1358.47          36.82
      1583        39.7663        1549.00        1625.82          39.36
      1584        39.7871        2121.00        2130.18          46.05
      1585        39.8078        2738.00        2768.95          52.33
      1586        39.8286        2679.00        2681.65          51.76
      1587        39.8493        2099.00        2105.62          45.81
      1588        39.8701        1735.00        1823.38          41.65
      1589        39.8909        1880.00        1886.57          43.36
      1590        39.9116        2156.00        2127.49          46.43
      1591        39.9324        2092.00        2007.32          45.74
      1592        39.9532        1702.00        1638.21          41.26
      1593        39.9739        1323.00        1401.77          36.37
      1594        39.9947        1354.00        1298.53          36.80
      1595        40.0154        1224.00        1274.19          34.99
      1596        40.0362        1334.00        1286.34          36.52
      1597        40.0570        1315.00        1343.25          36.26
      1598        40.0777        1519.00        1533.07          38.97
      1599        40.0985        1896.00        1938.77          43.54
      1600        40.1192        2191.00        2382.07          46.81
      1601        40.1400        2099.00        2199.44          45.81
      1602        40.1608        1697.00        1721.03          41.19
      1603        40.1815        1440.00        1519.57          37.95
      1604        40.2023        1632.00        1596.30          40.40
      1605        40.2230        1643.00        1759.78          40.53
      1606        40.2438        1646.00        1633.12          40.57
      1607        40.2646        1404.00        1358.93          37.47
      1608        40.2853        1187.00        1198.02          34.45
      1609        40.3061        1176.00        1128.05          34.29
      1610        40.3268        1124.00        1096.47          33.53
      1611        40.3476        1109.00        1079.29          33.30
      1612        40.3684        1116.00        1068.96          33.41
      1613        40.3891        1082.00        1062.82          32.89
      1614        40.4099        1064.00        1059.66          32.62
      1615        40.4306        1078.00        1058.95          32.83
      1616        40.4514        1008.00        1060.61          31.75
      1617        40.4722        1020.00        1064.89          31.94
      1618        40.4929        1084.00        1072.47          32.92
      1619        40.5137        1050.00        1084.71          32.40
      1620        40.5344        1087.00        1104.25          32.97
      1621        40.5552        1142.00        1136.84          33.79
      1622        40.5760        1214.00        1199.87          34.84
      1623        40.5967        1321.00        1336.27          36.35
      1624        40.6175        1568.00        1629.54          39.60
      1625        40.6382        2043.00        2184.17          45.20
      1626        40.6590        2612.00        2832.12          51.11
      1627        40.6798        2296.00        2461.43          47.92
      1628        40.7005        1880.00        1832.07          43.36
      1629        40.7213        1612.00        1618.92          40.15
      1630        40.7420        1655.00        1726.15          40.68
      1631        40.7628        1891.00        1982.52          43.49
      1632        40.7836        1785.00        1791.47          42.25
      1633        40.8043        1457.00        1417.49          38.17
      1634        40.8251        1236.00        1221.56          35.16
      1635        40.8458        1197.00        1132.00          34.60
      1636        40.8666        1136.00        1088.81          33.70
      1637        40.8874        1040.00        1064.78          32.25
      1638        40.9081        1088.00        1049.38          32.98
      1639        40.9289        1064.00        1039.86          32.62
      1640        40.9496        1070.00        1032.05          32.71
      1641        40.9704        1096.00        1026.14          33.11
      1642        40.9911        1018.00        1021.53          31.91
      1643        41.0119         987.00        1017.87          31.42
      1644        41.0327        1037.00        1014.39          32.20
      1645        41.0534         964.00        1011.60          31.05
      1646        41.0742         987.00        1009.59          31.42
      1647        41.0950        1000.00        1007.90          31.62
      1648        41.1157         981.00        1005.96          31.32
      1649        41.1365         982.00        1004.54          31.34
      1650        41.1572        1001.00        1003.38          31.64
      1651        41.1780         997.00        1002.56          31.58
      1652        41.1988        1028.00        1001.87          32.06
      1653        41.2195        1054.00        1001.06          32.47
      1654        41.2403        1028.00        1000.64          32.06
      1655        41.2610        1013.00        1000.32          31.83
      1656        41.2818        1030.00         999.87          32.09
      1657        41.3026        1017.00         999.80          31.89
      1658        41.3233        1006.00         999.85          31.72
      1659        41.3441        1001.00        1000.01          31.64
      1660        41.3648        1067.00        1000.40          32.67
      1661        41.3856        1034.00        1000.90          32.16
      1662        41.4064        1044.00        1001.94          32.31
      1663        41.4271        1044.00        1002.78          32.31
      1664        41.4479        1018.00        1005.35          31.91
      1665        41.4686        1023.00        1010.23          31.98
      1666        41.4894        1043.00        1019.57          32.30
      1667        41.5102         985.00        1035.69          31.38
      1668        41.5309         998.00        1057.33          31.59
      1669        41.5517        1056.00        1074.92          32.50
      1670        41.5724        1100.00        1071.31          33.17
      1671        41.5932        1039.00        1054.00          32.23
      1672        41.6140        1016.00        1046.87          31.87
      1673        41.6347        1010.00        1050.09          31.78
      1674        41.6555        1046.00        1057.62          32.34
      1675        41.6762        1041.00        1059.35          32.26
      1676        41.6970        1069.00        1054.26          32.70
      1677        41.7178        1083.00        1053.92          32.91
      1678        41.7385        1050.00        1067.71          32.40
      1679        41.7593        1080.00        1092.08          32.86
      1680        41.7800        1094.00        1142.60          33.08
      1681        41.8008        1223.00        1244.01          34.97
      1682        41.8216        1405.00        1433.07          37.48
      1683        41.8423        1536.00        1720.51          39.19
      1684        41.8631        1727.00        1902.18          41.56
      1685        41.8838        1650.00        1667.43          40.62
      1686        41.9046        1419.00        1429.70          37.67
      1687        41.9254        1293.00        1355.83          35.96
      1688        41.9461        1332.00        1413.27          36.50
      1689        41.9669        1419.00        1497.97          37.67
      1690        41.9876        1381.00        1397.66          37.16
      1691        42.0084        1242.00        1244.63          35.24
      1692        42.0292        1174.00        1174.32          34.26
      1693        42.0499        1142.00        1185.30          33.79
      1694        42.0707        1129.00        1135.44          33.60
      1695        42.0914        1169.00        1078.67          34.19
      1696        42.1122        1069.00        1059.52          32.70
      1697        42.1330        1104.00        1059.25          33.23
      1698        42.1537        1072.00        1080.14          32.74
      1699        42.1745        1120.00        1079.84          33.47
      1700        42.1952        1029.00        1051.70          32.08
      1701        42.2160        1069.00        1041.26          32.70
      1702        42.2368        1078.00        1038.54          32.83
      1703        42.2575        1095.00        1038.43          33.09
      1704        42.2783        1050.00        1039.70          32.40
      1705        42.2990        1139.00        1041.92          33.75
      1706        42.3198        1086.00        1045.01          32.95
      1707        42.3406        1114.00        1048.95          33.38
      1708        42.3613        1133.00        1053.83          33.66
      1709        42.3821        1100.00        1059.78          33.17
      1710        42.4028        1117.00        1067.06          33.42
      1711        42.4236        1156.00        1075.79          34.00
      1712        42.4444        1155.00        1093.40          33.99
      1713        42.4651        1128.00        1106.72          33.59
      1714        42.4859        1206.00        1123.21          34.73
      1715        42.5066        1174.00        1143.94          34.26
      1716        42.5274        1320.00        1170.47          36.33
      1717        42.5482        1294.00        1205.17          35.97
      1718        42.5689        1376.00        1251.82          37.09
      1719        42.5897        1295.00        1316.43          35.99
      1720        42.6104        1340.00        1409.30          36.61
      1721        42.6312        1432.00        1551.38          37.84
      1722        42.6520        1649.00        1794.85          40.61
      1723        42.6727        2049.00        2283.54          45.27
      1724        42.6935        3085.00        3373.95          55.54
      1725        42.7142        5234.00        5589.36          72.35
      1726        42.7350        8232.00        8488.19          90.73
      1727        42.7558        8568.00        8294.38          92.56
      1728        42.7765        5819.00        5531.60          76.28
      1729        42.7973        3951.00        3902.27          62.86
      1730        42.8180        3936.00        3814.29          62.74
      1731        42.8388        4837.00        4809.86          69.55
      1732        42.8596        5464.00        5253.37          73.92
      1733        42.8803        4110.00        3868.41          64.11
      1734        42.9011        2775.00        2568.16          52.68
      1735        42.9218        2036.00        1896.40          45.12
      1736        42.9426        1733.00        1595.76          41.63
      1737        42.9634        1580.00        1454.38          39.75
      1738        42.9841        1427.00        1398.43          37.78
      1739        43.0049        1368.00        1394.17          36.99
      1740        43.0256        1467.00        1462.92          38.30
      1741        43.0464        1423.00        1605.63          37.72
      1742        43.0672        1701.00        1693.34          41.24
      1743        43.0879        1575.00        1546.23          39.69
      1744        43.1087        1459.00        1381.95          38.20
      1745        43.1294        1399.00        1322.51          37.40
      1746        43.1502        1305.00        1352.72          36.12
      1747        43.1710        1436.00        1409.18          37.89
      1748        43.1917        1359.00        1375.13          36.86
      1749        43.2125        1399.00        1275.61          37.40
      1750        43.2332        1462.00        1213.42          38.24
      1751        43.2540        1391.00        1186.81          37.30
      1752        43.2748        1352.00        1197.59          36.77
      1753        43.2955        1349.00        1199.99          36.73
      1754        43.3163        1359.00        1208.38          36.86
      1755        43.3370        1352.00        1222.08          36.77
      1756        43.3578        1382.00        1241.68          37.18
      1757        43.3786        1388.00        1268.91          37.26
      1758        43.3993        1462.00        1305.98          38.24
      1759        43.4201        1418.00        1354.49          37.66
      1760        43.4408        1455.00        1411.55          38.14
      1761        43.4616        1573.00        1479.75          39.66
      1762        43.4824        1489.00        1577.09          38.59
      1763        43.5031        1598.00        1728.56          39.97
      1764        43.5239        1782.00        1985.10          42.21
      1765        43.5446        2100.00        2467.16          45.83
      1766        43.5654        3038.00        3419.19          55.12
      1767        43.5862        4986.00        5294.49          70.61
      1768        43.6069        8721.00        8770.88          93.39
      1769        43.6277       11582.00       12248.90         107.62
      1770        43.6484        9202.00        9518.02          95.93
      1771        43.6692        5791.00        6140.08          76.10
      1772        43.6900        4683.00        4887.29          68.43
      1773        43.7107        5331.00        5290.93          73.01
      1774        43.7315        6837.00        6904.71          82.69
      1775        43.7522        6730.00        6938.83          82.04
      1776        43.7730        4745.00        4870.92          68.88
      1777        43.7938        3481.00        3644.67          59.00
      1778        43.8145        3078.00        3286.46          55.48
      1779        43.8353        3342.00        3598.77          57.81
      1780        43.8560        4830.00        4824.17          69.50
      1781        43.8768        8321.00        7722.83          91.22
      1782        43.8976       13250.00       13021.30         115.11
      1783        43.9183       15539.00       15756.20         124.66
      1784        43.9391       11355.00       10990.80         106.56
      1785        43.9598        7116.00        7019.28          84.36
      1786        43.9806        5897.00        5755.37          76.79
      1787        44.0014        7120.00        6744.18          84.38
      1788        44.0221        8882.00        8916.31          94.24
      1789        44.0429        7846.00        7764.68          88.58
      1790        44.0636        5326.00        4947.10          72.98
      1791        44.0844        3403.00        3220.18          58.34
      1792        44.1052        2468.00        2388.43          49.68
      1793        44.1259        2039.00        1986.42          45.16
      1794        44.1467        1743.00        1767.66          41.75
      1795        44.1674        1637.00        1635.63          40.46
      1796        44.1882        1619.00        1552.19          40.24
      1797        44.2090        1545.00        1500.31          39.31
      1798        44.2297        1514.00        1471.91          38.91
      1799        44.2505        1594.00        1463.95          39.92
      1800        44.2712        1591.00        1476.29          39.89
      1801        44.2920        1573.00        1513.36          39.66
      1802        44.3128        1578.00        1586.10          39.72
      1803        44.3335        1678.00        1720.47          40.96
      1804        44.3543        1865.00        1979.91          43.19
      1805        44.3750        2380.00        2524.26          48.79
      1806        44.3958        3657.00        3679.19          60.47
      1807        44.4166        5650.00        5685.44          75.17
      1808        44.4373        7928.00        8064.81          89.04
      1809        44.4581        7810.00        8009.10          88.37
      1810        44.4788        5450.00        5182.27          73.82
      1811        44.4996        3929.00        3769.07          62.68
      1812        44.5204        3754.00        3801.99          61.27
      1813        44.5411        4636.00        4710.78          68.09
      1814        44.5619        5496.00        5804.82          74.14
      1815        44.5826        4998.00        4969.26          70.70
      1816        44.6034        3426.00        3306.09          58.53
      1817        44.6242        2431.00        2324.42          49.31
      1818        44.6449        1894.00        1901.46          43.52
      1819        44.6657        1810.00        1780.14          42.54
      1820        44.6864        1749.00        1811.33          41.82
      1821        44.7072        1742.00        1744.72          41.74
      1822        44.7280        1586.00        1516.75          39.82
      1823        44.7487        1455.00        1351.16          38.14
      1824        44.7695        1316.00        1259.36          36.28
      1825        44.7902        1256.00        1207.46          35.44
      1826        44.8110        1207.00        1173.41          34.74
      1827        44.8318        1163.00        1151.09          34.10
      1828        44.8525        1130.00        1134.40          33.62
      1829        44.8733        1184.00        1121.05          34.41
      1830        44.8940        1166.00        1110.70          34.15
      1831        44.9148        1149.00        1102.39          33.90
      1832        44.9356        1013.00        1091.91          31.83
      1833        44.9563        1090.00        1086.77          33.02
      1834        44.9771        1121.00        1082.77          33.48
      1835        44.9978        1135.00        1080.34          33.69
      1836        45.0186        1082.00        1076.23          32.89
      1837        45.0394        1091.00        1079.01          33.03
      1838        45.0601        1061.00        1087.20          32.57
      1839        45.0809        1099.00        1112.24          33.15
      1840        45.1016        1124.00        1142.29          33.53
      1841        45.1224        1031.00        1129.30          32.11
      1842        45.1432        1098.00        1100.96          33.14
      1843        45.1639        1089.00        1095.23          33.00
      1844        45.1847        1094.00        1113.57          33.08
      1845        45.2054        1063.00        1161.81          32.60
      1846        45.2262        1065.00        1232.65          32.63
      1847        45.2470        1114.00        1284.95          33.38
      1848        45.2677        1072.00        1246.05          32.74
      1849        45.2885        1064.00        1165.23          32.62
      1850        45.3092        1082.00        1121.97          32.89
      1851        45.3300        1058.00        1117.37          32.53
      1852        45.3507        1078.00        1139.29          32.83
      1853        45.3715        1082.00        1156.02          32.89
      1854        45.3923        1109.00        1126.21          33.30
      1855        45.4130        1004.00        1089.66          31.69
      1856        45.4338        1109.00        1072.17          33.30
      1857        45.4546        1109.00        1070.61          33.30
      1858        45.4753        1124.00        1083.65          33.53
      1859        45.4961        1156.00        1123.03          34.00
      1860        45.5168        1215.00        1210.42          34.86
      1861        45.5376        1219.00        1293.47          34.91
      1862        45.5584        1203.00        1214.65          34.68
      1863        45.5791        1093.00        1122.64          33.06
      1864        45.5999        1091.00        1090.72          33.03
      1865        45.6206        1113.00        1100.30          33.36
      1866        45.6414        1133.00        1141.57          33.66
      1867        45.6622        1115.00        1161.44          33.39
      1868        45.6829        1096.00        1107.89          33.11
      1869        45.7037        1036.00        1065.86          32.19
      1870        45.7244        1136.00        1048.47          33.70
      1871        45.7452        1077.00        1040.26          32.82
      1872        45.7660        1033.00        1037.15          32.14
      1873        45.7867        1079.00        1035.36          32.85
      1874        45.8075        1119.00        1034.32          33.45
      1875        45.8282        1013.00        1033.83          31.83
      1876        45.8490        1075.00        1033.07          32.79
      1877        45.8698        1029.00        1033.48          32.08
      1878        45.8905        1105.00        1033.88          33.24
      1879        45.9113        1068.00        1034.22          32.68
      1880        45.9320        1050.00        1035.03          32.40
      1881        45.9528        1028.00        1037.06          32.06
      1882        45.9736        1071.00        1038.50          32.73
      1883        45.9943        1078.00        1040.31          32.83
      1884        46.0151        1026.00        1042.48          32.03
      1885        46.0358        1098.00        1045.46          33.14
      1886        46.0566        1081.00        1049.40          32.88
      1887        46.0774        1099.00        1056.56          33.15
      1888        46.0981        1024.00        1064.30          32.00
      1889        46.1189        1070.00        1076.15          32.71
      1890        46.1396        1072.00        1096.00          32.74
      1891        46.1604        1134.00        1133.66          33.67
      1892        46.1812        1297.00        1212.67          36.01
      1893        46.2019        1403.00        1375.88          37.46
      1894        46.2227        1556.00        1618.72          39.45
      1895        46.2434        1529.00        1630.47          39.10
      1896        46.2642        1360.00        1385.53          36.88
      1897        46.2850        1242.00        1244.53          35.24
      1898        46.3057        1252.00        1217.66          35.38
      1899        46.3265        1278.00        1274.48          35.75
      1900        46.3472        1351.00        1373.91          36.76
      1901        46.3680        1325.00        1336.04          36.40
      1902        46.3888        1228.00        1206.92          35.04
      1903        46.4095        1119.00        1133.85          33.45
      1904        46.4303        1172.00        1102.76          34.23
      1905        46.4510        1118.00        1089.72          33.44
      1906        46.4718        1064.00        1084.44          32.62
      1907        46.4925        1080.00        1083.60          32.86
      1908        46.5133        1100.00        1089.14          33.17
      1909        46.5341        1130.00        1095.72          33.62
      1910        46.5548        1183.00        1108.09          34.39
      1911        46.5756        1148.00        1131.12          33.88
      1912        46.5964        1176.00        1175.58          34.29
      1913        46.6171        1292.00        1262.77          35.94
      1914        46.6379        1475.00        1427.22          38.41
      1915        46.6586        1692.00        1638.79          41.13
      1916        46.6794        1654.00        1591.06          40.67
      1917        46.7002        1420.00        1378.09          37.68
      1918        46.7209        1325.00        1301.53          36.40
      1919        46.7417        1328.00        1311.14          36.44
      1920        46.7624        1427.00        1397.78          37.78
      1921        46.7832        1505.00        1534.08          38.79
      1922        46.8040        1535.00        1588.33          39.18
      1923        46.8247        1721.00        1705.40          41.48
      1924        46.8455        2114.00        2089.45          45.98
      1925        46.8662        2550.00        2560.92          50.50
      1926        46.8870        2393.00        2418.50          48.92
      1927        46.9078        1881.00        1897.97          43.37
      1928        46.9285        1506.00        1593.53          38.81
      1929        46.9493        1502.00        1546.13          38.76
      1930        46.9700        1697.00        1695.69          41.19
      1931        46.9908        1811.00        1890.93          42.56
      1932        47.0116        1840.00        1776.95          42.90
      1933        47.0323        1480.00        1503.62          38.47
      1934        47.0531        1320.00        1332.56          36.33
      1935        47.0738        1312.00        1258.04          36.22
      1936        47.0946        1197.00        1232.66          34.60
      1937        47.1154        1185.00        1234.97          34.42
      1938        47.1361        1179.00        1266.33          34.34
      1939        47.1569        1380.00        1344.71          37.15
      1940        47.1776        1521.00        1473.71          39.00
      1941        47.1984        1545.00        1525.89          39.31
      1942        47.2192        1429.00        1433.35          37.80
      1943        47.2399        1474.00        1377.70          38.39
      1944        47.2607        1534.00        1409.92          39.17
      1945        47.2814        1603.00        1519.71          40.04
      1946        47.3022        1618.00        1583.94          40.22
      1947        47.3230        1691.00        1589.31          41.12
      1948        47.3437        1581.00        1581.72          39.76
      1949        47.3645        1584.00        1655.58          39.80
      1950        47.3852        1857.00        1878.33          43.09
      1951        47.4060        2320.00        2375.06          48.17
      1952        47.4268        3133.00        3313.78          55.97
      1953        47.4475        4289.00        4612.11          65.49
      1954        47.4683        4604.00        4897.43          67.85
      1955        47.4890        3951.00        3984.89          62.86
      1956        47.5098        3552.00        3633.92          59.60
      1957        47.5306        4131.00        4334.06          64.27
      1958        47.5513        5552.00        6086.73          74.51
      1959        47.5721        7754.00        8236.66          88.06
      1960        47.5928        8886.00        8283.96          94.27
      1961        47.6136        7317.00        6086.32          85.54
      1962        47.6343        4748.00        4332.96          68.91
      1963        47.6551        3341.00        3646.28          57.80
      1964        47.6759        3400.00        3795.75          58.31
      1965        47.6966        3911.00        4298.84          62.54
      1966        47.7174        4231.00        4150.40          65.05
      1967        47.7382        3743.00        3220.07          61.18
      1968        47.7589        2601.00        2401.25          51.00
      1969        47.7797        1918.00        1901.70          43.79
      1970        47.8004        1537.00        1629.52          39.20
      1971        47.8212        1387.00        1481.68          37.24
      1972        47.8420        1308.00        1397.83          36.17
      1973        47.8627        1285.00        1352.16          35.85
      1974        47.8835        1286.00        1340.38          35.86
      1975        47.9042        1365.00        1363.87          36.95
      1976        47.9250        1305.00        1394.18          36.12
      1977        47.9458        1340.00        1352.22          36.61
      1978        47.9665        1206.00        1276.04          34.73
      1979        47.9873        1198.00        1226.55          34.61
      1980        48.0080        1199.00        1208.20          34.63
      1981        48.0288        1212.00        1215.06          34.81
      1982        48.0496        1268.00        1230.23          35.61
      1983        48.0703        1286.00        1212.35          35.86
      1984        48.0911        1124.00        1173.24          33.53
      1985        48.1118        1153.00        1144.20          33.96
      1986        48.1326        1124.00        1127.27          33.53
      1987        48.1534        1077.00        1117.07          32.82
      1988        48.1741        1186.00        1110.06          34.44
      1989        48.1949        1062.00        1104.60          32.59
      1990        48.2156        1127.00        1116.33          33.57
      1991        48.2364        1128.00        1113.47          33.59
      1992        48.2572        1104.00        1114.32          33.23
      1993        48.2779        1124.00        1112.66          33.53
      1994        48.2987        1103.00        1111.37          33.21
      1995        48.3194        1077.00        1110.82          32.82
      1996        48.3402        1085.00        1112.35          32.94
      1997        48.3610        1081.00        1112.18          32.88
      1998        48.3817        1079.00        1112.28          32.85
      1999        48.4025        1008.00        1112.65          31.75
      2000        48.4232        1097.00        1112.24          33.12
      2001        48.4440        1143.00        1113.05          33.81
      2002        48.4648        1131.00        1114.25          33.63
      2003        48.4855        1122.00        1116.77          33.50
      2004        48.5063        1077.00        1118.59          32.82
      2005        48.5270        1077.00        1120.75          32.82
      2006        48.5478        1146.00        1122.79          33.85
      2007        48.5686        1136.00        1125.75          33.70
      2008        48.5893        1132.00        1129.32          33.65
      2009        48.6101        1190.00        1136.90          34.50
      2010        48.6308        1102.00        1142.36          33.20
      2011        48.6516        1200.00        1149.53          34.64
      2012        48.6724        1194.00        1159.78          34.55
      2013        48.6931        1179.00        1178.93          34.34
      2014        48.7139        1226.00        1208.76          35.01
      2015        48.7346        1263.00        1234.70          35.54
      2016        48.7554        1297.00        1220.06          36.01
      2017        48.7761        1255.00        1213.22          35.43
      2018        48.7969        1353.00        1218.95          36.78
      2019        48.8177        1342.00        1235.84          36.63
      2020        48.8384        1467.00        1262.34          38.30
      2021        48.8592        1501.00        1292.29          38.74
      2022        48.8800        1646.00        1310.41          40.57
      2023        48.9007        1789.00        1339.00          42.30
      2024        48.9215        1959.00        1389.09          44.26
      2025        48.9422        2093.00        1465.53          45.75
      2026        48.9630        2211.00        1571.74          47.02
      2027        48.9838        2211.00        1686.67          47.02
      2028        49.0045        2267.00        1737.31          47.61
      2029        49.0253        2281.00        1811.83          47.76
      2030        49.0460        2426.00        1992.31          49.25
      2031        49.0668        2836.00        2339.15          53.25
      2032        49.0876        3440.00        2974.72          58.65
      2033        49.1083        4373.00        4124.18          66.13
      2034        49.1291        6069.00        6123.70          77.90
      2035        49.1498        8712.00        9078.32          93.34
      2036        49.1706       11196.00       11307.30         105.81
      2037        49.1914       10390.00        9767.28         101.93
      2038        49.2121        7131.00        6864.80          84.45
      2039        49.2329        5310.00        5382.99          72.87
      2040        49.2536        5182.00        5538.54          71.99
      2041        49.2744        6338.00        6754.89          79.61
      2042        49.2952        7675.00        7620.10          87.61
      2043        49.3159        7289.00        6717.83          85.38
      2044        49.3367        5155.00        4777.04          71.80
      2045        49.3574        3370.00        3421.26          58.05
      2046        49.3782        2694.00        2830.24          51.90
      2047        49.3990        2629.00        2679.83          51.27
      2048        49.4197        2629.00        2493.65          51.27
      2049        49.4405        2403.00        2184.70          49.02
      2050        49.4612        2121.00        1987.47          46.05
      2051        49.4820        1896.00        1916.22          43.54
      2052        49.5028        1856.00        1937.91          43.08
      2053        49.5235        1949.00        2048.30          44.15
      2054        49.5443        2105.00        2284.28          45.88
      2055        49.5650        2831.00        2769.85          53.21
      2056        49.5858        3939.00        3842.14          62.76
      2057        49.6066        6920.00        6156.35          83.19
      2058        49.6273       11596.00       10008.60         107.68
      2059        49.6481       13778.00       12797.80         117.38
      2060        49.6688       10281.00       10314.30         101.39
      2061        49.6896        6253.00        6492.39          79.08
      2062        49.7104        4462.00        4577.45          66.80
      2063        49.7311        4691.00        4486.78          68.49
      2064        49.7519        6284.00        5755.37          79.27
      2065        49.7726        7854.00        7335.88          88.62
      2066        49.7934        6969.00        6736.39          83.48
      2067        49.8142        4556.00        4520.02          67.50
      2068        49.8349        3004.00        2959.11          54.81
      2069        49.8557        2217.00        2225.91          47.08
      2070        49.8764        1894.00        1908.78          43.52
      2071        49.8972        1703.00        1745.57          41.27
      2072        49.9180        1501.00        1616.59          38.74
      2073        49.9387        1433.00        1504.78          37.85
      2074        49.9595        1403.00        1419.97          37.46
      2075        49.9802        1330.00        1360.14          36.47
      2076        50.0010        1293.00        1317.98          35.96
      2077        50.0218        1270.00        1287.15          35.64
      2078        50.0425        1260.00        1263.65          35.50
      2079        50.0633        1205.00        1245.14          34.71
      2080        50.0840        1212.00        1230.65          34.81
      2081        50.1048        1181.00        1218.69          34.37
      2082        50.1256        1209.00        1209.05          34.77
      2083        50.1463        1193.00        1201.36          34.54
      2084        50.1671        1216.00        1195.38          34.87
      2085        50.1878        1173.00        1190.99          34.25
      2086        50.2086        1113.00        1188.17          33.36
      2087        50.2294        1161.00        1187.32          34.07
      2088        50.2501        1161.00        1185.75          34.07
      2089        50.2709        1172.00        1189.48          34.23
      2090        50.2916        1148.00        1198.39          33.88
      2091        50.3124        1127.00        1215.30          33.57
      2092        50.3332        1168.00        1247.72          34.18
      2093        50.3539        1224.00        1304.18          34.99
      2094        50.3747        1320.00        1375.64          36.33
      2095        50.3954        1281.00        1414.46          35.79
      2096        50.4162        1342.00        1371.03          36.63
      2097        50.4370        1174.00        1329.23          34.26
      2098        50.4577        1256.00        1339.07          35.44
      2099        50.4785        1299.00        1414.27          36.04
      2100        50.4992        1451.00        1582.92          38.09
      2101        50.5200        1648.00        1879.87          40.60
      2102        50.5408        2039.00        2241.71          45.16
      2103        50.5615        2299.00        2369.66          47.95
      2104        50.5823        1949.00        2068.25          44.15
      2105        50.6030        1671.00        1730.52          40.88
      2106        50.6238        1570.00        1566.71          39.62
      2107        50.6446        1515.00        1573.22          38.92
      2108        50.6653        1684.00        1705.68          41.04
      2109        50.6861        1782.00        1854.14          42.21
      2110        50.7068        1754.00        1812.85          41.88
      2111        50.7276        1632.00        1663.30          40.40
      2112        50.7484        1531.00        1590.64          39.13
      2113        50.7691        1689.00        1643.11          41.10
      2114        50.7899        1789.00        1831.33          42.30
      2115        50.8106        2035.00        2055.71          45.11
      2116        50.8314        2235.00        2149.93          47.28
      2117        50.8521        2376.00        2307.34          48.74
      2118        50.8729        2800.00        2805.11          52.92
      2119        50.8937        3473.00        3733.72          58.93
      2120        50.9144        4663.00        4915.67          68.29
      2121        50.9352        5492.00        5448.07          74.11
      2122        50.9560        5254.00        4611.15          72.48
      2123        50.9767        3737.00        3460.55          61.13
      2124        50.9975        2827.00        2806.77          53.17
      2125        51.0182        2529.00        2710.01          50.29
      2126        51.0390        2674.00        3009.89          51.71
      2127        51.0598        3198.00        3349.21          56.55
      2128        51.0805        3308.00        3148.86          57.52
      2129        51.1013        2704.00        2520.10          52.00
      2130        51.1220        1969.00        1995.66          44.37
      2131        51.1428        1559.00        1692.01          39.48
      2132        51.1636        1454.00        1550.57          38.13
      2133        51.1843        1404.00        1519.93          37.47
      2134        51.2051        1433.00        1579.89          37.85
      2135        51.2258        1718.00        1762.90          41.45
      2136        51.2466        1919.00        2045.12          43.81
      2137        51.2674        2088.00        2115.19          45.69
      2138        51.2881        1869.00        1828.83          43.23
      2139        51.3089        1586.00        1576.98          39.82
      2140        51.3296        1459.00        1463.49          38.20
      2141        51.3504        1367.00        1463.01          36.97
      2142        51.3712        1542.00        1555.61          39.27
      2143        51.3919        1623.00        1663.85          40.29
      2144        51.4127        1652.00        1597.97          40.64
      2145        51.4334        1469.00        1440.18          38.33
      2146        51.4542        1313.00        1337.33          36.24
      2147        51.4750        1290.00        1288.49          35.92
      2148        51.4957        1238.00        1271.26          35.19
      2149        51.5165        1263.00        1272.25          35.54
      2150        51.5372        1203.00        1287.18          34.68
      2151        51.5580        1292.00        1317.62          35.94
      2152        51.5788        1263.00        1370.88          35.54
      2153        51.5995        1336.00        1466.19          36.55
      2154        51.6203        1538.00        1651.20          39.22
      2155        51.6410        1956.00        2032.99          44.23
      2156        51.6618        2665.00        2755.62          51.62
      2157        51.6826        3288.00        3615.17          57.34
      2158        51.7033        3510.00        3566.09          59.25
      2159        51.7241        2703.00        2734.81          51.99
      2160        51.7448        2065.00        2135.93          45.44
      2161        51.7656        1850.00        1928.97          43.01
      2162        51.7864        1889.00        2041.44          43.46
      2163        51.8071        2285.00        2436.32          47.80
      2164        51.8279        2612.00        2840.14          51.11
      2165        51.8486        2834.00        2823.01          53.24
      2166        51.8694        2881.00        2742.12          53.67
      2167        51.8902        2574.00        2668.58          50.73
      2168        51.9109        2187.00        2308.08          46.77
      2169        51.9317        1773.00        1915.82          42.11
      2170        51.9524        1612.00        1694.30          40.15
      2171        51.9732        1656.00        1650.92          40.69
      2172        51.9939        1816.00        1752.88          42.61
      2173        52.0147        1973.00        1910.07          44.42
      2174        52.0355        2105.00        1913.79          45.88
      2175        52.0562        1812.00        1743.59          42.57
      2176        52.0770        1831.00        1597.87          42.79
      2177        52.0978        1895.00        1550.72          43.53
      2178        52.1185        2001.00        1609.14          44.73
      2179        52.1393        2118.00        1775.82          46.02
      2180        52.1600        2119.00        2038.28          46.03
      2181        52.1808        2488.00        2303.98          49.88
      2182        52.2016        2471.00        2538.17          49.71
      2183        52.2223        3042.00        3070.60          55.15
      2184        52.2431        4185.00        4131.20          64.69
      2185        52.2638        5355.00        5142.55          73.18
      2186        52.2846        5066.00        4902.48          71.18
      2187        52.3054        3607.00        3783.47          60.06
      2188        52.3261        2702.00        2881.17          51.98
      2189        52.3469        2246.00        2462.83          47.39
      2190        52.3676        2403.00        2538.94          49.02
      2191        52.3884        2735.00        2970.89          52.30
      2192        52.4092        3320.00        3236.84          57.62
      2193        52.4299        2887.00        2833.77          53.73
      2194        52.4507        2116.00        2180.29          46.00
      2195        52.4714        1659.00        1722.10          40.73
      2196        52.4922        1415.00        1486.00          37.62
      2197        52.5130        1348.00        1375.60          36.72
      2198        52.5337        1313.00        1319.37          36.24
      2199        52.5545        1263.00        1286.44          35.54
      2200        52.5752        1277.00        1265.93          35.74
      2201        52.5960        1240.00        1253.77          35.21
      2202        52.6168        1240.00        1247.46          35.21
      2203        52.6375        1242.00        1248.00          35.24
      2204        52.6583        1308.00        1254.58          36.17
      2205        52.6790        1221.00        1267.72          34.94
      2206        52.6998        1324.00        1289.10          36.39
      2207        52.7206        1286.00        1321.27          35.86
      2208        52.7413        1276.00        1369.11          35.72
      2209        52.7621        1356.00        1441.29          36.82
      2210        52.7828        1417.00        1559.78          37.64
      2211        52.8036        1645.00        1767.95          40.56
      2212        52.8244        2029.00        2168.76          45.04
      2213        52.8451        3035.00        2947.60          55.09
      2214        52.8659        4313.00        4258.12          65.67
      2215        52.8866        5749.00        5736.08          75.82
      2216        52.9074        5361.00        5668.05          73.22
      2217        52.9282        3963.00        4095.37          62.95
      2218        52.9489        2805.00        2930.00          52.96
      2219        52.9697        2445.00        2490.75          49.45
      2220        52.9904        2643.00        2601.13          51.41
      2221        53.0112        3130.00        3118.32          55.95
      2222        53.0320        3606.00        3670.31          60.05
      2223        53.0527        3196.00        3345.23          56.53
      2224        53.0735        2530.00        2485.59          50.30
      2225        53.0942        1868.00        1891.61          43.22
      2226        53.1150        1544.00        1591.84          39.29
      2227        53.1357        1311.00        1442.77          36.21
      2228        53.1565        1329.00        1363.77          36.46
      2229        53.1773        1308.00        1320.53          36.17
      2230        53.1980        1240.00        1303.22          35.21
      2231        53.2188        1306.00        1316.02          36.14
      2232        53.2396        1368.00        1377.96          36.99
      2233        53.2603        1541.00        1513.97          39.26
      2234        53.2811        1688.00        1699.05          41.09
      2235        53.3018        1734.00        1740.24          41.64
      2236        53.3226        1534.00        1550.98          39.17
      2237        53.3434        1372.00        1379.11          37.04
      2238        53.3641        1248.00        1298.06          35.33
      2239        53.3849        1300.00        1291.36          36.06
      2240        53.4056        1287.00        1343.73          35.87
      2241        53.4264        1486.00        1421.55          38.55
      2242        53.4472        1401.00        1415.30          37.43
      2243        53.4679        1332.00        1311.35          36.50
      2244        53.4887        1239.00        1224.84          35.20
      2245        53.5094        1200.00        1177.45          34.64
      2246        53.5302        1231.00        1155.84          35.09
      2247        53.5510        1167.00        1144.15          34.16
      2248        53.5717        1150.00        1137.44          33.91
      2249        53.5925        1156.00        1131.97          34.00
      2250        53.6132        1110.00        1130.56          33.32
      2251        53.6340        1100.00        1130.70          33.17
      2252        53.6548        1157.00        1132.23          34.01
      2253        53.6755        1118.00        1135.11          33.44
      2254        53.6963        1134.00        1139.49          33.67
      2255        53.7170        1127.00        1145.44          33.57
      2256        53.7378        1172.00        1153.02          34.23
      2257        53.7586        1220.00        1164.51          34.93
      2258        53.7793        1188.00        1180.28          34.47
      2259        53.8001        1206.00        1202.21          34.73
      2260        53.8208        1232.00        1231.74          35.10
      2261        53.8416        1191.00        1267.54          34.51
      2262        53.8624        1322.00        1306.90          36.36
      2263        53.8831        1250.00        1360.18          35.36
      2264        53.9039        1367.00        1449.38          36.97
      2265        53.9246        1613.00        1612.38          40.16
      2266        53.9454        1871.00        1932.02          43.26
      2267        53.9662        2553.00        2548.77          50.53
      2268        53.9869        3827.00        3556.75          61.86
      2269        54.0077        4988.00        4551.72          70.63
      2270        54.0284        4676.00        4454.56          68.38
      2271        54.0492        3418.00        3466.24          58.46
      2272        54.0700        2526.00        2652.55          50.26
      2273        54.0907        2219.00        2326.95          47.11
      2274        54.1115        2312.00        2456.81          48.08
      2275        54.1322        2780.00        2869.40          52.73
      2276        54.1530        3217.00        3175.48          56.72
      2277        54.1738        3108.00        2959.72          55.75
      2278        54.1945        2389.00        2364.61          48.88
      2279        54.2153        1769.00        1877.63          42.06
      2280        54.2360        1521.00        1610.96          39.00
      2281        54.2568        1344.00        1505.90          36.66
      2282        54.2775        1327.00        1454.13          36.43
      2283        54.2983        1192.00        1361.77          34.53
      2284        54.3191        1238.00        1285.99          35.19
      2285        54.3398        1150.00        1240.13          33.91
      2286        54.3606        1150.00        1213.53          33.91
      2287        54.3814        1171.00        1198.75          34.22
      2288        54.4021        1193.00        1192.73          34.54
      2289        54.4229        1145.00        1194.78          33.84
      2290        54.4436        1097.00        1204.34          33.12
      2291        54.4644        1106.00        1225.26          33.26
      2292        54.4852        1211.00        1264.90          34.80
      2293        54.5059        1344.00        1346.16          36.66
      2294        54.5267        1522.00        1519.35          39.01
      2295        54.5474        1867.00        1855.43          43.21
      2296        54.5682        2371.00        2355.05          48.69
      2297        54.5890        2516.00        2670.80          50.16
      2298        54.6097        2122.00        2375.35          46.07
      2299        54.6305        1726.00        1900.08          41.55
      2300        54.6512        1597.00        1602.71          39.96
      2301        54.6720        1487.00        1508.65          38.56
      2302        54.6928        1557.00        1583.04          39.46
      2303        54.7135        1697.00        1779.93          41.19
      2304        54.7343        1911.00        1920.32          43.72
      2305        54.7550        1706.00        1767.30          41.30
      2306        54.7758        1396.00        1510.31          37.36
      2307        54.7966        1346.00        1330.26          36.69
      2308        54.8173        1207.00        1233.15          34.74
      2309        54.8381        1157.00        1184.93          34.01
      2310        54.8588        1148.00        1159.35          33.88
      2311        54.8796        1148.00        1143.95          33.88
      2312        54.9004        1083.00        1134.01          32.91
      2313        54.9211        1110.00        1127.86          33.32
      2314        54.9419        1081.00        1123.90          32.88
      2315        54.9626        1071.00        1121.93          32.73
      2316        54.9834        1129.00        1121.67          33.60
      2317        55.0042        1145.00        1123.10          33.84
      2318        55.0249        1024.00        1126.45          32.00
      2319        55.0457        1072.00        1132.36          32.74
      2320        55.0664        1152.00        1142.61          33.94
      2321        55.0872        1079.00        1160.13          32.85
      2322        55.1080        1150.00        1190.39          33.91
      2323        55.1287        1222.00        1236.75          34.96
      2324        55.1495        1159.00        1286.59          34.04
      2325        55.1702        1181.00        1299.12          34.37
      2326        55.1910        1170.00        1274.08          34.21
      2327        55.2118        1152.00        1254.00          33.94
      2328        55.2325        1219.00        1256.76          34.91
      2329        55.2533        1216.00        1284.52          34.87
      2330        55.2740        1255.00        1338.65          35.43
      2331        55.2948        1453.00        1421.79          38.12
      2332        55.3156        1517.00        1534.80          38.95
      2333        55.3363        1871.00        1722.57          43.26
      2334        55.3571        2362.00        2091.78          48.60
      2335        55.3778        3090.00        2726.69          55.59
      2336        55.3986        4209.00        3473.27          64.88
      2337        55.4194        4564.00        3707.79          67.56
      2338        55.4401        3486.00        3130.36          59.04
      2339        55.4609        2615.00        2486.32          51.14
      2340        55.4816        2196.00        2184.28          46.86
      2341        55.5024        2295.00        2263.83          47.91
      2342        55.5232        3009.00        2717.92          54.85
      2343        55.5439        3940.00        3455.63          62.77
      2344        55.5647        4506.00        3973.00          67.13
      2345        55.5854        4067.00        3639.64          63.77
      2346        55.6062        3231.00        3107.91          56.84
      2347        55.6270        3031.00        3030.14          55.05
      2348        55.6477        3243.00        3424.00          56.95
      2349        55.6685        4040.00        3956.45          63.56
      2350        55.6892        4531.00        4110.04          67.31
      2351        55.7100        4146.00        3767.27          64.39
      2352        55.7308        3468.00        3103.60          58.89
      2353        55.7515        2522.00        2503.98          50.22
      2354        55.7723        2245.00        2247.05          47.38
      2355        55.7930        2227.00        2294.29          47.19
      2356        55.8138        2486.00        2465.24          49.86
      2357        55.8346        2582.00        2478.31          50.81
      2358        55.8553        2382.00        2230.78          48.81
      2359        55.8761        1938.00        1880.58          44.02
      2360        55.8968        1651.00        1598.90          40.63
      2361        55.9176        1461.00        1431.83          38.22
      2362        55.9384        1330.00        1352.75          36.47
      2363        55.9591        1341.00        1335.64          36.62
      2364        55.9799        1351.00        1376.70          36.76
      2365        56.0006        1465.00        1481.40          38.28
      2366        56.0214        1509.00        1564.47          38.85
      2367        56.0422        1367.00        1458.02          36.97
      2368        56.0629        1267.00        1315.96          35.59
      2369        56.0837        1191.00        1236.92          34.51
      2370        56.1044        1185.00        1206.66          34.42
      2371        56.1252        1184.00        1212.35          34.41
      2372        56.1460        1217.00        1252.33          34.89
      2373        56.1667        1234.00        1303.97          35.13
      2374        56.1875        1265.00        1276.28          35.57
      2375        56.2082        1230.00        1200.00          35.07
      2376        56.2290        1144.00        1149.30          33.82
      2377        56.2498        1132.00        1122.52          33.65
      2378        56.2705        1055.00        1108.54          32.48
      2379        56.2913        1035.00        1100.95          32.17
      2380        56.3120        1051.00        1096.87          32.42
      2381        56.3328        1093.00        1096.37          33.06
      2382        56.3535        1094.00        1096.72          33.08
      2383        56.3743        1032.00        1099.10          32.12
      2384        56.3951        1081.00        1103.82          32.88
      2385        56.4158        1079.00        1111.64          32.85
      2386        56.4366        1113.00        1123.96          33.36
      2387        56.4574        1181.00        1143.64          34.37
      2388        56.4781        1205.00        1177.09          34.71
      2389        56.4989        1234.00        1244.03          35.13
      2390        56.5196        1486.00        1365.03          38.55
      2391        56.5404        1823.00        1588.84          42.70
      2392        56.5612        2217.00        1920.11          47.08
      2393        56.5819        2287.00        2079.32          47.82
      2394        56.6027        1861.00        1824.63          43.14
      2395        56.6234        1485.00        1536.31          38.54
      2396        56.6442        1426.00        1378.76          37.76
      2397        56.6650        1445.00        1331.06          38.01
      2398        56.6857        1435.00        1372.66          37.88
      2399        56.7065        1617.00        1493.47          40.21
      2400        56.7272        1756.00        1613.07          41.90
      2401        56.7480        1625.00        1540.49          40.31
      2402        56.7688        1408.00        1378.82          37.52
      2403        56.7895        1305.00        1274.45          36.12
      2404        56.8103        1206.00        1229.56          34.73
      2405        56.8310        1215.00        1220.62          34.86
      2406        56.8518        1239.00        1220.24          35.20
      2407        56.8726        1187.00        1206.82          34.45
      2408        56.8933        1220.00        1190.86          34.93
      2409        56.9141        1167.00        1184.33          34.16
      2410        56.9348        1236.00        1192.15          35.16
      2411        56.9556        1192.00        1215.84          34.53
      2412        56.9764        1253.00        1259.01          35.40
      2413        56.9971        1373.00        1327.70          37.05
      2414        57.0179        1534.00        1437.19          39.17
      2415        57.0386        1668.00        1629.83          40.84
      2416        57.0594        1954.00        1965.52          44.20
      2417        57.0802        2232.00        2435.73          47.24
      2418        57.1009        2617.00        2755.35          51.16
      2419        57.1217        2679.00        2537.70          51.76
      2420        57.1424        2331.00        2129.58          48.28
      2421        57.1632        2231.00        1881.19          47.23
      2422        57.1840        2139.00        1802.03          46.25
      2423        57.2047        2050.00        1825.53          45.28
      2424        57.2255        2130.00        1933.16          46.15
      2425        57.2462        2104.00        2070.63          45.87
      2426        57.2670        2134.00        2030.68          46.20
      2427        57.2878        2087.00        1805.90          45.68
      2428        57.3085        1799.00        1620.09          42.41
      2429        57.3293        1744.00        1527.70          41.76
      2430        57.3500        1723.00        1488.77          41.51
      2431        57.3708        1556.00        1472.50          39.45
      2432        57.3916        1532.00        1484.50          39.14
      2433        57.4123        1647.00        1544.70          40.58
      2434        57.4331        1653.00        1686.71          40.66
      2435        57.4538        1928.00        1979.37          43.91
      2436        57.4746        2609.00        2557.10          51.08
      2437        57.4953        3675.00        3595.82          60.62
      2438        57.5161        5043.00        4989.06          71.01
      2439        57.5369        5412.00        5589.86          73.57
      2440        57.5576        4055.00        4585.14          63.68
      2441        57.5784        3026.00        3350.05          55.01
      2442        57.5992        2565.00        2663.45          50.65
      2443        57.6199        2406.00        2475.37          49.05
      2444        57.6407        2669.00        2663.38          51.66
      2445        57.6614        3095.00        3127.54          55.63
      2446        57.6822        3589.00        3575.14          59.91
      2447        57.7030        3201.00        3348.89          56.58
      2448        57.7237        2489.00        2619.64          49.89
      2449        57.7445        1924.00        2065.46          43.86
      2450        57.7652        1698.00        1772.81          41.21
      2451        57.7860        1637.00        1651.47          40.46
      2452        57.8068        1602.00        1615.88          40.03
      2453        57.8275        1615.00        1647.08          40.19
      2454        57.8483        1760.00        1803.96          41.95
      2455        57.8690        2179.00        2127.96          46.68
      2456        57.8898        2582.00        2502.01          50.81
      2457        57.9106        2670.00        2556.05          51.67
      2458        57.9313        2099.00        2191.26          45.81
      2459        57.9521        1785.00        1791.91          42.25
      2460        57.9728        1560.00        1557.10          39.50
      2461        57.9936        1525.00        1485.92          39.05
      2462        58.0144        1521.00        1550.04          39.00
      2463        58.0351        1602.00        1710.67          40.03
      2464        58.0559        1894.00        1834.31          43.52
      2465        58.0766        1768.00        1746.15          42.05
      2466        58.0974        1504.00        1524.82          38.78
      2467        58.1182        1321.00        1345.42          36.35
      2468        58.1389        1283.00        1245.03          35.82
      2469        58.1597        1154.00        1204.89          33.97
      2470        58.1804        1264.00        1203.26          35.55
      2471        58.2012        1143.00        1216.09          33.81
      2472        58.2220        1112.00        1204.43          33.35
      2473        58.2427        1089.00        1164.79          33.00
      2474        58.2635        1134.00        1130.01          33.67
      2475        58.2842        1107.00        1111.45          33.27
      2476        58.3050        1118.00        1108.98          33.44
      2477        58.3258        1078.00        1121.93          32.83
      2478        58.3465        1132.00        1148.11          33.65
      2479        58.3673        1157.00        1173.31          34.01
      2480        58.3880        1163.00        1186.21          34.10
      2481        58.4088        1204.00        1205.80          34.70
      2482        58.4296        1248.00        1232.46          35.33
      2483        58.4503        1276.00        1228.48          35.72
      2484        58.4711        1191.00        1185.71          34.51
      2485        58.4918        1142.00        1143.10          33.79
      2486        58.5126        1145.00        1120.35          33.84
      2487        58.5334        1125.00        1112.35          33.54
      2488        58.5541        1052.00        1120.16          32.43
      2489        58.5749        1204.00        1141.71          34.70
      2490        58.5956        1224.00        1164.52          34.99
      2491        58.6164        1190.00        1172.74          34.50
      2492        58.6371        1236.00        1179.80          35.16
      2493        58.6579        1207.00        1215.89          34.74
      2494        58.6787        1228.00        1286.68          35.04
      2495        58.6994        1369.00        1377.55          37.00
      2496        58.7202        1458.00        1428.47          38.18
      2497        58.7410        1422.00        1384.99          37.71
      2498        58.7617        1323.00        1293.09          36.37
      2499        58.7825        1188.00        1218.65          34.47
      2500        58.8032        1161.00        1183.52          34.07
      2501        58.8240        1182.00        1187.79          34.38
      2502        58.8448        1100.00        1222.77          33.17
      2503        58.8655        1310.00        1271.25          36.19
      2504        58.8863        1272.00        1302.74          35.67
      2505        58.9070        1328.00        1298.08          36.44
      2506        58.9278        1327.00        1308.62          36.43
      2507        58.9486        1373.00        1384.53          37.05
      2508        58.9693        1691.00        1555.49          41.12
      2509        58.9901        1792.00        1752.99          42.33
      2510        59.0108        1708.00        1706.64          41.33
      2511        59.0316        1441.00        1481.83          37.96
      2512        59.0524        1337.00        1317.02          36.56
      2513        59.0731        1208.00        1237.64          34.76
      2514        59.0939        1246.00        1221.18          35.30
      2515        59.1146        1313.00        1258.27          36.24
      2516        59.1354        1385.00        1345.75          37.22
      2517        59.1562        1526.00        1418.88          39.06
      2518        59.1769        1422.00        1353.43          37.71
      2519        59.1977        1224.00        1238.07          34.99
      2520        59.2184        1092.00        1161.02          33.05
      2521        59.2392        1122.00        1119.33          33.50
      2522        59.2600        1132.00        1097.95          33.65
      2523        59.2807        1065.00        1086.49          32.63
      2524        59.3015        1105.00        1081.31          33.24
      2525        59.3222        1063.00        1079.57          32.60
      2526        59.3430        1074.00        1080.74          32.77
      2527        59.3638        1136.00        1084.66          33.70
      2528        59.3845        1136.00        1091.43          33.70
      2529        59.4053        1073.00        1101.65          32.76
      2530        59.4260        1155.00        1116.51          33.99
      2531        59.4468        1137.00        1139.63          33.72
      2532        59.4676        1161.00        1178.06          34.07
      2533        59.4883        1265.00        1246.82          35.57
      2534        59.5091        1366.00        1369.83          36.96
      2535        59.5298        1584.00        1565.36          39.80
      2536        59.5506        1911.00        1789.94          43.72
      2537        59.5714        1961.00        1864.76          44.28
      2538        59.5921        1818.00        1721.70          42.64
      2539        59.6129        1508.00        1540.81          38.83
      2540        59.6336        1411.00        1431.26          37.56
      2541        59.6544        1406.00        1406.60          37.50
      2542        59.6752        1410.00        1460.44          37.55
      2543        59.6959        1543.00        1586.20          39.28
      2544        59.7167        1776.00        1753.12          42.14
      2545        59.7374        1815.00        1890.27          42.60
      2546        59.7582        1892.00        2044.18          43.50
      2547        59.7789        2404.00        2399.55          49.03
      2548        59.7997        3243.00        3083.35          56.95
      2549        59.8205        4221.00        3921.47          64.97
      2550        59.8412        4234.00        4085.96          65.07
      2551        59.8620        3387.00        3372.15          58.20
      2552        59.8828        2594.00        2612.40          50.93
      2553        59.9035        2260.00        2154.18          47.54
      2554        59.9243        2146.00        1993.82          46.32
      2555        59.9450        2257.00        2089.67          47.51
      2556        59.9658        2701.00        2412.37          51.97
      2557        59.9866        3149.00        2812.06          56.12
      2558        60.0073        3136.00        2859.50          56.00
      2559        60.0281        2911.00        2553.19          53.95
      2560        60.0488        2637.00        2312.21          51.35
      2561        60.0696        2673.00        2292.71          51.70
      2562        60.0904        2944.00        2542.40          54.26
      2563        60.1111        3639.00        3132.73          60.32
      2564        60.1319        4598.00        4069.56          67.81
      2565        60.1526        6067.00        5073.33          77.89
      2566        60.1734        6781.00        5439.43          82.35
      2567        60.1942        5573.00        4737.90          74.65
      2568        60.2149        3962.00        3667.13          62.94
      2569        60.2357        2878.00        2876.39          53.65
      2570        60.2564        2484.00        2510.98          49.84
      2571        60.2772        2640.00        2536.97          51.38
      2572        60.2980        2983.00        2853.22          54.62
      2573        60.3187        3700.00        3241.27          60.83
      2574        60.3395        3925.00        3315.04          62.65
      2575        60.3602        3299.00        2883.69          57.44
      2576        60.3810        2326.00        2299.69          48.23
      2577        60.4018        1766.00        1854.96          42.02
      2578        60.4225        1508.00        1591.32          38.83
      2579        60.4433        1354.00        1463.43          36.80
      2580        60.4640        1267.00        1392.96          35.59
      2581        60.4848        1148.00        1314.54          33.88
      2582        60.5056        1173.00        1241.71          34.25
      2583        60.5263        1208.00        1190.66          34.76
      2584        60.5471        1126.00        1158.33          33.56
      2585        60.5678        1121.00        1139.89          33.48
      2586        60.5886        1078.00        1132.91          32.83
      2587        60.6094        1066.00        1135.35          32.65
      2588        60.6301        1055.00        1133.77          32.48
      2589        60.6509        1079.00        1113.12          32.85
      2590        60.6716        1055.00        1088.22          32.48
      2591        60.6924        1071.00        1069.97          32.73
      2592        60.7132        1077.00        1057.76          32.82
      2593        60.7339        1114.00        1049.59          33.38
      2594        60.7547        1063.00        1043.30          32.60
      2595        60.7754        1074.00        1038.37          32.77
      2596        60.7962        1098.00        1034.37          33.14
      2597        60.8170        1078.00        1031.08          32.83
      2598        60.8377        1105.00        1028.37          33.24
      2599        60.8585        1066.00        1026.25          32.65
      2600        60.8792        1041.00        1024.49          32.26
      2601        60.9000        1015.00        1023.15          31.86
      2602        60.9207        1027.00        1022.14          32.05
      2603        60.9415        1039.00        1021.71          32.23
      2604        60.9623        1039.00        1022.09          32.23
      2605        60.9830        1011.00        1022.90          31.80
      2606        61.0038        1073.00        1024.70          32.76
      2607        61.0246        1013.00        1028.02          31.83
      2608        61.0453        1054.00        1034.29          32.47
      2609        61.0661        1062.00        1046.03          32.59
      2610        61.0868        1088.00        1067.91          32.98
      2611        61.1076        1083.00        1103.06          32.91
      2612        61.1284        1074.00        1136.81          32.77
      2613        61.1491        1101.00        1137.67          33.18
      2614        61.1699        1111.00        1109.39          33.33
      2615        61.1906        1102.00        1083.88          33.20
      2616        61.2114         992.00        1070.52          31.50
      2617        61.2322        1072.00        1070.04          32.74
      2618        61.2529        1090.00        1082.99          33.02
      2619        61.2737        1124.00        1111.31          33.53
      2620        61.2944        1181.00        1153.88          34.37
      2621        61.3152        1201.00        1204.56          34.66
      2622        61.3360        1254.00        1266.85          35.41
      2623        61.3567        1372.00        1339.00          37.04
      2624        61.3775        1332.00        1369.03          36.50
      2625        61.3982        1302.00        1338.99          36.08
      2626        61.4190        1257.00        1300.03          35.45
      2627        61.4398        1276.00        1303.12          35.72
      2628        61.4605        1413.00        1381.39          37.59
      2629        61.4813        1603.00        1553.55          40.04
      2630        61.5020        1820.00        1771.55          42.66
      2631        61.5228        1874.00        1873.21          43.29
      2632        61.5436        1777.00        1815.12          42.15
      2633        61.5643        1694.00        1734.53          41.16
      2634        61.5851        1725.00        1722.89          41.53
      2635        61.6058        1771.00        1770.15          42.08
      2636        61.6266        1862.00        1812.03          43.15
      2637        61.6474        1915.00        1816.66          43.76
      2638        61.6681        1920.00        1774.64          43.82
      2639        61.6889        1719.00        1678.60          41.46
      2640        61.7096        1473.00        1540.81          38.38
      2641        61.7304        1350.00        1434.49          36.74
      2642        61.7512        1330.00        1393.93          36.47
      2643        61.7719        1370.00        1396.88          37.01
      2644        61.7927        1388.00        1401.35          37.26
      2645        61.8134        1391.00        1376.50          37.30
      2646        61.8342        1381.00        1324.36          37.16
      2647        61.8549        1292.00        1277.14          35.94
      2648        61.8757        1223.00        1270.81          34.97
      2649        61.8965        1284.00        1314.93          35.83
      2650        61.9172        1308.00        1403.80          36.17
      2651        61.9380        1366.00        1454.45          36.96
      2652        61.9588        1223.00        1378.30          34.97
      2653        61.9795        1239.00        1261.89          35.20
      2654        62.0003        1157.00        1187.14          34.01
      2655        62.0210        1119.00        1153.69          33.45
      2656        62.0418        1162.00        1150.59          34.09
      2657        62.0625        1188.00        1174.97          34.47
      2658        62.0833        1228.00        1223.69          35.04
      2659        62.1041        1156.00        1264.96          34.00
      2660        62.1248        1204.00        1248.85          34.70
      2661        62.1456        1153.00        1202.66          33.96
      2662        62.1664        1160.00        1185.88          34.06
      2663        62.1871        1165.00        1197.77          34.13
      2664        62.2079        1209.00        1252.17          34.77
      2665        62.2286        1301.00        1368.39          36.07
      2666        62.2494        1399.00        1566.98          37.40
      2667        62.2702        1682.00        1811.24          41.01
      2668        62.2909        1767.00        1907.62          42.04
      2669        62.3117        1699.00        1759.27          41.22
      2670        62.3324        1354.00        1543.33          36.80
      2671        62.3532        1320.00        1384.77          36.33
      2672        62.3740        1216.00        1305.40          34.87
      2673        62.3947        1235.00        1298.48          35.14
      2674        62.4155        1333.00        1356.89          36.51
      2675        62.4362        1299.00        1462.71          36.04
      2676        62.4570        1471.00        1535.37          38.35
      2677        62.4778        1441.00        1490.01          37.96
      2678        62.4985        1317.00        1389.50          36.29
      2679        62.5193        1236.00        1312.51          35.16
      2680        62.5400        1188.00        1280.03          34.47
      2681        62.5608        1245.00        1286.04          35.28
      2682        62.5816        1266.00        1312.07          35.58
      2683        62.6023        1269.00        1340.06          35.62
      2684        62.6231        1344.00        1380.58          36.66
      2685        62.6438        1400.00        1468.71          37.42
      2686        62.6646        1711.00        1648.99          41.36
      2687        62.6854        2009.00        1976.21          44.82
      2688        62.7061        2477.00        2461.10          49.77
      2689        62.7269        2586.00        2796.68          50.85
      2690        62.7476        2300.00        2557.93          47.96
      2691        62.7684        1996.00        2136.43          44.68
      2692        62.7892        1903.00        1860.92          43.62
      2693        62.8099        1758.00        1750.00          41.93
      2694        62.8307        1768.00        1781.33          42.05
      2695        62.8514        2000.00        1960.96          44.72
      2696        62.8722        2420.00        2323.10          49.19
      2697        62.8930        2838.00        2832.84          53.27
      2698        62.9137        3105.00        3283.73          55.72
      2699        62.9345        3685.00        3667.56          60.70
      2700        62.9552        4152.00        3889.03          64.44
      2701        62.9760        4092.00        3863.33          63.97
      2702        62.9967        4015.00        3980.65          63.36
      2703        63.0175        4388.00        4546.44          66.24
      2704        63.0383        5265.00        5302.76          72.56
      2705        63.0590        5499.00        5292.26          74.16
      2706        63.0798        4725.00        4553.05          68.74
      2707        63.1006        3769.00        3887.37          61.39
      2708        63.1213        3329.00        3453.16          57.70
      2709        63.1421        3000.00        3101.13          54.77
      2710        63.1628        2852.00        2883.60          53.40
      2711        63.1836        2952.00        2939.18          54.33
      2712        63.2044        3298.00        3226.32          57.43
      2713        63.2251        3395.00        3338.55          58.27
      2714        63.2459        3150.00        2971.38          56.12
      2715        63.2666        2394.00        2483.01          48.93
      2716        63.2874        2007.00        2121.06          44.80
      2717        63.3082        1796.00        1923.19          42.38
      2718        63.3289        1753.00        1866.89          41.87
      2719        63.3497        1748.00        1902.75          41.81
      2720        63.3704        1838.00        2037.34          42.87
      2721        63.3912        2139.00        2374.13          46.25
      2722        63.4120        2795.00        3021.57          52.87
      2723        63.4327        3819.00        4005.48          61.80
      2724        63.4535        5045.00        5085.35          71.03
      2725        63.4742        5129.00        5532.57          71.62
      2726        63.4950        4131.00        4912.19          64.27
      2727        63.5158        3216.00        3863.76          56.71
      2728        63.5365        2559.00        2992.74          50.59
      2729        63.5573        2280.00        2494.66          47.75
      2730        63.5780        2315.00        2381.45          48.11
      2731        63.5988        2556.00        2599.61          50.56
      2732        63.6196        3095.00        3021.68          55.63
      2733        63.6403        3217.00        3360.70          56.72
      2734        63.6611        2823.00        3223.92          53.13
      2735        63.6818        2476.00        2696.09          49.76
      2736        63.7026        1960.00        2148.80          44.27
      2737        63.7234        1706.00        1745.54          41.30
      2738        63.7441        1593.00        1493.68          39.91
      2739        63.7649        1350.00        1349.00          36.74
      2740        63.7856        1333.00        1265.58          36.51
      2741        63.8064        1310.00        1213.36          36.19
      2742        63.8272        1268.00        1177.55          35.61
      2743        63.8479        1165.00        1151.33          34.13
      2744        63.8687        1184.00        1131.31          34.41
      2745        63.8894        1132.00        1116.22          33.65
      2746        63.9102        1186.00        1105.43          34.44
      2747        63.9310        1097.00        1097.03          33.12
      2748        63.9517        1095.00        1091.19          33.09
      2749        63.9725        1099.00        1088.56          33.15
      2750        63.9932        1057.00        1087.69          32.51
      2751        64.0140        1129.00        1089.77          33.60
      2752        64.0347        1074.00        1095.18          32.77
      2753        64.0555        1136.00        1107.07          33.70
      2754        64.0763        1088.00        1128.19          32.98
      2755        64.0970        1146.00        1162.94          33.85
      2756        64.1178        1292.00        1219.59          35.94
      2757        64.1385        1310.00        1304.00          36.19
      2758        64.1593        1328.00        1419.06          36.44
      2759        64.1801        1602.00        1579.49          40.03
      2760        64.2008        1744.00        1759.96          41.76
      2761        64.2216        1891.00        1835.37          43.49
      2762        64.2423        1664.00        1738.58          40.79
      2763        64.2631        1465.00        1564.94          38.28
      2764        64.2839        1398.00        1419.59          37.39
      2765        64.3046        1224.00        1338.04          34.99
      2766        64.3254        1293.00        1315.81          35.96
      2767        64.3461        1386.00        1343.82          37.23
      2768        64.3669        1430.00        1409.23          37.82
      2769        64.3877        1500.00        1471.97          38.73
      2770        64.4084        1548.00        1464.00          39.34
      2771        64.4292        1468.00        1387.12          38.31
      2772        64.4500        1358.00        1301.95          36.85
      2773        64.4707        1268.00        1235.38          35.61
      2774        64.4915        1216.00        1197.82          34.87
      2775        64.5122        1245.00        1183.22          35.28
      2776        64.5330        1357.00        1186.10          36.84
      2777        64.5537        1286.00        1200.74          35.86
      2778        64.5745        1289.00        1227.28          35.90
      2779        64.5953        1405.00        1268.21          37.48
      2780        64.6160        1472.00        1330.31          38.37
      2781        64.6368        1537.00        1427.98          39.20
      2782        64.6575        1646.00        1590.60          40.57
      2783        64.6783        1920.00        1875.03          43.82
      2784        64.6991        2248.00        2364.29          47.41
      2785        64.7198        3213.00        3143.63          56.68
      2786        64.7406        4216.00        4199.90          64.93
      2787        64.7613        5345.00        5171.43          73.11
      2788        64.7821        5126.00        5251.32          71.60
      2789        64.8029        3979.00        4358.35          63.08
      2790        64.8236        3027.00        3337.79          55.02
      2791        64.8444        2423.00        2639.42          49.22
      2792        64.8652        2175.00        2310.79          46.64
      2793        64.8859        2241.00        2307.09          47.34
      2794        64.9067        2620.00        2575.51          51.19
      2795        64.9274        2957.00        3013.25          54.38
      2796        64.9482        3347.00        3327.97          57.85
      2797        64.9689        3035.00        3138.79          55.09
      2798        64.9897        2470.00        2600.44          49.70
      2799        65.0105        1993.00        2101.83          44.64
      2800        65.0312        1746.00        1774.12          41.79
      2801        65.0520        1670.00        1608.72          40.87
      2802        65.0727        1654.00        1576.19          40.67
      2803        65.0935        1823.00        1644.17          42.70
      2804        65.1143        1943.00        1726.32          44.08
      2805        65.1350        1822.00        1691.72          42.68
      2806        65.1558        1590.00        1544.51          39.87
      2807        65.1765        1406.00        1400.08          37.50
      2808        65.1973        1336.00        1309.82          36.55
      2809        65.2181        1316.00        1271.42          36.28
      2810        65.2388        1327.00        1277.18          36.43
      2811        65.2596        1404.00        1323.69          37.47
      2812        65.2803        1413.00        1398.12          37.59
      2813        65.3011        1565.00        1446.63          39.56
      2814        65.3219        1462.00        1417.13          38.24
      2815        65.3426        1352.00        1344.31          36.77
      2816        65.3634        1377.00        1288.60          37.11
      2817        65.3841        1263.00        1268.33          35.54
      2818        65.4049        1262.00        1282.68          35.52
      2819        65.4257        1324.00        1333.56          36.39
      2820        65.4464        1388.00        1433.72          37.26
      2821        65.4672        1519.00        1610.24          38.97
      2822        65.4879        2011.00        1902.07          44.84
      2823        65.5087        2490.00        2340.66          49.90
      2824        65.5295        3005.00        2841.90          54.82
      2825        65.5502        3069.00        3036.57          55.40
      2826        65.5710        2596.00        2732.48          50.95
      2827        65.5918        2153.00        2312.42          46.40
      2828        65.6125        2005.00        2019.42          44.78
      2829        65.6333        1994.00        1886.35          44.65
      2830        65.6540        1951.00        1930.35          44.17
      2831        65.6748        2322.00        2168.15          48.19
      2832        65.6955        2869.00        2607.70          53.56
      2833        65.7163        3481.00        3167.03          59.00
      2834        65.7371        4000.00        3553.32          63.25
      2835        65.7578        4040.00        3529.14          63.56
      2836        65.7786        3538.00        3174.31          59.48
      2837        65.7993        2806.00        2752.65          52.97
      2838        65.8201        2710.00        2502.81          52.06
      2839        65.8409        2567.00        2476.41          50.67
      2840        65.8616        2863.00        2575.08          53.51
      2841        65.8824        2918.00        2639.04          54.02
      2842        65.9031        2873.00        2590.21          53.60
      2843        65.9239        2724.00        2485.65          52.19
      2844        65.9447        2566.00        2320.09          50.66
      2845        65.9654        2237.00        2080.37          47.30
      2846        65.9862        1901.00        1854.06          43.60
      2847        66.0070        1728.00        1725.98          41.57
      2848        66.0277        1764.00        1693.88          42.00
      2849        66.0485        1708.00        1694.48          41.33
      2850        66.0692        1754.00        1646.93          41.88
      2851        66.0900        1566.00        1528.66          39.57
      2852        66.1107        1463.00        1397.24          38.25
      2853        66.1315        1249.00        1296.33          35.34
      2854        66.1523        1179.00        1229.73          34.34
      2855        66.1730        1154.00        1192.46          33.97
      2856        66.1938        1163.00        1185.94          34.10
      2857        66.2145        1158.00        1212.20          34.03
      2858        66.2353        1263.00        1271.28          35.54
      2859        66.2561        1429.00        1345.11          37.80
      2860        66.2768        1316.00        1372.40          36.28
      2861        66.2976        1298.00        1314.90          36.03
      2862        66.3183        1170.00        1229.89          34.21
      2863        66.3391        1171.00        1160.32          34.22
      2864        66.3599        1116.00        1117.39          33.41
      2865        66.3806        1051.00        1099.84          32.42
      2866        66.4014        1107.00        1105.38          33.27
      2867        66.4221        1125.00        1130.74          33.54
      2868        66.4429        1180.00        1162.83          34.35
      2869        66.4637        1188.00        1170.54          34.47
      2870        66.4844        1143.00        1137.83          33.81
      2871        66.5052        1104.00        1092.56          33.23
      2872        66.5259        1068.00        1056.22          32.68
      2873        66.5467        1102.00        1032.89          33.20
      2874        66.5675        1048.00        1019.35          32.37
      2875        66.5882        1103.00        1011.63          33.21
      2876        66.6090        1061.00        1007.14          32.57
      2877        66.6297        1115.00        1005.02          33.39
      2878        66.6505        1011.00        1004.59          31.80
      2879        66.6713        1001.00        1005.81          31.64
      2880        66.6920        1050.00        1009.10          32.40
      2881        66.7128        1040.00        1015.21          32.25
      2882        66.7336        1005.00        1025.86          31.70
      2883        66.7543        1061.00        1040.93          32.57
      2884        66.7751        1180.00        1056.72          34.35
      2885        66.7958        1112.00        1064.18          33.35
      2886        66.8166        1105.00        1061.40          33.24
      2887        66.8373        1121.00        1055.43          33.48
      2888        66.8581        1083.00        1052.79          32.91
      2889        66.8789        1066.00        1056.31          32.65
      2890        66.8996        1055.00        1066.02          32.48
      2891        66.9204        1123.00        1082.64          33.51
      2892        66.9411        1113.00        1106.56          33.36
      2893        66.9619        1165.00        1137.12          34.13
      2894        66.9827        1256.00        1172.74          35.44
      2895        67.0034        1208.00        1217.68          34.76
      2896        67.0242        1273.00        1286.92          35.68
      2897        67.0449        1357.00        1406.33          36.84
      2898        67.0657        1580.00        1618.38          39.75
      2899        67.0865        1928.00        1979.75          43.91
      2900        67.1072        2403.00        2530.63          49.02
      2901        67.1280        3188.00        3185.55          56.46
      2902        67.1488        3683.00        3562.34          60.69
      2903        67.1695        3387.00        3392.43          58.20
      2904        67.1903        2744.00        2902.40          52.38
      2905        67.2110        2110.00        2407.32          45.93
      2906        67.2318        1830.00        2054.80          42.78
      2907        67.2525        1744.00        1874.69          41.76
      2908        67.2733        1814.00        1864.19          42.59
      2909        67.2941        2082.00        2014.10          45.63
      2910        67.3148        2281.00        2266.63          47.76
      2911        67.3356        2552.00        2428.64          50.52
      2912        67.3563        2511.00        2340.66          50.11
      2913        67.3771        2151.00        2093.12          46.38
      2914        67.3979        1705.00        1841.47          41.29
      2915        67.4186        1633.00        1664.79          40.41
      2916        67.4394        1561.00        1584.70          39.51
      2917        67.4601        1548.00        1611.28          39.34
      2918        67.4809        1681.00        1761.48          41.00
      2919        67.5017        1963.00        2046.65          44.31
      2920        67.5224        2467.00        2418.95          49.67
      2921        67.5432        2800.00        2676.52          52.92
      2922        67.5639        2438.00        2612.88          49.38
      2923        67.5847        2090.00        2324.14          45.72
      2924        67.6055        1804.00        2052.80          42.47
      2925        67.6262        1739.00        1911.61          41.70
      2926        67.6470        1629.00        1866.63          40.36
      2927        67.6677        1591.00        1823.30          39.89
      2928        67.6885        1617.00        1812.12          40.21
      2929        67.7093        1826.00        1878.08          42.73
      2930        67.7300        1868.00        1942.39          43.22
      2931        67.7508        1775.00        1884.03          42.13
      2932        67.7715        1570.00        1714.86          39.62
      2933        67.7923        1407.00        1545.47          37.51
      2934        67.8131        1399.00        1436.55          37.40
      2935        67.8338        1292.00        1375.06          35.94
      2936        67.8546        1289.00        1304.12          35.90
      2937        67.8754        1117.00        1218.41          33.42
      2938        67.8961        1109.00        1148.52          33.30
      2939        67.9169        1057.00        1100.00          32.51
      2940        67.9376        1105.00        1068.11          33.24
      2941        67.9584        1062.00        1048.39          32.59
      2942        67.9791        1004.00        1037.35          31.69
      2943        67.9999        1062.00        1032.65          32.59
      2944        68.0207        1034.00        1032.76          32.16
      2945        68.0414        1049.00        1034.99          32.39
      2946        68.0622        1029.00        1035.15          32.08
      2947        68.0829        1058.00        1030.48          32.53
      2948        68.1037        1088.00        1025.32          32.98
      2949        68.1245        1003.00        1023.48          31.67
      2950        68.1452        1077.00        1025.48          32.82
      2951        68.1660        1068.00        1032.34          32.68
      2952        68.1867        1129.00        1044.82          33.60
      2953        68.2075        1192.00        1064.77          34.53
      2954        68.2283        1203.00        1095.11          34.68
      2955        68.2490        1157.00        1139.96          34.01
      2956        68.2698        1302.00        1206.91          36.08
      2957        68.2906        1407.00        1309.09          37.51
      2958        68.3113        1575.00        1449.00          39.69
      2959        68.3321        1664.00        1560.04          40.79
      2960        68.3528        1784.00        1529.95          42.24
      2961        68.3736        1667.00        1430.94          40.83
      2962        68.3943        1593.00        1379.09          39.91
      2963        68.4151        1413.00        1403.09          37.59
      2964        68.4359        1530.00        1507.94          39.12
      2965        68.4566        1739.00        1695.23          41.70
      2966        68.4774        2040.00        1940.46          45.17
      2967        68.4981        2353.00        2147.45          48.51
      2968        68.5189        2410.00        2163.73          49.09
      2969        68.5397        2171.00        1977.10          46.59
      2970        68.5604        1847.00        1739.26          42.98
      2971        68.5812        1554.00        1572.07          39.42
      2972        68.6019        1489.00        1486.26          38.59
      2973        68.6227        1377.00        1453.95          37.11
      2974        68.6435        1443.00        1459.24          37.99
      2975        68.6642        1466.00        1497.14          38.29
      2976        68.6850        1548.00        1538.40          39.34
      2977        68.7057        1589.00        1515.16          39.86
      2978        68.7265        1502.00        1412.72          38.76
      2979        68.7473        1321.00        1298.61          36.35
      2980        68.7680        1172.00        1215.70          34.23
      2981        68.7888        1165.00        1163.54          34.13
      2982        68.8095        1123.00        1127.32          33.51
      2983        68.8303        1109.00        1096.11          33.30
      2984        68.8511        1101.00        1069.42          33.18
      2985        68.8718        1087.00        1051.01          32.97
      2986        68.8926        1010.00        1041.21          31.78
      2987        68.9133        1071.00        1033.55          32.73
      2988        68.9341        1064.00        1019.59          32.62
      2989        68.9549        1055.00        1002.16          32.48
      2990        68.9756        1008.00         987.16          31.75
      2991        68.9964         980.00         976.74          31.31
      2992        69.0172         994.00         970.77          31.53
      2993        69.0379        1014.00         968.27          31.84
      2994        69.0587        1026.00         968.79          32.03
      2995        69.0794        1031.00         972.13          32.11
      2996        69.1002        1098.00         975.45          33.14
      2997        69.1209         988.00         975.05          31.43
      2998        69.1417        1017.00         970.06          31.89
      2999        69.1625        1026.00         965.08          32.03
      3000        69.1832         962.00         962.18          31.02
      3001        69.2040         942.00         961.02          30.69
      3002        69.2247        1008.00         962.48          31.75
      3003        69.2455        1001.00         966.15          31.64
      3004        69.2663        1014.00         974.16          31.84
      3005        69.2870        1043.00         984.94          32.30
      3006        69.3078         960.00        1003.20          30.98
      3007        69.3285        1047.00        1033.66          32.36
      3008        69.3493        1055.00        1083.60          32.48
      3009        69.3701        1188.00        1158.98          34.47
      3010        69.3908        1221.00        1252.33          34.94
      3011        69.4116        1293.00        1314.50          35.96
      3012        69.4324        1277.00        1284.53          35.74
      3013        69.4531        1177.00        1204.98          34.31
      3014        69.4739        1101.00        1141.08          33.18
      3015        69.4946        1122.00        1106.41          33.50
      3016        69.5154        1089.00        1090.31          33.00
      3017        69.5361        1076.00        1085.81          32.80
      3018        69.5569        1150.00        1099.35          33.91
      3019        69.5777        1215.00        1135.61          34.86
      3020        69.5984        1168.00        1181.19          34.18
      3021        69.6192        1143.00        1204.54          33.81
      3022        69.6399        1158.00        1201.53          34.03
      3023        69.6607        1104.00        1208.51          33.23
      3024        69.6815        1130.00        1234.21          33.62
      3025        69.7022        1186.00        1256.58          34.44
      3026        69.7230        1121.00        1249.47          33.48
      3027        69.7437        1091.00        1210.70          33.03
      3028        69.7645        1101.00        1157.24          33.18
      3029        69.7853        1015.00        1108.43          31.86
      3030        69.8060        1050.00        1075.98          32.40
      3031        69.8268        1108.00        1064.48          33.29
      3032        69.8475        1012.00        1073.64          31.81
      3033        69.8683        1061.00        1106.33          32.57
      3034        69.8891        1076.00        1146.40          32.80
      3035        69.9098        1210.00        1188.81          34.79
      3036        69.9306        1276.00        1227.13          35.72
      3037        69.9513        1265.00        1255.83          35.57
      3038        69.9721        1302.00        1264.34          36.08
      3039        69.9929        1309.00        1241.19          36.18
      3040        70.0136        1254.00        1190.72          35.41
      3041        70.0344        1107.00        1133.58          33.27
      3042        70.0551        1068.00        1088.20          32.68
      3043        70.0759        1037.00        1061.56          32.20
      3044        70.0967        1104.00        1053.97          33.23
      3045        70.1174        1083.00        1063.29          32.91
      3046        70.1382        1078.00        1086.30          32.83
      3047        70.1590        1082.00        1114.09          32.89
      3048        70.1797        1137.00        1138.92          33.72
      3049        70.2005        1148.00        1157.56          33.88
      3050        70.2212        1101.00        1178.14          33.18
      3051        70.2420        1111.00        1203.35          33.33
      3052        70.2627        1196.00        1205.87          34.58
      3053        70.2835        1052.00        1167.24          32.43
      3054        70.3043        1058.00        1116.03          32.53
      3055        70.3250        1029.00        1079.06          32.08
      3056        70.3458        1005.00        1060.58          31.70
      3057        70.3665        1041.00        1057.73          32.26
      3058        70.3873        1050.00        1068.13          32.40
      3059        70.4081        1085.00        1091.96          32.94
      3060        70.4288        1039.00        1129.88          32.23
      3061        70.4496        1087.00        1176.05          32.97
      3062        70.4703        1130.00        1218.69          33.62
      3063        70.4911        1224.00        1269.99          34.99
      3064        70.5119        1341.00        1367.60          36.62
      3065        70.5326        1473.00        1548.53          38.38
      3066        70.5534        1875.00        1835.83          43.30
      3067        70.5742        2318.00        2192.22          48.15
      3068        70.5949        2456.00        2413.86          49.56
      3069        70.6157        2188.00        2313.68          46.78
      3070        70.6364        1889.00        2018.74          43.46
      3071        70.6572        1524.00        1725.11          39.04
      3072        70.6779        1410.00        1515.17          37.55
      3073        70.6987        1329.00        1400.49          36.46
      3074        70.7195        1366.00        1375.19          36.96
      3075        70.7402        1460.00        1432.20          38.21
      3076        70.7610        1611.00        1562.01          40.14
      3077        70.7817        1787.00        1716.03          42.27
      3078        70.8025        1863.00        1771.71          43.16
      3079        70.8233        1624.00        1679.80          40.30
      3080        70.8440        1516.00        1528.91          38.94
      3081        70.8648        1416.00        1399.69          37.63
      3082        70.8855        1343.00        1318.44          36.65
      3083        70.9063        1319.00        1287.02          36.32
      3084        70.9271        1343.00        1302.85          36.65
      3085        70.9478        1358.00        1366.35          36.85
      3086        70.9686        1535.00        1479.32          39.18
      3087        70.9893        1607.00        1637.67          40.09
      3088        71.0101        1767.00        1809.37          42.04
      3089        71.0309        1814.00        1932.76          42.59
      3090        71.0516        1976.00        1943.20          44.45
      3091        71.0724        1919.00        1866.12          43.81
      3092        71.0931        1779.00        1807.28          42.18
      3093        71.1139        1798.00        1837.60          42.40
      3094        71.1347        1982.00        2002.10          44.52
      3095        71.1554        2279.00        2338.97          47.74
      3096        71.1762        2833.00        2861.80          53.23
      3097        71.1969        3756.00        3480.21          61.29
      3098        71.2177        4558.00        3903.37          67.51
      3099        71.2385        4625.00        3887.83          68.01
      3100        71.2592        3769.00        3564.63          61.39
      3101        71.2800        3133.00        3195.59          55.97
      3102        71.3008        2787.00        2886.03          52.79
      3103        71.3215        2483.00        2616.82          49.83
      3104        71.3423        2292.00        2411.04          47.87
      3105        71.3630        2193.00        2318.29          46.83
      3106        71.3838        2264.00        2360.29          47.58
      3107        71.4045        2558.00        2479.03          50.58
      3108        71.4253        2870.00        2522.32          53.57
      3109        71.4461        2726.00        2408.82          52.21
      3110        71.4668        2283.00        2231.68          47.78
      3111        71.4876        2038.00        2093.28          45.14
      3112        71.5083        1909.00        2009.40          43.69
      3113        71.5291        1860.00        1965.16          43.13
      3114        71.5499        1922.00        1964.78          43.84
      3115        71.5706        1907.00        1977.84          43.67
      3116        71.5914        1671.00        1909.78          40.88
      3117        71.6121        1533.00        1744.47          39.15
      3118        71.6329        1357.00        1575.90          36.84
      3119        71.6537        1326.00        1463.66          36.41
      3120        71.6744        1334.00        1418.28          36.52
      3121        71.6952        1283.00        1418.35          35.82
      3122        71.7160        1338.00        1414.32          36.58
      3123        71.7367        1346.00        1395.96          36.69
      3124        71.7575        1306.00        1397.51          36.14
      3125        71.7782        1398.00        1408.68          37.39
      3126        71.7990        1357.00        1377.07          36.84
      3127        71.8197        1214.00        1300.04          34.84
      3128        71.8405        1146.00        1222.79          33.85
      3129        71.8613        1135.00        1170.37          33.69
      3130        71.8820        1120.00        1145.41          33.47
      3131        71.9028        1126.00        1134.69          33.56
      3132        71.9235        1087.00        1111.66          32.97
      3133        71.9443        1034.00        1073.11          32.16
      3134        71.9651        1055.00        1037.27          32.48
      3135        71.9858        1015.00        1011.07          31.86
      3136        72.0066        1042.00         993.34          32.28
      3137        72.0274        1042.00         981.24          32.28
      3138        72.0481         990.00         972.98          31.46
      3139        72.0689         991.00         967.44          31.48
      3140        72.0896        1002.00         963.72          31.65
      3141        72.1104         960.00         961.26          30.98
      3142        72.1311         966.00         961.17          31.08
      3143        72.1519         963.00         963.00          31.03
      3144        72.1727        1031.00         966.70          32.11
      3145        72.1934         988.00         971.51          31.43
      3146        72.2142         991.00         975.51          31.48
      3147        72.2349         944.00         977.53          30.72
      3148        72.2557         982.00         977.48          31.34
      3149        72.2765         985.00         980.34          31.38
      3150        72.2972         943.00         988.52          30.71
      3151        72.3180        1040.00        1006.60          32.25
      3152        72.3387        1098.00        1038.67          33.14
      3153        72.3595        1042.00        1086.70          32.28
      3154        72.3803        1170.00        1147.89          34.21
      3155        72.4010        1225.00        1207.60          35.00
      3156        72.4218        1243.00        1237.28          35.26
      3157        72.4426        1179.00        1219.22          34.34
      3158        72.4633        1122.00        1170.10          33.50
      3159        72.4841        1084.00        1122.22          32.92
      3160        72.5048        1067.00        1088.98          32.67
      3161        72.5256        1062.00        1078.76          32.59
      3162        72.5463        1083.00        1096.97          32.91
      3163        72.5671        1159.00        1147.17          34.04
      3164        72.5879        1328.00        1229.34          36.44
      3165        72.6086        1385.00        1332.61          37.22
      3166        72.6294        1607.00        1419.17          40.09
      3167        72.6501        1524.00        1432.93          39.04
      3168        72.6709        1422.00        1364.96          37.71
      3169        72.6917        1274.00        1263.47          35.69
      3170        72.7124        1157.00        1170.56          34.01
      3171        72.7332        1061.00        1103.23          32.57
      3172        72.7539        1041.00        1064.23          32.26
      3173        72.7747        1012.00        1051.63          31.81
      3174        72.7955        1099.00        1061.23          33.15
      3175        72.8162        1070.00        1088.22          32.71
      3176        72.8370        1203.00        1118.57          34.68
      3177        72.8577        1185.00        1127.57          34.42
      3178        72.8785        1166.00        1105.03          34.15
      3179        72.8993        1028.00        1066.32          32.06
      3180        72.9200        1018.00        1028.46          31.91
      3181        72.9408        1033.00         998.48          32.14
      3182        72.9615         977.00         977.65          31.26
      3183        72.9823        1032.00         964.71          32.12
      3184        73.0031        1001.00         956.88          31.64
      3185        73.0238         944.00         952.33          30.72
      3186        73.0446         933.00         950.11          30.55
      3187        73.0653        1018.00         948.94          31.91
      3188        73.0861         934.00         949.26          30.56
      3189        73.1069         948.00         950.75          30.79
      3190        73.1276         911.00         953.71          30.18
      3191        73.1484         962.00         958.74          31.02
      3192        73.1692         967.00         967.04          31.10
      3193        73.1899         922.00         979.54          30.36
      3194        73.2107         986.00         997.89          31.40
      3195        73.2314        1065.00        1020.41          32.63
      3196        73.2522        1100.00        1040.92          33.17
      3197        73.2729        1124.00        1049.92          33.53
      3198        73.2937        1037.00        1045.61          32.20
      3199        73.3145        1013.00        1037.59          31.83
      3200        73.3352        1026.00        1034.71          32.03
      3201        73.3560        1044.00        1043.87          32.31
      3202        73.3767        1008.00        1069.65          31.75
      3203        73.3975        1125.00        1113.46          33.54
      3204        73.4183        1119.00        1158.18          33.45
      3205        73.4390        1128.00        1171.17          33.59
      3206        73.4598        1145.00        1153.44          33.84
      3207        73.4805        1091.00        1134.66          33.03
      3208        73.5013        1150.00        1124.76          33.91
      3209        73.5221        1148.00        1123.84          33.88
      3210        73.5428        1169.00        1130.98          34.19
      3211        73.5636        1223.00        1148.14          34.97
      3212        73.5844        1226.00        1183.63          35.01
      3213        73.6051        1205.00        1246.46          34.71
      3214        73.6259        1289.00        1336.14          35.90
      3215        73.6466        1414.00        1434.99          37.60
      3216        73.6674        1566.00        1525.60          39.57
      3217        73.6881        1498.00        1594.02          38.70
      3218        73.7089        1649.00        1622.46          40.61
      3219        73.7297        1581.00        1624.22          39.76
      3220        73.7504        1679.00        1648.86          40.98
      3221        73.7712        1615.00        1748.20          40.19
      3222        73.7919        1848.00        1971.17          42.99
      3223        73.8127        2276.00        2368.59          47.71
      3224        73.8335        2987.00        2975.75          54.65
      3225        73.8542        4011.00        3716.68          63.33
      3226        73.8750        4307.00        4204.36          65.63
      3227        73.8957        3888.00        4026.06          62.35
      3228        73.9165        3065.00        3415.98          55.36
      3229        73.9373        2565.00        2791.88          50.65
      3230        73.9580        2116.00        2315.92          46.00
      3231        73.9788        1742.00        2012.06          41.74
      3232        73.9995        1718.00        1872.19          41.45
      3233        74.0203        1799.00        1886.65          42.41
      3234        74.0411        2119.00        2048.00          46.03
      3235        74.0618        2349.00        2323.51          48.47
      3236        74.0826        2660.00        2562.41          51.58
      3237        74.1033        2558.00        2523.73          50.58
      3238        74.1241        2152.00        2227.85          46.39
      3239        74.1449        1842.00        1893.06          42.92
      3240        74.1656        1526.00        1625.82          39.06
      3241        74.1864        1367.00        1437.52          36.97
      3242        74.2071        1300.00        1314.54          36.06
      3243        74.2279        1209.00        1236.19          34.77
      3244        74.2487        1214.00        1177.78          34.84
      3245        74.2694        1194.00        1128.58          34.55
      3246        74.2902        1136.00        1091.09          33.70
      3247        74.3110        1125.00        1064.61          33.54
      3248        74.3317        1077.00        1046.48          32.82
      3249        74.3525        1092.00        1034.67          33.05
      3250        74.3732        1067.00        1028.09          32.67
      3251        74.3940        1087.00        1026.42          32.97
      3252        74.4147        1077.00        1029.83          32.82
      3253        74.4355        1096.00        1037.87          33.11
      3254        74.4563        1059.00        1047.87          32.54
      3255        74.4770        1062.00        1059.63          32.59
      3256        74.4978        1100.00        1081.51          33.17
      3257        74.5185        1079.00        1119.96          32.85
      3258        74.5393        1209.00        1176.14          34.77
      3259        74.5601        1285.00        1241.39          35.85
      3260        74.5808        1325.00        1290.17          36.40
      3261        74.6016        1281.00        1292.36          35.79
      3262        74.6223        1240.00        1251.03          35.21
      3263        74.6431        1149.00        1198.01          33.90
      3264        74.6639        1128.00        1158.43          33.59
      3265        74.6846        1215.00        1143.33          34.86
      3266        74.7054        1209.00        1157.68          34.77
      3267        74.7262        1249.00        1205.00          35.34
      3268        74.7469        1215.00        1286.10          34.86
      3269        74.7677        1382.00        1394.71          37.18
      3270        74.7884        1533.00        1498.41          39.15
      3271        74.8092        1608.00        1538.53          40.10
      3272        74.8299        1570.00        1497.20          39.62
      3273        74.8507        1493.00        1413.00          38.64
      3274        74.8715        1387.00        1322.32          37.24
      3275        74.8922        1291.00        1250.44          35.93
      3276        74.9130        1188.00        1210.05          34.47
      3277        74.9337        1207.00        1204.51          34.74
      3278        74.9545        1189.00        1233.98          34.48
      3279        74.9753        1233.00        1296.34          35.11
      3280        74.9960        1335.00        1380.90          36.54
      3281        75.0168        1436.00        1459.83          37.89
      3282        75.0375        1492.00        1497.41          38.63
      3283        75.0583        1636.00        1489.29          40.45
      3284        75.0791        1496.00        1456.80          38.68
      3285        75.0998        1395.00        1430.42          37.35
      3286        75.1206        1380.00        1435.79          37.15
      3287        75.1413        1467.00        1476.54          38.30
      3288        75.1621        1459.00        1535.98          38.20
      3289        75.1829        1576.00        1585.43          39.70
      3290        75.2036        1621.00        1616.10          40.26
      3291        75.2244        1630.00        1649.93          40.37
      3292        75.2451        1540.00        1695.94          39.24
      3293        75.2659        1670.00        1722.91          40.87
      3294        75.2867        1668.00        1696.11          40.84
      3295        75.3074        1623.00        1621.63          40.29
      3296        75.3282        1424.00        1530.40          37.74
      3297        75.3489        1365.00        1450.74          36.95
      3298        75.3697        1289.00        1395.31          35.90
      3299        75.3905        1348.00        1358.29          36.72
      3300        75.4112        1274.00        1327.80          35.69
      3301        75.4320        1228.00        1305.21          35.04
      3302        75.4528        1195.00        1300.19          34.57
      3303        75.4735        1254.00        1309.00          35.41
      3304        75.4943        1275.00        1314.75          35.71
      3305        75.5150        1220.00        1305.84          34.93
      3306        75.5358        1236.00        1281.63          35.16
      3307        75.5565        1212.00        1243.47          34.81
      3308        75.5773        1201.00        1193.69          34.66
      3309        75.5981        1119.00        1138.39          33.45
      3310        75.6188        1138.00        1086.58          33.73
      3311        75.6396        1033.00        1045.86          32.14
      3312        75.6603        1030.00        1017.97          32.09
      3313        75.6811         976.00        1001.43          31.24
      3314        75.7019         998.00         993.52          31.59
      3315        75.7226         968.00         993.53          31.11
      3316        75.7434        1061.00         998.69          32.57
      3317        75.7641         984.00        1004.52          31.37
      3318        75.7849        1033.00        1005.86          32.14
      3319        75.8057        1055.00        1000.07          32.48
      3320        75.8264         987.00         988.60          31.42
      3321        75.8472        1029.00         975.73          32.08
      3322        75.8680        1005.00         964.97          31.70
      3323        75.8887         998.00         957.12          31.59
      3324        75.9095        1005.00         952.02          31.70
      3325        75.9302        1044.00         949.01          32.31
      3326        75.9510        1001.00         947.38          31.64
      3327        75.9717        1003.00         946.99          31.67
      3328        75.9925        1007.00         947.29          31.73
      3329        76.0133         968.00         948.39          31.11
      3330        76.0340         940.00         950.05          30.66
      3331        76.0548         986.00         952.60          31.40
      3332        76.0755         999.00         956.03          31.61
      3333        76.0963         986.00         960.77          31.40
      3334        76.1171        1009.00         967.35          31.76
      3335        76.1378         964.00         976.92          31.05
      3336        76.1586        1068.00         991.36          32.68
      3337        76.1793        1118.00        1013.46          33.44
      3338        76.2001        1095.00        1047.62          33.09
      3339        76.2209        1085.00        1097.93          32.94
      3340        76.2416        1259.00        1167.38          35.48
      3341        76.2624        1329.00        1253.24          36.46
      3342        76.2831        1518.00        1337.46          38.96
      3343        76.3039        1422.00        1383.82          37.71
      3344        76.3247        1438.00        1379.85          37.92
      3345        76.3454        1356.00        1354.02          36.82
      3346        76.3662        1286.00        1327.97          35.86
      3347        76.3869        1263.00        1306.97          35.54
      3348        76.4077        1269.00        1299.57          35.62
      3349        76.4285        1231.00        1322.63          35.09
      3350        76.4492        1393.00        1388.94          37.32
      3351        76.4700        1487.00        1495.70          38.56
      3352        76.4907        1720.00        1610.24          41.47
      3353        76.5115        1650.00        1682.79          40.62
      3354        76.5323        1650.00        1706.82          40.62
      3355        76.5530        1672.00        1724.22          40.89
      3356        76.5738        1762.00        1740.99          41.98
      3357        76.5946        1828.00        1704.86          42.76
      3358        76.6153        1613.00        1605.41          40.16
      3359        76.6361        1498.00        1486.96          38.70
      3360        76.6568        1267.00        1389.92          35.59
      3361        76.6776        1237.00        1330.81          35.17
      3362        76.6983        1263.00        1306.64          35.54
      3363        76.7191        1244.00        1297.32          35.27
      3364        76.7399        1291.00        1282.66          35.93
      3365        76.7606        1228.00        1269.66          35.04
      3366        76.7814        1288.00        1274.00          35.89
      3367        76.8021        1382.00        1282.04          37.18
      3368        76.8229        1343.00        1263.46          36.65
      3369        76.8437        1244.00        1216.62          35.27
      3370        76.8644        1215.00        1158.38          34.86
      3371        76.8852        1079.00        1103.12          32.85
      3372        76.9059        1067.00        1056.52          32.67
      3373        76.9267        1050.00        1021.84          32.40
      3374        76.9475        1029.00         997.64          32.08
      3375        76.9682        1009.00         981.47          31.76
      3376        76.9890         998.00         971.04          31.59
      3377        77.0098        1014.00         964.48          31.84
      3378        77.0305         970.00         960.86          31.14
      3379        77.0513         994.00         959.08          31.53
      3380        77.0720        1004.00         957.73          31.69
      3381        77.0928        1007.00         954.91          31.73
      3382        77.1135         930.00         951.69          30.50
      3383        77.1343         966.00         947.40          31.08
      3384        77.1551         986.00         943.96          31.40
      3385        77.1758         942.00         941.58          30.69
      3386        77.1966         927.00         939.89          30.45
      3387        77.2173        1025.00         938.85          32.02
      3388        77.2381         963.00         938.33          31.03
      3389        77.2589         996.00         938.42          31.56
      3390        77.2796         950.00         939.10          30.82
      3391        77.3004         950.00         940.60          30.82
      3392        77.3211         922.00         943.24          30.36
      3393        77.3419         978.00         949.39          31.27
      3394        77.3627         996.00         955.17          31.56
      3395        77.3834        1002.00         961.98          31.65
      3396        77.4042         980.00         967.60          31.31
      3397        77.4249        1022.00         968.95          31.97
      3398        77.4457         973.00         965.76          31.19
      3399        77.4665         960.00         961.74          30.98
      3400        77.4872         953.00         958.17          30.87
      3401        77.5080         939.00         957.42          30.64
      3402        77.5287        1014.00         958.68          31.84
      3403        77.5495         972.00         962.85          31.18
      3404        77.5703         987.00         970.36          31.42
      3405        77.5910         975.00         981.74          31.23
      3406        77.6118        1002.00         997.03          31.65
      3407        77.6325         990.00        1014.97          31.46
      3408        77.6533        1002.00        1032.81          31.65
      3409        77.6741         980.00        1047.94          31.31
      3410        77.6948        1051.00        1061.08          32.42
      3411        77.7156        1057.00        1077.71          32.51
      3412        77.7364        1090.00        1104.24          33.02
      3413        77.7571        1084.00        1141.87          32.92
      3414        77.7779        1143.00        1182.32          33.81
      3415        77.7986        1199.00        1205.41          34.63
      3416        77.8194        1124.00        1194.18          33.53
      3417        77.8401        1100.00        1157.98          33.17
      3418        77.8609        1051.00        1118.85          32.42
      3419        77.8817        1061.00        1089.70          32.57
      3420        77.9024        1005.00        1070.63          31.70
      3421        77.9232        1050.00        1061.08          32.40
      3422        77.9439        1035.00        1060.79          32.17
      3423        77.9647        1067.00        1070.50          32.67
      3424        77.9855        1092.00        1089.60          33.05
      3425        78.0062        1147.00        1114.06          33.87
      3426        78.0270        1114.00        1135.36          33.38
      3427        78.0477        1140.00        1147.32          33.76
      3428        78.0685        1175.00        1157.77          34.28
      3429        78.0893        1172.00        1182.34          34.23
      3430        78.1100        1237.00        1231.53          35.17
      3431        78.1308        1262.00        1307.00          35.52
      3432        78.1516        1548.00        1396.64          39.34
      3433        78.1723        1503.00        1465.30          38.77
      3434        78.1931        1436.00        1475.02          37.89
      3435        78.2138        1425.00        1436.11          37.75
      3436        78.2346        1387.00        1389.98          37.24
      3437        78.2553        1330.00        1357.56          36.47
      3438        78.2761        1391.00        1327.66          37.30
      3439        78.2969        1256.00        1285.91          35.44
      3440        78.3176        1272.00        1247.58          35.67
      3441        78.3384        1292.00        1232.73          35.94
      3442        78.3591        1307.00        1245.78          36.15
      3443        78.3799        1364.00        1280.29          36.93
      3444        78.4007        1461.00        1319.18          38.22
      3445        78.4214        1493.00        1341.82          38.64
      3446        78.4422        1507.00        1349.72          38.82
      3447        78.4629        1557.00        1359.82          39.46
      3448        78.4837        1511.00        1374.20          38.87
      3449        78.5045        1581.00        1374.56          39.76
      3450        78.5252        1518.00        1350.53          38.96
      3451        78.5460        1497.00        1321.58          38.69
      3452        78.5667        1532.00        1314.46          39.14
      3453        78.5875        1514.00        1345.20          38.91
      3454        78.6083        1609.00        1422.09          40.11
      3455        78.6290        1784.00        1553.54          42.24
      3456        78.6498        1868.00        1743.53          43.22
      3457        78.6705        2077.00        1980.97          45.57
      3458        78.6913        2333.00        2213.58          48.30
      3459        78.7121        2574.00        2330.48          50.73
      3460        78.7328        2705.00        2259.20          52.01
      3461        78.7536        2453.00        2073.45          49.53
      3462        78.7743        2069.00        1884.78          45.49
      3463        78.7951        1834.00        1754.37          42.83
      3464        78.8159        1707.00        1707.18          41.32
      3465        78.8366        1758.00        1754.29          41.93
      3466        78.8574        1963.00        1897.99          44.31
      3467        78.8782        2028.00        2118.56          45.03
      3468        78.8989        2252.00        2348.61          47.46
      3469        78.9197        2357.00        2489.74          48.55
      3470        78.9404        2570.00        2481.83          50.70
      3471        78.9612        2514.00        2346.70          50.14
      3472        78.9819        2282.00        2174.46          47.77
      3473        79.0027        2002.00        2051.23          44.74
      3474        79.0235        2010.00        2014.58          44.83
      3475        79.0442        2040.00        2060.84          45.17
      3476        79.0650        2068.00        2153.52          45.48
      3477        79.0857        2294.00        2241.43          47.90
      3478        79.1065        2323.00        2298.92          48.20
      3479        79.1273        2088.00        2328.76          45.69
      3480        79.1480        2121.00        2321.75          46.05
      3481        79.1688        2129.00        2251.35          46.14
      3482        79.1895        1987.00        2115.04          44.58
      3483        79.2103        1787.00        1950.17          42.27
      3484        79.2311        1633.00        1799.37          40.41
      3485        79.2518        1511.00        1690.81          38.87
      3486        79.2726        1507.00        1632.16          38.82
      3487        79.2934        1523.00        1609.60          39.03
      3488        79.3141        1557.00        1595.35          39.46
      3489        79.3349        1585.00        1568.91          39.81
      3490        79.3556        1469.00        1534.53          38.33
      3491        79.3764        1430.00        1507.89          37.82
      3492        79.3971        1349.00        1487.92          36.73
      3493        79.4179        1333.00        1462.91          36.51
      3494        79.4387        1310.00        1430.15          36.19
      3495        79.4594        1327.00        1401.96          36.43
      3496        79.4802        1332.00        1394.88          36.50
      3497        79.5009        1368.00        1421.34          36.99
      3498        79.5217        1469.00        1483.48          38.33
      3499        79.5425        1721.00        1564.47          41.48
      3500        79.5632        1781.00        1616.76          42.20
      3501        79.5840        1538.00        1588.12          39.22
      3502        79.6047        1451.00        1488.53          38.09
      3503        79.6255        1295.00        1371.60          35.99
      3504        79.6463        1216.00        1273.13          34.87
      3505        79.6670        1160.00        1204.17          34.06
      3506        79.6878        1145.00        1164.93          33.84
      3507        79.7085        1152.00        1152.33          33.94
      3508        79.7293        1185.00        1162.82          34.42
      3509        79.7501        1232.00        1192.92          35.10
      3510        79.7708        1382.00        1236.03          37.18
      3511        79.7916        1337.00        1274.58          36.56
      3512        79.8123        1251.00        1280.52          35.37
      3513        79.8331        1210.00        1244.53          34.79
      3514        79.8539        1163.00        1188.89          34.10
      3515        79.8746        1120.00        1136.98          33.47
      3516        79.8954        1041.00        1098.67          32.26
      3517        79.9161        1081.00        1075.23          32.88
      3518        79.9369        1077.00        1062.92          32.82
      3519        79.9577        1035.00        1056.59          32.17
      3520        79.9784         992.00        1056.15          31.50
      3521        79.9992        1056.00        1063.19          32.50
      3522        80.0200         981.00        1076.21          31.32
      3523        80.0407        1025.00        1090.06          32.02
      3524        80.0615        1003.00        1102.93          31.67
      3525        80.0822        1074.00        1122.26          32.77
      3526        80.1030        1129.00        1157.48          33.60
      3527        80.1237        1213.00        1215.26          34.83
      3528        80.1445        1287.00        1295.20          35.87
      3529        80.1653        1464.00        1377.76          38.26
      3530        80.1860        1468.00        1412.01          38.31
      3531        80.2068        1277.00        1369.24          35.74
      3532        80.2275        1262.00        1289.44          35.52
      3533        80.2483        1155.00        1214.74          33.99
      3534        80.2691        1130.00        1157.72          33.62
      3535        80.2898        1050.00        1117.23          32.40
      3536        80.3106        1069.00        1091.95          32.70
      3537        80.3313        1040.00        1083.08          32.25
      3538        80.3521        1047.00        1091.36          32.36
      3539        80.3729        1137.00        1116.19          33.72
      3540        80.3936        1151.00        1152.19          33.93
      3541        80.4144        1202.00        1181.86          34.67
      3542        80.4352        1159.00        1179.91          34.04
      3543        80.4559        1078.00        1148.25          32.83
      3544        80.4767        1046.00        1108.01          32.34
      3545        80.4974        1050.00        1069.38          32.40
      3546        80.5182        1012.00        1036.38          31.81
      3547        80.5389         966.00        1011.64          31.08
      3548        80.5597         996.00         994.73          31.56
      3549        80.5805        1046.00         985.16          32.34
      3550        80.6012         952.00         981.42          30.85
      3551        80.6220         980.00         983.24          31.31
      3552        80.6427         989.00         991.08          31.45
      3553        80.6635        1017.00        1005.87          31.89
      3554        80.6843         978.00        1028.18          31.27
      3555        80.7050        1077.00        1056.98          32.82
      3556        80.7258        1113.00        1087.18          33.36
      3557        80.7465        1010.00        1109.80          31.78
      3558        80.7673        1064.00        1115.97          32.62
      3559        80.7881        1097.00        1102.62          33.12
      3560        80.8088        1063.00        1076.78          32.60
      3561        80.8296        1060.00        1048.51          32.56
      3562        80.8503        1035.00        1024.64          32.17
      3563        80.8711        1063.00        1008.38          32.60
      3564        80.8919        1105.00        1000.87          33.24
      3565        80.9126        1125.00        1002.09          33.54
      3566        80.9334        1119.00        1011.41          33.45
      3567        80.9541        1158.00        1027.26          34.03
      3568        80.9749        1191.00        1046.67          34.51
      3569        80.9957        1200.00        1062.51          34.64
      3570        81.0164        1188.00        1067.89          34.47
      3571        81.0372        1169.00        1060.45          34.19
      3572        81.0579        1164.00        1046.40          34.12
      3573        81.0787        1171.00        1034.88          34.22
      3574        81.0995        1178.00        1030.81          34.32
      3575        81.1202        1107.00        1037.15          33.27
      3576        81.1410        1173.00        1055.86          34.25
      3577        81.1618        1205.00        1087.63          34.71
      3578        81.1825        1319.00        1131.28          36.32
      3579        81.2033        1381.00        1180.75          37.16
      3580        81.2240        1384.00        1217.22          37.20
      3581        81.2448        1399.00        1223.92          37.40
      3582        81.2655        1242.00        1201.27          35.24
      3583        81.2863        1264.00        1167.60          35.55
      3584        81.3071        1214.00        1140.23          34.84
      3585        81.3278        1219.00        1130.88          34.91
      3586        81.3486        1235.00        1142.27          35.14
      3587        81.3693        1241.00        1180.32          35.23
      3588        81.3901        1267.00        1249.65          35.59
      3589        81.4109        1255.00        1353.16          35.43
      3590        81.4316        1452.00        1488.74          38.11
      3591        81.4524        1645.00        1639.55          40.56
      3592        81.4731        1766.00        1766.98          42.02
      3593        81.4939        1855.00        1822.38          43.07
      3594        81.5147        1891.00        1782.87          43.49
      3595        81.5354        1714.00        1671.21          41.40
      3596        81.5562        1501.00        1534.87          38.74
      3597        81.5770        1300.00        1411.88          36.06
      3598        81.5977        1203.00        1321.50          34.68
      3599        81.6185        1206.00        1269.04          34.73
      3600        81.6392        1155.00        1252.40          33.99
      3601        81.6600        1202.00        1265.21          34.67
      3602        81.6807        1234.00        1299.45          35.13
      3603        81.7015        1271.00        1344.42          35.65
      3604        81.7223        1302.00        1383.01          36.08
      3605        81.7430        1353.00        1392.92          36.78
      3606        81.7638        1469.00        1361.99          38.33
      3607        81.7845        1319.00        1299.36          36.32
      3608        81.8053        1172.00        1226.35          34.23
      3609        81.8261        1092.00        1159.66          33.05
      3610        81.8468         986.00        1106.88          31.40
      3611        81.8676        1029.00        1068.92          32.08
      3612        81.8883        1022.00        1043.30          31.97
      3613        81.9091        1019.00        1026.06          31.92
      3614        81.9299        1015.00        1014.06          31.86
      3615        81.9506         979.00        1006.34          31.29
      3616        81.9714         973.00        1002.00          31.19
      3617        81.9921         982.00        1000.75          31.34
      3618        82.0129         944.00        1002.91          30.72
      3619        82.0337        1013.00        1007.73          31.83
      3620        82.0544         977.00        1018.88          31.26
      3621        82.0752        1059.00        1038.77          32.54
      3622        82.0959        1062.00        1068.28          32.59
      3623        82.1167        1087.00        1101.16          32.97
      3624        82.1375        1104.00        1117.89          33.23
      3625        82.1582        1104.00        1102.72          33.23
      3626        82.1790        1060.00        1069.26          32.56
      3627        82.1997        1095.00        1038.15          33.09
      3628        82.2205         970.00        1017.09          31.14
      3629        82.2413         997.00        1006.23          31.58
      3630        82.2620         993.00        1003.75          31.51
      3631        82.2828        1023.00        1006.43          31.98
      3632        82.3036         953.00        1010.76          30.87
      3633        82.3243        1013.00        1016.54          31.83
      3634        82.3451        1015.00        1026.63          31.86
      3635        82.3658        1023.00        1039.40          31.98
      3636        82.3866        1119.00        1045.33          33.45
      3637        82.4073        1012.00        1037.32          31.81
      3638        82.4281        1010.00        1022.61          31.78
      3639        82.4489        1051.00        1011.13          32.42
      3640        82.4696        1005.00        1005.82          31.70
      3641        82.4904        1040.00        1007.01          32.25
      3642        82.5111        1021.00        1013.48          31.95
      3643        82.5319        1028.00        1022.70          32.06
      3644        82.5527        1017.00        1030.89          31.89
      3645        82.5734        1076.00        1036.08          32.80
      3646        82.5942        1032.00        1039.47          32.12
      3647        82.6149        1112.00        1043.41          33.35
      3648        82.6357        1065.00        1052.01          32.63
      3649        82.6565        1047.00        1067.76          32.36
      3650        82.6772        1028.00        1095.41          32.06
      3651        82.6980        1097.00        1139.93          33.12
      3652        82.7188        1155.00        1206.69          33.99
      3653        82.7395        1282.00        1300.17          35.81
      3654        82.7603        1405.00        1421.02          37.48
      3655        82.7810        1526.00        1559.25          39.06
      3656        82.8018        1702.00        1688.84          41.26
      3657        82.8225        1759.00        1778.53          41.94
      3658        82.8433        1739.00        1824.53          41.70
      3659        82.8641        1737.00        1860.29          41.68
      3660        82.8848        1870.00        1929.95          43.24
      3661        82.9056        2112.00        2056.81          45.96
      3662        82.9263        2338.00        2226.52          48.35
      3663        82.9471        2651.00        2386.97          51.49
      3664        82.9679        2657.00        2489.99          51.55
      3665        82.9886        2446.00        2537.56          49.46
      3666        83.0094        2374.00        2556.13          48.72
      3667        83.0301        2392.00        2546.05          48.91
      3668        83.0509        2410.00        2473.91          49.09
      3669        83.0717        2270.00        2322.33          47.64
      3670        83.0924        1986.00        2128.64          44.56
      3671        83.1132        1758.00        1950.02          41.93
      3672        83.1339        1666.00        1825.26          40.82
      3673        83.1547        1682.00        1765.92          41.01
      3674        83.1755        1792.00        1759.41          42.33
      3675        83.1962        1738.00        1772.88          41.69
      3676        83.2170        1813.00        1772.97          42.58
      3677        83.2377        1729.00        1751.15          41.58
      3678        83.2585        1622.00        1716.08          40.27
      3679        83.2793        1622.00        1668.58          40.27
      3680        83.3000        1527.00        1597.31          39.08
      3681        83.3208        1425.00        1496.20          37.75
      3682        83.3415        1294.00        1381.38          35.97
      3683        83.3623        1190.00        1275.92          34.50
      3684        83.3831        1136.00        1190.69          33.70
      3685        83.4038        1075.00        1126.44          32.79
      3686        83.4246        1070.00        1080.04          32.71
      3687        83.4454        1025.00        1047.42          32.02
      3688        83.4661        1011.00        1025.09          31.80
      3689        83.4869         991.00        1010.04          31.48
      3690        83.5076         997.00        1000.29          31.58
      3691        83.5284         973.00         994.41          31.19
      3692        83.5491         990.00         991.41          31.46
      3693        83.5699         971.00         990.46          31.16
      3694        83.5907         983.00         991.41          31.35
      3695        83.6114        1028.00         995.37          32.06
      3696        83.6322         976.00        1004.11          31.24
      3697        83.6529        1025.00        1020.05          32.02
      3698        83.6737        1035.00        1046.44          32.17
      3699        83.6945        1084.00        1086.67          32.92
      3700        83.7152        1074.00        1144.92          32.77
      3701        83.7360        1238.00        1223.14          35.19
      3702        83.7567        1225.00        1316.69          35.00
      3703        83.7775        1380.00        1402.88          37.15
      3704        83.7983        1266.00        1437.61          35.58
      3705        83.8190        1241.00        1397.82          35.23
      3706        83.8398        1174.00        1317.14          34.26
      3707        83.8605        1201.00        1238.94          34.66
      3708        83.8813        1063.00        1181.38          32.60
      3709        83.9021        1138.00        1150.31          33.73
      3710        83.9228        1083.00        1146.96          32.91
      3711        83.9436        1160.00        1171.67          34.06
      3712        83.9643        1146.00        1225.81          33.85
      3713        83.9851        1296.00        1307.67          36.00
      3714        84.0059        1403.00        1409.70          37.46
      3715        84.0266        1434.00        1509.51          37.87
      3716        84.0474        1610.00        1565.57          40.12
      3717        84.0681        1551.00        1547.88          39.38
      3718        84.0889        1387.00        1471.67          37.24
      3719        84.1097        1301.00        1377.32          36.07
      3720        84.1304        1212.00        1293.73          34.81
      3721        84.1512        1184.00        1232.83          34.41
      3722        84.1719        1133.00        1196.43          33.66
      3723        84.1927        1215.00        1180.31          34.86
      3724        84.2135        1148.00        1180.76          33.88
      3725        84.2342        1120.00        1197.12          33.47
      3726        84.2550        1181.00        1228.20          34.37
      3727        84.2757        1203.00        1266.31          34.68
      3728        84.2965        1310.00        1294.37          36.19
      3729        84.3173        1266.00        1294.92          35.58
      3730        84.3380        1268.00        1266.80          35.61
      3731        84.3588        1160.00        1224.79          34.06
      3732        84.3795        1161.00        1184.82          34.07
      3733        84.4003        1091.00        1157.04          33.03
      3734        84.4211        1112.00        1146.64          33.35
      3735        84.4418        1152.00        1156.23          33.94
      3736        84.4626        1192.00        1188.32          34.53
      3737        84.4833        1188.00        1247.88          34.47
      3738        84.5041        1281.00        1340.74          35.79
      3739        84.5249        1440.00        1468.56          37.95
      3740        84.5456        1779.00        1621.68          42.18
      3741        84.5664        1988.00        1770.17          44.59
      3742        84.5872        2041.00        1862.43          45.18
      3743        84.6079        1897.00        1852.44          43.55
      3744        84.6287        1596.00        1743.30          39.95
      3745        84.6494        1388.00        1589.11          37.26
      3746        84.6702        1373.00        1442.31          37.05
      3747        84.6909        1282.00        1327.70          35.81
      3748        84.7117        1234.00        1252.49          35.13
      3749        84.7325        1240.00        1216.97          35.21
      3750        84.7532        1246.00        1218.92          35.30
      3751        84.7740        1260.00        1255.19          35.50
      3752        84.7947        1378.00        1320.86          37.12
      3753        84.8155        1513.00        1406.90          38.90
      3754        84.8363        1592.00        1489.66          39.90
      3755        84.8570        1625.00        1542.27          40.31
      3756        84.8778        1523.00        1546.43          39.03
      3757        84.8985        1548.00        1506.19          39.34
      3758        84.9193        1406.00        1438.22          37.50
      3759        84.9401        1380.00        1362.55          37.15
      3760        84.9608        1274.00        1299.90          35.69
      3761        84.9816        1238.00        1264.71          35.19
      3762        85.0023        1242.00        1264.39          35.24
      3763        85.0231        1334.00        1301.43          36.52
      3764        85.0439        1354.00        1375.44          36.80
      3765        85.0646        1471.00        1480.30          38.35
      3766        85.0854        1600.00        1597.67          40.00
      3767        85.1061        1743.00        1692.42          41.75
      3768        85.1269        1977.00        1726.18          44.46
      3769        85.1477        1844.00        1690.29          42.94
      3770        85.1684        1653.00        1607.30          40.66
      3771        85.1892        1503.00        1506.03          38.77
      3772        85.2099        1396.00        1411.45          37.36
      3773        85.2307        1318.00        1341.25          36.30
      3774        85.2515        1190.00        1303.25          34.50
      3775        85.2722        1311.00        1296.43          36.21
      3776        85.2930        1318.00        1313.46          36.30
      3777        85.3137        1345.00        1345.96          36.67
      3778        85.3345        1412.00        1388.16          37.58
      3779        85.3553        1468.00        1430.04          38.31
      3780        85.3760        1460.00        1453.14          38.21
      3781        85.3968        1534.00        1444.74          39.17
      3782        85.4175        1456.00        1413.89          38.16
      3783        85.4383        1458.00        1379.47          38.18
      3784        85.4591        1334.00        1353.47          36.52
      3785        85.4798        1320.00        1339.51          36.33
      3786        85.5006        1376.00        1340.31          37.09
      3787        85.5213        1277.00        1360.07          35.74
      3788        85.5421        1354.00        1392.90          36.80
      3789        85.5629        1397.00        1415.29          37.38
      3790        85.5836        1400.00        1405.46          37.42
      3791        85.6044        1399.00        1363.39          37.40
      3792        85.6251        1299.00        1303.39          36.04
      3793        85.6459        1243.00        1241.36          35.26
      3794        85.6667        1288.00        1187.73          35.89
      3795        85.6874        1122.00        1148.62          33.50
      3796        85.7082        1096.00        1125.88          33.11
      3797        85.7290        1094.00        1117.76          33.08
      3798        85.7497        1206.00        1121.45          34.73
      3799        85.7705        1167.00        1136.70          34.16
      3800        85.7912        1196.00        1163.65          34.58
      3801        85.8120        1140.00        1195.54          33.76
      3802        85.8327        1226.00        1215.86          35.01
      3803        85.8535        1206.00        1210.01          34.73
      3804        85.8743        1192.00        1177.49          34.53
      3805        85.8950        1099.00        1131.78          33.15
      3806        85.9158        1068.00        1087.03          32.68
      3807        85.9365        1073.00        1050.20          32.76
      3808        85.9573        1035.00        1024.18          32.17
      3809        85.9781        1038.00        1009.39          32.22
      3810        85.9988        1006.00        1006.08          31.72
      3811        86.0196        1040.00        1014.83          32.25
      3812        86.0403        1112.00        1037.05          33.35
      3813        86.0611        1073.00        1074.45          32.76
      3814        86.0819        1113.00        1127.97          33.36
      3815        86.1026        1159.00        1195.30          34.04
      3816        86.1234        1309.00        1270.19          36.18
      3817        86.1441        1400.00        1341.84          37.42
      3818        86.1649        1429.00        1391.32          37.80
      3819        86.1857        1534.00        1396.87          39.17
      3820        86.2064        1376.00        1353.63          37.09
      3821        86.2272        1302.00        1280.71          36.08
      3822        86.2479        1214.00        1203.16          34.84
      3823        86.2687        1097.00        1137.23          33.12
      3824        86.2895        1063.00        1089.74          32.60
      3825        86.3102        1084.00        1061.80          32.92
      3826        86.3310        1029.00        1052.84          32.08
      3827        86.3517        1068.00        1061.18          32.68
      3828        86.3725        1131.00        1084.61          33.63
      3829        86.3933        1100.00        1119.36          33.17
      3830        86.4140        1251.00        1158.32          35.37
      3831        86.4348        1314.00        1190.00          36.25
      3832        86.4556        1226.00        1204.18          35.01
      3833        86.4763        1295.00        1202.24          35.99
      3834        86.4971        1197.00        1197.13          34.60
      3835        86.5178        1225.00        1203.12          35.00
      3836        86.5386        1182.00        1227.28          34.38
      3837        86.5593        1257.00        1265.26          35.45
      3838        86.5801        1292.00        1304.66          35.94
      3839        86.6009        1316.00        1339.35          36.28
      3840        86.6216        1415.00        1371.53          37.62
      3841        86.6424        1305.00        1398.92          36.12
      3842        86.6631        1286.00        1418.72          35.86
      3843        86.6839        1343.00        1437.26          36.65
      3844        86.7047        1376.00        1466.43          37.09
      3845        86.7254        1448.00        1510.85          38.05
      3846        86.7462        1516.00        1557.57          38.94
      3847        86.7669        1543.00        1581.79          39.28
      3848        86.7877        1443.00        1569.25          37.99
      3849        86.8085        1465.00        1531.35          38.28
      3850        86.8292        1362.00        1488.61          36.91
      3851        86.8500        1364.00        1449.36          36.93
      3852        86.8708        1416.00        1412.33          37.63
      3853        86.8915        1436.00        1375.34          37.89
      3854        86.9123        1300.00        1338.07          36.06
      3855        86.9330        1245.00        1302.35          35.28
      3856        86.9538        1194.00        1273.33          34.55
      3857        86.9745        1147.00        1256.83          33.87
      3858        86.9953        1305.00        1253.70          36.12
      3859        87.0161        1206.00        1255.80          34.73
      3860        87.0368        1190.00        1249.35          34.50
      3861        87.0576        1173.00        1226.83          34.25
      3862        87.0783        1152.00        1192.87          33.94
      3863        87.0991        1128.00        1156.99          33.59
      3864        87.1199        1119.00        1122.94          33.45
      3865        87.1406        1094.00        1089.03          33.08
      3866        87.1614        1110.00        1056.24          33.32
      3867        87.1821        1134.00        1027.57          33.67
      3868        87.2029        1037.00        1004.91          32.20
      3869        87.2237        1021.00         986.61          31.95
      3870        87.2444        1036.00         970.01          32.19
      3871        87.2652         999.00         952.93          31.61
      3872        87.2859         990.00         938.29          31.46
      3873        87.3067         965.00         927.64          31.06
      3874        87.3275         992.00         921.03          31.50
      3875        87.3482         953.00         917.72          30.87
      3876        87.3690         933.00         917.07          30.55
      3877        87.3897         918.00         914.79          30.30
      3878        87.4105         963.00         910.46          31.03
      3879        87.4313         958.00         905.76          30.95
      3880        87.4520         995.00         902.14          31.54
      3881        87.4728         931.00         900.06          30.51
      3882        87.4935         937.00         898.78          30.61
      3883        87.5143         911.00         896.64          30.18
      3884        87.5351         991.00         893.47          31.48
      3885        87.5558         940.00         890.58          30.66
      3886        87.5766         894.00         889.37          29.90
      3887        87.5974         879.00         890.24          29.65
      3888        87.6181         915.00         893.37          30.25
      3889        87.6389         968.00         898.59          31.11
      3890        87.6596         968.00         905.16          31.11
      3891        87.6804        1018.00         911.14          31.91
      3892        87.7011         952.00         914.21          30.85
      3893        87.7219         963.00         912.18          31.03
      3894        87.7427         929.00         906.72          30.48
      3895        87.7634         971.00         900.18          31.16
      3896        87.7842         959.00         894.86          30.97
      3897        87.8049         865.00         891.65          29.41
      3898        87.8257         964.00         890.81          31.05
      3899        87.8465         910.00         892.52          30.17
      3900        87.8672         920.00         896.64          30.33
      3901        87.8880         929.00         902.98          30.48
      3902        87.9087         884.00         911.15          29.73
      3903        87.9295         947.00         920.71          30.77
      3904        87.9503         995.00         931.37          31.54
      3905        87.9710         988.00         942.94          31.43
      3906        87.9918         988.00         955.07          31.43
      3907        88.0126         979.00         967.49          31.29
      3908        88.0333        1010.00         978.71          31.78
      3909        88.0541         923.00         987.15          30.38
      3910        88.0748         981.00         993.49          31.32
      3911        88.0956         934.00        1000.35          30.56
      3912        88.1163         965.00        1006.32          31.06
      3913        88.1371        1049.00        1005.86          32.39
      3914        88.1579        1023.00         997.39          31.98
      3915        88.1786        1050.00         986.54          32.40
      3916        88.1994        1002.00         979.03          31.65
      3917        88.2201        1002.00         978.22          31.65
      3918        88.2409        1064.00         985.46          32.62
      3919        88.2617        1052.00        1001.49          32.43
      3920        88.2824        1006.00        1025.02          31.72
      3921        88.3032        1092.00        1051.36          33.05
      3922        88.3239        1136.00        1071.18          33.70
      3923        88.3447        1149.00        1075.39          33.90
      3924        88.3655        1143.00        1064.35          33.81
      3925        88.3862        1082.00        1045.93          32.89
      3926        88.4070        1088.00        1025.31          32.98
      3927        88.4277        1050.00        1004.28          32.40
      3928        88.4485        1018.00         985.77          31.91
      3929        88.4693        1026.00         972.69          32.03
      3930        88.4900        1020.00         966.37          31.94
      3931        88.5108         957.00         967.21          30.94
      3932        88.5315        1044.00         975.42          32.31
      3933        88.5523        1006.00         991.24          31.72
      3934        88.5731        1065.00        1014.56          32.63
      3935        88.5938        1012.00        1043.99          31.81
      3936        88.6146        1105.00        1076.96          33.24
      3937        88.6353        1155.00        1113.38          33.99
      3938        88.6561        1257.00        1156.06          35.45
      3939        88.6769        1241.00        1204.53          35.23
      3940        88.6976        1433.00        1248.28          37.85
      3941        88.7184        1419.00        1268.67          37.67
      3942        88.7392        1318.00        1254.72          36.30
      3943        88.7599        1239.00        1214.74          35.20
      3944        88.7807        1115.00        1167.63          33.39
      3945        88.8014        1111.00        1128.33          33.33
      3946        88.8222        1149.00        1103.70          33.90
      3947        88.8429        1114.00        1094.62          33.38
      3948        88.8637        1052.00        1097.18          32.43
      3949        88.8845        1131.00        1105.91          33.63
      3950        88.9052        1108.00        1120.77          33.29
      3951        88.9260        1134.00        1147.30          33.67
      3952        88.9467        1222.00        1187.40          34.96
      3953        88.9675        1255.00        1238.74          35.43
      3954        88.9883        1323.00        1293.86          36.37
      3955        89.0090        1367.00        1347.46          36.97
      3956        89.0298        1393.00        1404.65          37.32
      3957        89.0505        1381.00        1477.07          37.16
      3958        89.0713        1515.00        1568.46          38.92
      3959        89.0921        1652.00        1659.78          40.64
      3960        89.1128        1732.00        1708.84          41.62
      3961        89.1336        1554.00        1687.02          39.42
      3962        89.1544        1518.00        1611.15          38.96
      3963        89.1751        1481.00        1518.56          38.48
      3964        89.1959        1347.00        1437.89          36.70
      3965        89.2166        1300.00        1384.78          36.06
      3966        89.2374        1269.00        1366.30          35.62
      3967        89.2581        1322.00        1384.36          36.36
      3968        89.2789        1391.00        1438.45          37.30
      3969        89.2997        1580.00        1526.63          39.75
      3970        89.3204        1584.00        1645.80          39.80
      3971        89.3412        1766.00        1788.87          42.02
      3972        89.3619        1898.00        1932.62          43.57
      3973        89.3827        2183.00        2029.63          46.72
      3974        89.4035        2120.00        2034.43          46.04
      3975        89.4242        1977.00        1945.95          44.46
      3976        89.4450        1630.00        1802.04          40.37
      3977        89.4657        1544.00        1645.30          39.29
      3978        89.4865        1370.00        1504.83          37.01
      3979        89.5073        1269.00        1395.51          35.62
      3980        89.5280        1224.00        1321.47          34.99
      3981        89.5488        1277.00        1283.00          35.74
      3982        89.5695        1254.00        1276.65          35.41
      3983        89.5903        1204.00        1297.04          34.70
      3984        89.6111        1280.00        1337.34          35.78
      3985        89.6318        1374.00        1387.56          37.07
      3986        89.6526        1495.00        1429.49          38.67
      3987        89.6733        1452.00        1441.40          38.11
      3988        89.6941        1471.00        1413.44          38.35
      3989        89.7149        1348.00        1353.08          36.72
      3990        89.7356        1347.00        1277.36          36.70
      3991        89.7564        1119.00        1202.28          33.45
      3992        89.7771        1071.00        1137.39          32.73
      3993        89.7979        1057.00        1086.81          32.51
      3994        89.8187        1038.00        1050.77          32.22
      3995        89.8394         995.00        1028.29          31.54
      3996        89.8602         961.00        1017.22          31.00
      3997        89.8810        1000.00        1016.42          31.62
      3998        89.9017         964.00        1018.64          31.05
      3999        89.9225         998.00        1021.05          31.59
      4000        89.9432        1057.00        1019.37          32.51
      4001        89.9640        1030.00        1011.37          32.09
      4002        89.9847        1011.00         997.94          31.80
      4003        90.0055        1068.00         982.09          32.68
      4004        90.0263         983.00         967.08          31.35
      4005        90.0470         957.00         955.04          30.94
      4006        90.0678         888.00         946.82          29.80
      4007        90.0885         976.00         942.57          31.24
      4008        90.1093         945.00         942.05          30.74
      4009        90.1301         966.00         944.73          31.08
      4010        90.1508         957.00         949.67          30.94
      4011        90.1716         987.00         955.49          31.42
      4012        90.1923         983.00         960.57          31.35
      4013        90.2131         982.00         963.90          31.34
      4014        90.2339        1022.00         965.90          31.97
      4015        90.2546         989.00         968.39          31.45
      4016        90.2754         965.00         973.83          31.06
      4017        90.2962         973.00         984.38          31.19
      4018        90.3169         992.00        1001.45          31.50
      4019        90.3377        1019.00        1025.09          31.92
      4020        90.3584        1072.00        1052.82          32.74
      4021        90.3792        1089.00        1078.65          33.00
      4022        90.3999        1112.00        1094.98          33.35
      4023        90.4207        1213.00        1097.78          34.83
      4024        90.4415        1194.00        1087.81          34.55
      4025        90.4622        1149.00        1069.14          33.90
      4026        90.4830        1041.00        1047.05          32.26
      4027        90.5037        1020.00        1026.00          31.94
      4028        90.5245        1009.00        1009.08          31.76
      4029        90.5453         969.00         998.01          31.13
      4030        90.5660         962.00         993.33          31.02
      4031        90.5868         960.00         994.96          30.98
      4032        90.6075         988.00        1002.36          31.43
      4033        90.6283        1023.00        1014.27          31.98
      4034        90.6491        1039.00        1027.92          32.23
      4035        90.6698        1066.00        1039.22          32.65
      4036        90.6906        1044.00        1044.38          32.31
      4037        90.7113        1081.00        1042.72          32.88
      4038        90.7321        1058.00        1036.49          32.53
      4039        90.7529         993.00        1029.55          31.51
      4040        90.7736        1099.00        1026.12          33.15
      4041        90.7944        1016.00        1029.73          31.87
      4042        90.8151        1036.00        1042.93          32.19
      4043        90.8359        1027.00        1066.86          32.05
      4044        90.8567        1099.00        1101.00          33.15
      4045        90.8774        1096.00        1143.18          33.11
      4046        90.8982        1181.00        1189.53          34.37
      4047        90.9189        1247.00        1231.82          35.31
      4048        90.9397        1343.00        1256.01          36.65
      4049        90.9605        1243.00        1250.36          35.26
      4050        90.9812        1116.00        1215.47          33.41
      4051        91.0020        1117.00        1166.17          33.42
      4052        91.0228        1046.00        1116.28          32.34
      4053        91.0435         995.00        1074.00          31.54
      4054        91.0643        1085.00        1042.30          32.94
      4055        91.0850        1032.00        1022.32          32.12
      4056        91.1058        1014.00        1013.72          31.84
      4057        91.1265        1053.00        1015.36          32.45
      4058        91.1473        1061.00        1025.60          32.57
      4059        91.1681        1042.00        1042.08          32.28
      4060        91.1888        1084.00        1061.88          32.92
      4061        91.2096        1168.00        1080.32          34.18
      4062        91.2303        1119.00        1090.94          33.45
      4063        91.2511        1061.00        1086.72          32.57
      4064        91.2719        1082.00        1069.62          32.89
      4065        91.2926        1033.00        1046.35          32.14
      4066        91.3134         958.00        1023.32          30.95
      4067        91.3341         988.00        1003.84          31.43
      4068        91.3549        1015.00         989.21          31.86
      4069        91.3757        1051.00         979.58          32.42
      4070        91.3964         955.00         974.63          30.90
      4071        91.4172         968.00         973.76          31.11
      4072        91.4380        1041.00         977.00          32.26
      4073        91.4587        1061.00         983.92          32.57
      4074        91.4795        1021.00         994.94          31.95
      4075        91.5002        1058.00        1010.92          32.53
      4076        91.5210        1007.00        1033.15          31.73
      4077        91.5417        1134.00        1064.00          33.67
      4078        91.5625        1132.00        1104.63          33.65
      4079        91.5833        1251.00        1157.50          35.37
      4080        91.6040        1313.00        1221.99          36.24
      4081        91.6248        1372.00        1294.47          37.04
      4082        91.6455        1465.00        1367.07          38.28
      4083        91.6663        1430.00        1436.00          37.82
      4084        91.6871        1485.00        1508.52          38.54
      4085        91.7078        1582.00        1593.99          39.77
      4086        91.7286        1542.00        1693.93          39.27
      4087        91.7493        1726.00        1798.08          41.55
      4088        91.7701        1840.00        1895.94          42.90
      4089        91.7909        2036.00        1987.76          45.12
      4090        91.8116        2255.00        2066.07          47.49
      4091        91.8324        2362.00        2106.46          48.60
      4092        91.8531        2263.00        2085.22          47.57
      4093        91.8739        1999.00        2004.02          44.71
      4094        91.8947        1871.00        1893.37          43.26
      4095        91.9154        1799.00        1783.34          42.41
      4096        91.9362        1735.00        1686.14          41.65
      4097        91.9569        1660.00        1604.93          40.74
      4098        91.9777        1477.00        1544.02          38.43
      4099        91.9985        1456.00        1508.15          38.16
      4100        92.0192        1407.00        1496.96          37.51
      4101        92.0400        1396.00        1503.86          37.36
      4102        92.0607        1498.00        1520.96          38.70
      4103        92.0815        1555.00        1543.92          39.43
      4104        92.1023        1646.00        1568.68          40.57
      4105        92.1230        1682.00        1581.94          41.01
      4106        92.1438        1628.00        1568.61          40.35
      4107        92.1646        1571.00        1523.07          39.64
      4108        92.1853        1488.00        1453.35          38.57
      4109        92.2061        1399.00        1372.53          37.40
      4110        92.2268        1222.00        1291.17          34.96
      4111        92.2476        1215.00        1217.05          34.86
      4112        92.2683        1153.00        1154.16          33.96
      4113        92.2891        1059.00        1103.71          32.54
      4114        92.3099        1079.00        1065.21          32.85
      4115        92.3306         997.00        1037.18          31.58
      4116        92.3514         967.00        1018.16          31.10
      4117        92.3721        1007.00        1006.55          31.73
      4118        92.3929         925.00        1001.07          30.41
      4119        92.4137         972.00        1000.37          31.18
      4120        92.4344         963.00        1002.32          31.03
      4121        92.4552         930.00        1003.53          30.50
      4122        92.4759         999.00        1000.41          31.61
      4123        92.4967         978.00         991.85          31.27
      4124        92.5175         973.00         979.87          31.19
      4125        92.5382         925.00         967.37          30.41
      4126        92.5590         974.00         956.51          31.21
      4127        92.5798         953.00         947.87          30.87
      4128        92.6005         950.00         941.48          30.82
      4129        92.6213         951.00         937.01          30.84
      4130        92.6420         928.00         934.25          30.46
      4131        92.6628         938.00         932.92          30.63
      4132        92.6835         884.00         932.84          29.73
      4133        92.7043         911.00         933.79          30.18
      4134        92.7251         977.00         935.31          31.26
      4135        92.7458         927.00         936.56          30.45
      4136        92.7666         930.00         936.72          30.50
      4137        92.7873         942.00         935.81          30.69
      4138        92.8081         990.00         934.66          31.46
      4139        92.8289         916.00         934.24          30.27
      4140        92.8496         979.00         934.38          31.29
      4141        92.8704         867.00         935.68          29.44
      4142        92.8911         953.00         938.27          30.87
      4143        92.9119         922.00         942.37          30.36
      4144        92.9327         925.00         948.25          30.41
      4145        92.9534         915.00         956.20          30.25
      4146        92.9742         907.00         966.47          30.12
      4147        92.9949        1031.00         979.19          32.11
      4148        93.0157         978.00         993.89          31.27
      4149        93.0365         967.00        1010.71          31.10
      4150        93.0572        1014.00        1031.27          31.84
      4151        93.0780         967.00        1058.44          31.10
      4152        93.0987        1067.00        1094.49          32.67
      4153        93.1195        1084.00        1139.96          32.92
      4154        93.1403        1178.00        1192.33          34.32
      4155        93.1610        1216.00        1244.68          34.87
      4156        93.1818        1332.00        1284.95          36.50
      4157        93.2025        1370.00        1300.76          37.01
      4158        93.2233        1263.00        1288.77          35.54
      4159        93.2441        1235.00        1257.94          35.14
      4160        93.2648        1151.00        1221.80          33.93
      4161        93.2856        1173.00        1191.08          34.25
      4162        93.3064        1079.00        1172.64          32.85
      4163        93.3271        1069.00        1170.36          32.70
      4164        93.3479        1086.00        1187.19          32.95
      4165        93.3686        1042.00        1226.05          32.28
      4166        93.3894        1239.00        1288.78          35.20
      4167        93.4101        1271.00        1374.81          35.65
      4168        93.4309        1395.00        1479.34          37.35
      4169        93.4517        1512.00        1585.31          38.88
      4170        93.4724        1656.00        1664.93          40.69
      4171        93.4932        1708.00        1688.16          41.33
      4172        93.5139        1598.00        1647.67          39.97
      4173        93.5347        1497.00        1564.82          38.69
      4174        93.5555        1435.00        1468.21          37.88
      4175        93.5762        1244.00        1377.41          35.27
      4176        93.5970        1254.00        1302.22          35.41
      4177        93.6177        1153.00        1247.85          33.96
      4178        93.6385        1182.00        1217.29          34.38
      4179        93.6593        1105.00        1211.95          33.24
      4180        93.6800        1083.00        1232.00          32.91
      4181        93.7008        1215.00        1276.39          34.86
      4182        93.7215        1264.00        1342.03          35.55
      4183        93.7423        1371.00        1421.29          37.03
      4184        93.7631        1547.00        1497.77          39.33
      4185        93.7838        1584.00        1546.37          39.80
      4186        93.8046        1513.00        1547.88          38.90
      4187        93.8253        1399.00        1506.24          37.40
      4188        93.8461        1438.00        1443.58          37.92
      4189        93.8669        1230.00        1382.35          35.07
      4190        93.8876        1153.00        1335.92          33.96
      4191        93.9084        1165.00        1310.88          34.13
      4192        93.9291        1237.00        1308.74          35.17
      4193        93.9499        1287.00        1326.06          35.87
      4194        93.9707        1399.00        1353.43          37.40
      4195        93.9914        1307.00        1377.44          36.15
      4196        94.0122        1399.00        1387.75          37.40
      4197        94.0329        1433.00        1382.89          37.85
      4198        94.0537        1474.00        1366.82          38.39
      4199        94.0745        1422.00        1343.10          37.71
      4200        94.0952        1374.00        1312.40          37.07
      4201        94.1160        1234.00        1275.83          35.13
      4202        94.1367        1276.00        1238.35          35.72
      4203        94.1575        1248.00        1207.50          35.33
      4204        94.1783        1231.00        1189.47          35.09
      4205        94.1990        1276.00        1188.12          35.72
      4206        94.2198        1190.00        1205.61          34.50
      4207        94.2405        1213.00        1243.12          34.83
      4208        94.2613        1242.00        1300.60          35.24
      4209        94.2821        1353.00        1373.96          36.78
      4210        94.3028        1468.00        1456.58          38.31
      4211        94.3236        1594.00        1539.76          39.92
      4212        94.3443        1835.00        1611.10          42.84
      4213        94.3651        1902.00        1652.01          43.61
      4214        94.3859        1856.00        1646.58          43.08
      4215        94.4066        1670.00        1594.94          40.87
      4216        94.4274        1570.00        1514.15          39.62
      4217        94.4482        1352.00        1425.08          36.77
      4218        94.4689        1364.00        1341.29          36.93
      4219        94.4897        1234.00        1268.76          35.13
      4220        94.5104        1199.00        1210.17          34.63
      4221        94.5312        1111.00        1167.18          33.33
      4222        94.5519        1140.00        1141.04          33.76
      4223        94.5727        1204.00        1132.75          34.70
      4224        94.5935        1148.00        1140.30          33.88
      4225        94.6142        1178.00        1162.45          34.32
      4226        94.6350        1215.00        1196.65          34.86
      4227        94.6557        1305.00        1231.06          36.12
      4228        94.6765        1323.00        1256.15          36.37
      4229        94.6973        1295.00        1263.56          35.99
      4230        94.7180        1321.00        1254.21          36.35
      4231        94.7388        1256.00        1236.79          35.44
      4232        94.7595        1203.00        1220.70          34.68
      4233        94.7803        1189.00        1211.30          34.48
      4234        94.8011        1203.00        1209.29          34.68
      4235        94.8218        1179.00        1210.77          34.34
      4236        94.8426        1188.00        1206.50          34.47
      4237        94.8633        1101.00        1187.17          33.18
      4238        94.8841        1104.00        1152.86          33.23
      4239        94.9049        1071.00        1112.60          32.73
      4240        94.9256        1021.00        1074.23          31.95
      4241        94.9464         975.00        1041.64          31.23
      4242        94.9671        1025.00        1015.92          32.02
      4243        94.9879         994.00         996.79          31.53
      4244        95.0087         998.00         983.55          31.59
      4245        95.0294         973.00         975.87          31.19
      4246        95.0502        1010.00         973.81          31.78
      4247        95.0709         998.00         977.34          31.59
      4248        95.0917        1045.00         986.04          32.33
      4249        95.1125        1056.00         998.74          32.50
      4250        95.1332        1011.00        1012.14          31.80
      4251        95.1540        1082.00        1021.25          32.89
      4252        95.1747        1037.00        1021.69          32.20
      4253        95.1955        1049.00        1014.11          32.39
      4254        95.2163        1017.00        1003.42          31.89
      4255        95.2370        1029.00         993.87          32.08
      4256        95.2578         981.00         987.99          31.32
      4257        95.2785        1044.00         987.24          32.31
      4258        95.2993         995.00         992.70          31.54
      4259        95.3201        1030.00        1005.52          32.09
      4260        95.3408        1084.00        1027.40          32.92
      4261        95.3616        1045.00        1060.43          32.33
      4262        95.3823        1190.00        1106.76          34.50
      4263        95.4031        1241.00        1166.39          35.23
      4264        95.4239        1267.00        1235.52          35.59
      4265        95.4446        1405.00        1302.90          37.48
      4266        95.4654        1425.00        1353.64          37.75
      4267        95.4861        1481.00        1381.53          38.48
      4268        95.5069        1570.00        1390.66          39.62
      4269        95.5277        1639.00        1384.79          40.48
      4270        95.5484        1415.00        1364.07          37.62
      4271        95.5692        1479.00        1330.08          38.46
      4272        95.5900        1330.00        1288.39          36.47
      4273        95.6107        1348.00        1245.98          36.72
      4274        95.6315        1247.00        1209.10          35.31
      4275        95.6522        1255.00        1178.09          35.43
      4276        95.6730        1202.00        1155.91          34.67
      4277        95.6937        1247.00        1144.07          35.31
      4278        95.7145        1201.00        1143.49          34.66
      4279        95.7353        1150.00        1152.81          33.91
      4280        95.7560        1202.00        1166.70          34.67
      4281        95.7768        1233.00        1177.68          35.11
      4282        95.7975        1298.00        1181.45          36.03
      4283        95.8183        1244.00        1179.73          35.27
      4284        95.8391        1281.00        1174.47          35.79
      4285        95.8598        1219.00        1166.00          34.91
      4286        95.8806        1168.00        1155.14          34.18
      4287        95.9013        1151.00        1144.65          33.93
      4288        95.9221        1144.00        1137.92          33.82
      4289        95.9429        1176.00        1137.04          34.29
      4290        95.9636        1154.00        1141.10          33.97
      4291        95.9844        1165.00        1146.57          34.13
      4292        96.0051        1164.00        1146.82          34.12
      4293        96.0259        1094.00        1135.54          33.08
      4294        96.0467        1109.00        1112.10          33.30
      4295        96.0674        1053.00        1080.48          32.45
      4296        96.0882        1002.00        1046.99          31.65
      4297        96.1089         975.00        1016.10          31.23
      4298        96.1297        1003.00         990.34          31.67
      4299        96.1505         963.00         970.76          31.03
      4300        96.1712        1016.00         957.49          31.87
      4301        96.1920        1021.00         950.61          31.95
      4302        96.2127         972.00         949.67          31.18
      4303        96.2335         922.00         954.28          30.36
      4304        96.2543        1003.00         963.92          31.67
      4305        96.2750        1000.00         977.69          31.62
      4306        96.2958         996.00         993.92          31.56
      4307        96.3165         977.00        1009.71          31.26
      4308        96.3373         994.00        1021.99          31.53
      4309        96.3581        1042.00        1030.37          32.28
      4310        96.3788        1090.00        1037.12          33.02
      4311        96.3996        1031.00        1046.17          32.11
      4312        96.4203        1076.00        1060.69          32.80
      4313        96.4411        1049.00        1082.05          32.39
      4314        96.4619        1119.00        1108.51          33.45
      4315        96.4826        1072.00        1133.16          32.74
      4316        96.5034        1148.00        1145.25          33.88
      4317        96.5241        1098.00        1139.04          33.14
      4318        96.5449        1057.00        1121.06          32.51
      4319        96.5657        1056.00        1103.18          32.50
      4320        96.5864        1041.00        1093.46          32.26
      4321        96.6072        1091.00        1095.90          33.03
      4322        96.6279        1138.00        1112.60          33.73
      4323        96.6487        1070.00        1145.05          32.71
      4324        96.6695        1150.00        1194.54          33.91
      4325        96.6902        1144.00        1261.07          33.82
      4326        96.7110        1276.00        1342.23          35.72
      4327        96.7318        1334.00        1430.22          36.52
      4328        96.7525        1452.00        1514.70          38.11
      4329        96.7733        1592.00        1590.95          39.90
      4330        96.7940        1581.00        1664.81          39.76
      4331        96.8148        1608.00        1744.52          40.10
      4332        96.8355        1715.00        1834.22          41.41
      4333        96.8563        1742.00        1935.98          41.74
      4334        96.8771        1951.00        2047.58          44.17
      4335        96.8978        2240.00        2155.05          47.33
      4336        96.9186        2464.00        2232.54          49.64
      4337        96.9393        2607.00        2254.95          51.06
      4338        96.9601        2378.00        2213.18          48.76
      4339        96.9809        2119.00        2118.51          46.03
      4340        97.0016        1903.00        1994.55          43.62
      4341        97.0224        1654.00        1865.50          40.67
      4342        97.0431        1621.00        1747.96          40.26
      4343        97.0639        1461.00        1648.06          38.22
      4344        97.0847        1519.00        1567.09          38.97
      4345        97.1054        1502.00        1507.12          38.76
      4346        97.1262        1333.00        1471.95          36.51
      4347        97.1469        1379.00        1463.52          37.13
      4348        97.1677        1367.00        1479.98          36.97
      4349        97.1885        1491.00        1515.90          38.61
      4350        97.2092        1540.00        1561.47          39.24
      4351        97.2300        1687.00        1601.67          41.07
      4352        97.2507        1816.00        1619.75          42.61
      4353        97.2715        1786.00        1604.21          42.26
      4354        97.2923        1580.00        1554.08          39.75
      4355        97.3130        1453.00        1478.51          38.12
      4356        97.3338        1294.00        1391.31          35.97
      4357        97.3545        1316.00        1304.77          36.28
      4358        97.3753        1144.00        1227.02          33.82
      4359        97.3961        1185.00        1162.45          34.42
      4360        97.4168        1176.00        1111.74          34.29
      4361        97.4376        1101.00        1074.47          33.18
      4362        97.4583        1058.00        1049.14          32.53
      4363        97.4791        1062.00        1033.76          32.59
      4364        97.4999        1076.00        1026.08          32.80
      4365        97.5206        1046.00        1024.08          32.34
      4366        97.5414        1119.00        1025.79          33.45
      4367        97.5621        1075.00        1029.93          32.79
      4368        97.5829        1099.00        1036.20          33.15
      4369        97.6037        1077.00        1045.10          32.82
      4370        97.6244        1113.00        1058.26          33.36
      4371        97.6452        1106.00        1078.67          33.26
      4372        97.6659        1193.00        1110.20          34.54
      4373        97.6867        1174.00        1156.85          34.26
      4374        97.7075        1243.00        1222.35          35.26
      4375        97.7282        1276.00        1309.61          35.72
      4376        97.7490        1475.00        1418.70          38.41
      4377        97.7697        1524.00        1543.05          39.04
      4378        97.7905        1669.00        1663.19          40.85
      4379        97.8113        1853.00        1746.96          43.05
      4380        97.8320        1905.00        1766.49          43.65
      4381        97.8528        1990.00        1722.75          44.61
      4382        97.8736        1847.00        1639.17          42.98
      4383        97.8943        1616.00        1540.95          40.20
      4384        97.9151        1420.00        1445.37          37.68
      4385        97.9358        1294.00        1362.46          35.97
      4386        97.9566        1327.00        1298.15          36.43
      4387        97.9773        1234.00        1254.88          35.13
      4388        97.9981        1234.00        1233.90          35.13
      4389        98.0189        1143.00        1235.46          33.81
      4390        98.0396        1198.00        1259.06          34.61
      4391        98.0604        1294.00        1303.27          35.97
      4392        98.0811        1343.00        1365.27          36.65
      4393        98.1019        1390.00        1439.40          37.28
      4394        98.1227        1493.00        1513.28          38.64
      4395        98.1434        1634.00        1570.74          40.42
      4396        98.1642        1755.00        1599.35          41.89
      4397        98.1849        1717.00        1597.08          41.44
      4398        98.2057        1658.00        1566.69          40.72
      4399        98.2265        1584.00        1512.66          39.80
      4400        98.2472        1477.00        1443.91          38.43
      4401        98.2680        1351.00        1371.64          36.76
      4402        98.2887        1271.00        1303.97          35.65
      4403        98.3095        1203.00        1242.71          34.68
      4404        98.3303        1150.00        1190.43          33.91
      4405        98.3510        1167.00        1148.27          34.16
      4406        98.3718        1122.00        1116.46          33.50
      4407        98.3925        1045.00        1094.27          32.33
      4408        98.4133        1008.00        1080.59          31.75
      4409        98.4341        1042.00        1074.81          32.28
      4410        98.4548        1125.00        1075.38          33.54
      4411        98.4756        1097.00        1081.63          33.12
      4412        98.4963        1101.00        1091.36          33.18
      4413        98.5171        1087.00        1100.66          32.97
      4414        98.5379        1078.00        1104.67          32.83
      4415        98.5586        1124.00        1100.77          33.53
      4416        98.5794        1047.00        1090.51          32.36
      4417        98.6002        1050.00        1077.22          32.40
      4418        98.6209         998.00        1063.12          31.59
      4419        98.6417        1069.00        1048.84          32.70
      4420        98.6624        1042.00        1034.58          32.28
      4421        98.6832         949.00        1020.24          30.81
      4422        98.7039         997.00        1006.00          31.58
      4423        98.7247         942.00         992.08          30.69
      4424        98.7455         907.00         979.08          30.12
      4425        98.7662         850.00         967.56          29.15
      4426        98.7870         909.00         957.79          30.15
      4427        98.8077         944.00         949.81          30.72
      4428        98.8285         917.00         943.54          30.28
      4429        98.8493         923.00         938.90          30.38
      4430        98.8700         879.00         935.81          29.65
      4431        98.8908         941.00         934.16          30.68
      4432        98.9115         943.00         933.92          30.71
      4433        98.9323         970.00         934.77          31.14
      4434        98.9531         939.00         936.95          30.64
      4435        98.9738         947.00         939.07          30.77
      4436        98.9946        1002.00         941.40          31.65
      4437        99.0154         909.00         943.42          30.15
      4438        99.0361         878.00         945.09          29.63
      4439        99.0569         902.00         946.73          30.03
      4440        99.0776         932.00         949.03          30.53
      4441        99.0984         903.00         952.92          30.05
      4442        99.1191         979.00         959.40          31.29
      4443        99.1399         955.00         969.47          30.90
      4444        99.1607         977.00         984.07          31.26
      4445        99.1814         993.00        1004.22          31.51
      4446        99.2022        1018.00        1029.73          31.91
      4447        99.2229        1051.00        1060.35          32.42
      4448        99.2437        1084.00        1094.16          32.92
      4449        99.2645        1118.00        1126.53          33.44
      4450        99.2852        1173.00        1150.43          34.25
      4451        99.3060        1162.00        1159.03          34.09
      4452        99.3267        1250.00        1150.92          35.36
      4453        99.3475        1172.00        1130.62          34.23
      4454        99.3683        1151.00        1104.42          33.93
      4455        99.3890        1085.00        1077.79          32.94
      4456        99.4098        1065.00        1054.43          32.63
      4457        99.4305         956.00        1036.53          30.92
      4458        99.4513        1023.00        1024.80          31.98
      4459        99.4721         989.00        1018.71          31.45
      4460        99.4928         965.00        1016.08          31.06
      4461        99.5136        1038.00        1015.13          32.22
      4462        99.5343        1040.00        1016.35          32.25
      4463        99.5551         994.00        1019.13          31.53
      4464        99.5759        1046.00        1024.93          32.34
      4465        99.5966        1037.00        1032.43          32.20
      4466        99.6174        1028.00        1038.53          32.06
      4467        99.6381        1092.00        1039.73          33.05
      4468        99.6589        1049.00        1034.94          32.39
      4469        99.6797        1056.00        1026.13          32.50
      4470        99.7004        1091.00        1016.52          33.03
      4471        99.7212        1002.00        1009.01          31.65
      4472        99.7420         997.00        1006.01          31.58
      4473        99.7627        1005.00        1008.63          31.70
      4474        99.7835        1022.00        1016.93          31.97
      4475        99.8042        1045.00        1029.73          32.33
      4476        99.8250        1059.00        1043.94          32.54
      4477        99.8457        1126.00        1054.64          33.56
      4478        99.8665        1091.00        1057.19          33.03
      4479        99.8873        1061.00        1048.76          32.57

# 12. STRUCTURE-FACTOR LIST

loop_
 _refln_index_h
 _refln_index_k
 _refln_index_l
 _refln_F_squared_calc
 _refln_F_squared_meas
 _refln_F_squared_sigma
 _refln_observed_status
 _refln_d_spacing
   1   1   0      479.80      147.42       88.98 < 10.601570
   2   0   0    54742.99    53357.13     1095.06 o  7.684649
  -1   1   1    47289.64    46092.46      946.63 o  7.682292
   1   1   1      125.04      228.13       61.54 o  7.321917
   0   2   0       18.88       33.90        9.46 o  7.321418
   0   2   1       67.68        0.00        0.00 <  6.024002
   2   2   0     1225.36     1127.13       67.78 o  5.300785
   0   0   2     4617.46     4251.43      249.81 o  5.299616
   3   1   0     5221.91     5117.88      114.61 o  4.835675
  -2   2   1    11606.09    11351.04      254.90 o  4.834722
  -1   1   2    19889.24    19452.17      437.63 o  4.834057
   2   2   1   126149.70   124527.80     2505.73 o  4.652443
   1   3   0   146571.00   143881.92     2899.31 o  4.651990
   1   1   2   150632.72   148171.41     2986.25 o  4.651851
  -3   1   1   172896.30   180287.78     3662.39 o  4.512821
  -2   0   2   143925.48   149544.91     3034.01 o  4.511983
   3   1   1     2356.70     2278.56       84.71 o  4.294201
  -1   3   1     6001.08     5781.06      213.27 o  4.293177
   0   2   2      885.52      856.16       32.09 o  4.292967
   2   0   2    28350.24    28065.23      598.20 o  4.227407
   1   3   1    64048.02    63404.11     1356.38 o  4.227118
   4   0   0    24680.90    25729.53      630.83 o  3.842324
  -2   2   2    24130.21    25166.64      617.72 o  3.841146
  -3   1   2      997.51      740.26       42.07 o  3.695026
   2   2   2   224478.42   219999.75     4489.42 o  3.660959
   0   4   0   320552.38   312699.03     6399.05 o  3.660709
   3   3   0       53.99       25.69        7.79 o  3.533856
  -1   3   2      342.59      153.46       51.41 o  3.533225
   3   1   2   157935.73   152680.59     3112.83 o  3.460711
   1   3   2   109792.66   106139.43     2163.13 o  3.460176
   0   4   1   151993.86   145739.06     2981.13 o  3.460151
   4   2   0   127982.29   131904.73     2701.95 o  3.402258
  -3   3   1   120448.04   124139.58     2540.94 o  3.401798
  -1   1   3   153386.59   157764.38     3233.38 o  3.401181
   3   3   1      543.78      279.35       57.24 o  3.305163
   2   4   0     1620.93      782.63      168.29 o  3.304884
   1   1   3      825.97      413.80       80.28 o  3.304597
  -4   2   1        2.39        1.26        0.28 o  3.299167
  -4   0   2   345887.84   404387.59     8518.53 o  3.219049
   4   2   1    90255.50    88663.18     1823.17 o  3.182879
  -2   4   1   111759.91   109656.28     2267.44 o  3.182254
   0   2   3   179100.06   176000.23     3624.62 o  3.181957
   2   4   1       74.42       45.66       12.17 o  3.128571
   4   0   2    42903.36    43519.17      883.77 o  3.012708
   0   4   2    40408.08    41017.17      832.44 o  3.012001
   5   1   0   414869.56   413465.53     8373.61 o  3.008290
  -3   3   2   556516.44   555561.31    11260.02 o  3.007549
  -2   2   3   469368.91   468563.31     9495.17 o  3.007282
  -5   1   1      905.07      817.04       53.15 o  2.947195
  -4   2   2     4318.69     3868.58      265.17 o  2.946796
  -3   1   3      106.14       94.86        7.54 o  2.946462
   3   3   2    26465.98    25752.36      712.28 o  2.877082
   2   2   3    18715.02    18210.39      503.18 o  2.876849
   1   5   0     7345.11     7127.61      203.54 o  2.876807
   5   1   1    23042.51    22388.39      615.51 o  2.843558
  -2   4   2    25997.41    25211.30      693.71 o  2.842754
  -1   3   3     5220.25     5062.40      139.75 o  2.842603
   4   2   2    14006.18    12157.44      406.24 o  2.786052
  -1   5   1     2835.68     2432.70       90.02 o  2.785550
   1   3   3     1411.18     1222.22       39.19 o  2.785490
   3   1   3   215865.73   210337.06     4324.42 o  2.767478
   2   4   2   245230.19   238949.52     4906.48 o  2.767344
   1   5   1   236755.03   230937.23     4763.73 o  2.767263
  -5   1   2        3.82        3.86        2.43 <  2.696215
   4   4   0    21318.22    20012.71      873.75 o  2.650393
   0   0   4     5521.57     5178.47      235.91 o  2.649808
   5   3   0   140274.19   140701.27     2911.62 o  2.601039
  -4   4   1   196985.14   198857.98     4136.97 o  2.600777
  -1   1   4   193970.17   195833.03     4076.65 o  2.600260
   6   0   0    90337.45    90329.07     2146.13 o  2.561550
  -5   3   1       10.70       10.74        1.25 o  2.561245
  -3   3   3    62756.89    63095.71     1527.39 o  2.560764
  -2   0   4    10495.06    10710.48      272.87 o  2.560588
   5   1   2      315.96      281.62        9.86 o  2.542880
   4   4   1     3434.10     3060.03      108.05 o  2.542657
   3   5   0    14189.14    12834.90      475.22 o  2.542477
  -1   5   2      427.31      386.52       14.18 o  2.542242
   0   4   3      746.60      665.27       23.57 o  2.542187
   1   1   4    17255.59    15375.99      545.86 o  2.542174
  -4   2   3      100.50       92.68        9.35 o  2.529840
   1   5   2       11.82        8.18        7.14 <  2.514619
   5   3   1      640.30      491.18       21.74 o  2.492344
  -3   5   1    17518.02    13592.22      601.53 o  2.491944
   0   2   4    14549.40    11181.60      472.67 o  2.491638
   3   5   1    16987.83    19354.13      574.99 o  2.453198
   2   0   4    74691.15    85095.16     2482.52 o  2.453002
  -2   4   3     3601.03     4071.02      115.63 o  2.450417
   3   3   3    78053.32    68717.44     1688.86 o  2.440639
   0   6   0    60453.14    53333.65     1393.76 o  2.440473
   6   2   0    35932.77    32623.29      809.78 o  2.417837
  -4   4   2    48577.81    44146.75     1097.82 o  2.417361
  -2   2   4    34352.25    31389.46      798.32 o  2.417029
  -6   2   1     5750.85     3866.98      501.31 o  2.391597
  -5   3   2     3050.22     2098.14      269.37 o  2.391340
  -3   1   4       37.44       24.27        3.91 o  2.390929
   4   2   3      591.37      556.40       55.76 o  2.378556
   2   4   3       18.73       17.62        3.36 o  2.378295
   0   6   1        1.47        1.33        3.54 o  2.378245
  -6   0   2     3708.99     3805.38      187.44 o  2.371864
  -5   1   3    23390.74    23997.36     1208.68 o  2.371603
   4   4   2       16.97       13.00        1.15 o  2.326222
   2   6   0    10505.18     8176.25      549.32 o  2.325995
   2   2   4     6706.18     5145.21      318.35 o  2.325926
   6   2   1      210.89      161.72       14.86 o  2.324405
  -3   5   2      746.74      564.94       40.49 o  2.323844
  -1   3   4     5128.47     3944.21      231.56 o  2.323630
   5   3   2     2267.15     2255.50       69.05 o  2.282411
  -2   6   1    23870.70    23672.43      776.82 o  2.282020
   1   3   4    38283.35    38066.69     1178.62 o  2.281900
   3   5   2    37925.80    36953.35     1090.03 o  2.262059
   3   1   4    27585.73    26878.40      790.42 o  2.262011
   2   6   1    11842.83    11524.56      352.63 o  2.261977
  -6   2   2     5100.63     5088.57      152.64 o  2.256411
  -4   0   4     1238.61     1237.79       43.63 o  2.255992
   6   0   2    36645.57    33810.23     1137.60 o  2.245846
  -1   5   3    39057.07    35879.80     1215.56 o  2.245186
   5   1   3    36702.10    33321.18     1026.79 o  2.217147
   0   6   2    26934.66    24401.53      780.69 o  2.216725
   1   5   3    13378.00    12145.65      375.18 o  2.216724
   7   1   0     4062.48     2666.71      886.68 o  2.171340
  -4   4   3      130.97       81.07       32.77 <  2.170762
  -3   3   4      164.73       99.74       39.11 <  2.170622
  -7   1   1    14519.94    12275.87      523.47 o  2.156547
  -5   3   3    25695.42    21724.61      933.25 o  2.156131
  -4   2   4     6550.30     5576.30      247.53 o  2.155961
   6   2   2        5.37        4.90        0.43 o  2.147100
  -2   6   2     3166.67     3015.68      369.85 o  2.146589
   0   4   4      305.74      278.90       22.03 o  2.146484
   5   5   0       40.31       34.09        1.62 o  2.120314
   4   0   4   275143.28   270351.56     5897.41 o  2.113703
   2   6   2   269144.62   265172.50     5794.75 o  2.113559
   7   1   1       40.54       39.58        4.24 o  2.098949
   6   4   0    14720.54    14369.77      595.18 o  2.098758
  -5   5   1    10626.94    10141.97      436.99 o  2.098591
  -3   5   3      279.84      266.36       17.95 o  2.098326
  -2   4   4      608.40      579.11       30.22 o  2.098229
  -1   1   5     1495.68     1426.49       78.00 o  2.098155
  -6   4   1     1449.88     1345.95       56.64 o  2.081527
   4   4   3   157838.09   149110.61     3161.03 o  2.072912
   3   3   4   220152.06   208954.34     4415.11 o  2.072790
   1   7   0   201918.25   192484.94     4124.30 o  2.072724
   5   5   1   280105.88   285243.38     5958.55 o  2.060184
   4   6   0   172856.81   176171.72     3691.63 o  2.060060
   1   1   5   263333.47   268163.31     5595.96 o  2.059772
  -7   1   2    23997.59    24307.67      502.38 o  2.059585
  -6   2   3    23479.96    23852.00      494.27 o  2.059386
  -5   1   4    20905.15    21384.49      444.87 o  2.059210
   5   3   3    10540.17    10445.62      227.71 o  2.038104
  -1   7   1    32580.62    32137.14      711.62 o  2.037799
   2   4   4     6881.80     6815.80      147.79 o  2.037796
   6   4   1   125290.03   124027.02     2700.68 o  2.036774
  -4   6   1   107147.80   106946.20     2367.26 o  2.036501
   0   2   5   136784.67   135868.28     2983.43 o  2.036212
   4   2   4    28013.49    28141.13      633.08 o  2.030766
   3   5   3    11219.67    11270.79      253.79 o  2.030692
   1   7   1    15939.34    15702.96      365.93 o  2.030607
   4   6   1     4482.98     3263.06      720.79 o  2.008232
   0   6   3      209.55      152.52       33.64 o  2.008000
   7   3   0     6686.36     2533.00      525.28 o  2.002352
  -5   5   2     6546.53     2249.51      548.24 o  2.002030
  -2   2   5      662.69      212.94       59.34 o  2.001699
  -7   3   1     2888.00     2500.38      309.53 o  1.990734
  -6   4   2      838.71      745.25       96.21 o  1.990560
  -3   1   5    10041.07     8714.59     1112.82 o  1.990158
   7   1   2     7802.28     7183.66      428.66 o  1.962408
  -2   6   3    11736.29    10828.91      641.15 o  1.961846
  -1   5   4    17942.08    16554.92      981.14 o  1.961791
   7   3   1    12671.49    13975.79      703.03 o  1.945158
  -4   6   2    11577.52    12735.41      381.42 o  1.944758
  -1   3   5    12225.46    13448.14      403.03 o  1.944527
   6   2   3    10619.93    10347.80      323.71 o  1.936912
   5   5   2    20887.84    20389.72      632.02 o  1.936795
   3   7   0     9941.47     9737.18      315.12 o  1.936617
  -1   7   2    24650.06    24272.21      794.96 o  1.936513
   2   2   5    11391.65    11119.98      342.65 o  1.936496
   1   5   4    19248.97    18789.93      576.89 o  1.936483
   5   1   4     1316.96     1390.96       70.30 o  1.924467
   2   6   3    10873.14    11484.18      586.46 o  1.924243
   1   7   2    10263.30    10749.78      605.74 o  1.924220
   8   0   0        0.65        0.68        0.21 o  1.921162
  -4   4   4     8687.58     9208.05      411.66 o  1.920573
   6   4   2    72080.77    66950.11     1515.69 o  1.914302
  -3   7   1    98048.22    92084.23     2156.41 o  1.914003
   1   3   5    56834.12    52820.60     1196.08 o  1.913854
  -7   3   2       47.78       44.43        1.01 o  1.913704
  -5   3   4      230.68      214.19        4.71 o  1.913403
  -7   1   3   291616.22   286719.88     6160.78 o  1.909466
  -6   0   4   347672.81   343899.28     7466.34 o  1.909303
   4   6   2    10219.17     8342.39      605.96 o  1.896348
   3   7   1      957.34      796.93       63.36 o  1.896278
   3   1   5     2386.61     1961.85      140.61 o  1.896221
  -3   5   4     4133.82     5272.50      615.62 o  1.867074
   8   2   0     8937.79    12947.95      391.60 o  1.858252
  -5   5   3     5833.20     9260.52      321.58 o  1.857828
  -3   3   5      403.09      639.93       24.55 o  1.857626
  -8   2   1   338654.03   339447.03     7147.63 o  1.851661
  -6   4   3   214217.42   215307.27     4552.12 o  1.851356
  -4   2   5   286284.38   286291.34     6064.17 o  1.851116
  -8   0   2    66407.41    66463.81     1396.96 o  1.847825
  -6   2   4    80449.23    81753.34     1749.10 o  1.847513
   7   3   2   248381.08   261722.33     5531.24 o  1.834999
  -3   7   2   384237.44   406541.41     8647.76 o  1.834599
   0   4   5   256202.03   270958.31     5739.47 o  1.834465
   4   4   4    22381.91    22883.20      481.83 o  1.830479
   0   8   0     1693.52     1776.35       37.86 o  1.830354
   8   2   1     9333.84     6179.61      517.14 o  1.809730
  -4   6   3     2881.57     1899.58      162.90 o  1.809254
  -2   4   5     7483.89     4933.50      422.62 o  1.809106
   5   3   4    61394.28    52620.06     1757.66 o  1.803865
   3   7   2      650.15      554.48       19.08 o  1.803738
   3   5   4     1667.37     1429.08       47.61 o  1.803714
   0   8   1    36674.97    31457.64     1115.53 o  1.803659
   7   1   3    13879.92    13386.36      366.97 o  1.795597
  -1   7   3      578.14      559.50       16.87 o  1.795148
   0   6   4    29403.64    28084.05      712.91 o  1.795125
  -8   2   2   144392.39   143091.56     3240.76 o  1.791643
  -7   3   3   148222.33   146933.58     3334.44 o  1.791493
  -5   1   5   115005.16   115523.81     2650.22 o  1.791239
   6   0   4    75346.78    67810.25     2492.50 o  1.780806
   5   5   3     3562.77     3220.74      116.50 o  1.780719
   2   8   0     6930.16     6350.39      241.87 o  1.780545
   3   3   5    17429.27    15756.08      565.96 o  1.780542
   1   7   3    15518.89    14083.61      527.77 o  1.780500
   8   0   2   122330.91   112601.38     2963.25 o  1.767170
   6   6   0    67894.42    62712.91     1649.84 o  1.766928
  -2   6   4    58686.93    54155.61     1409.63 o  1.766612
   0   0   6    94321.66    87038.92     2272.57 o  1.766539
   6   4   3     5215.15     4854.59      129.32 o  1.760853
  -2   8   1    31449.28    29430.35      802.17 o  1.760586
   2   4   5    75620.47    70771.36     1874.58 o  1.760540
   7   5   0     3453.48     3570.30      114.20 o  1.756725
  -6   6   1      788.09      830.37       29.08 o  1.756609
  -1   1   6     2099.27     2334.55       85.78 o  1.756237
   4   6   3    48477.31    50978.24     1199.38 o  1.751422
   4   2   5     4009.07     4215.90       99.00 o  1.751392
   2   8   1     9040.14     9444.04      232.28 o  1.751333
  -7   5   1   208992.73   207311.86     4758.49 o  1.748863
  -2   0   6   330062.81   326433.00     7621.97 o  1.748410
  -7   1   4      147.29      134.06        7.87 o  1.739207
   6   2   4    35037.10    33772.72      775.63 o  1.730356
   2   6   4     6642.04     6402.35      145.70 o  1.730088
   0   8   2     9184.83     8895.87      204.58 o  1.730076
   6   6   1   164720.30   160011.25     3685.63 o  1.729462
   5   7   0   182192.67   176984.16     4072.31 o  1.729372
   1   1   6    80714.15    78639.08     1816.69 o  1.729107
   8   2   2     6462.10     6257.98      290.20 o  1.717838
   7   5   1     3168.84     3068.75      142.18 o  1.717721
  -5   7   1     3025.94     2932.66      139.89 o  1.717524
  -3   7   3    25007.04    24538.44     1178.34 o  1.717379
  -1   5   5    18771.84    18420.08      884.15 o  1.717286
   0   2   6     2688.16     2637.78      125.33 o  1.717258
   8   4   0     2948.49     2655.20      143.95 o  1.701129
  -6   6   2      263.20      236.50       11.89 o  1.700899
  -2   2   6        6.28        5.62        0.43 o  1.700590
   7   3   3    97730.99    99853.64     2375.45 o  1.696455
   5   7   1    15753.09    16298.96      390.45 o  1.696279
   9   1   0        7.17        7.28        0.26 o  1.696204
  -2   8   2    57901.87    59942.38     1441.05 o  1.696108
  -8   4   1    27045.04    27458.50      646.53 o  1.696068
   2   0   6    25370.70    25986.48      614.00 o  1.696054
   1   5   5   146866.36   150430.98     3580.59 o  1.696049
  -7   5   2    24811.51    25246.73      593.19 o  1.695945
  -5   5   4      569.03      583.05       13.86 o  1.695735
  -4   4   5      708.92      726.39       17.75 o  1.695649
  -3   1   6     9451.95     9718.43      231.13 o  1.695575
  -9   1   1      448.93      457.34       10.11 o  1.693257
  -6   4   4    27224.38    26440.89      662.83 o  1.692879
  -5   3   5       40.36       39.20        1.45 o  1.692777
  -8   2   3     3684.44     3603.31       87.73 o  1.692248
   5   1   5    30726.88    27925.16      858.63 o  1.679799
   3   7   3    17542.96    15943.37      490.45 o  1.679703
   2   8   2   123680.62   112377.16     3526.30 o  1.679673
   8   4   1    18491.18    11820.56     1139.16 o  1.663668
  -5   7   2       20.81       12.92        1.58 o  1.663373
  -1   3   6      852.63      543.78       53.47 o  1.663144
   9   1   1    66054.41    78482.99     1925.94 o  1.657113
  -4   6   4    68273.02    81216.43     1996.05 o  1.656611
  -3   5   5   167535.25   199297.12     4905.82 o  1.656546
   6   6   2    49991.32    53766.51     1239.15 o  1.652582
   4   8   0    49579.12    53716.21     1268.61 o  1.652442
   2   2   6    47143.32    50667.82     1172.22 o  1.652298
  -8   4   2   207897.66   222956.88     5063.70 o  1.649584
  -4   0   6   142074.91   149789.39     3531.64 o  1.649186
  -9   1   2    23099.74    24712.09      548.73 o  1.648909
  -7   3   4    13428.78    14051.91      320.96 o  1.648659
  -6   2   5    20523.15    21515.38      496.72 o  1.648551
   7   5   2     2285.38     2143.89      102.65 o  1.640440
  -4   8   1     8231.32     7342.96      409.81 o  1.640209
  -1   7   4     1036.39      922.91       51.35 o  1.640079
   1   3   6    34762.67    30956.42     1715.33 o  1.640048
   7   1   4     3832.77     4484.91      162.05 o  1.625538
   5   7   2     6195.21     7249.30      262.13 o  1.625389
   4   8   1    25306.44    29612.24     1074.01 o  1.625331
   3   1   6    52777.34    61771.91     2210.28 o  1.625231
   0   8   3    21193.25    24799.21      901.72 o  1.625208
   1   7   4    13088.50    15319.10      545.76 o  1.625205
   5   5   4     7886.17     8632.10      449.66 o  1.618083
   4   4   5      908.95      956.63       57.27 o  1.618008
   1   9   0     1423.55     1473.45      114.84 o  1.617942
   9   3   0    64872.88    67620.73     1867.08 o  1.611892
  -6   6   3   124985.51   130359.66     3608.70 o  1.611574
  -3   3   6    27514.18    28662.26      791.63 o  1.611352
  -8   0   4    26813.04    28643.75      747.68 o  1.609524
  -9   3   1    16043.07    17138.44      447.08 o  1.609362
  -7   5   3       73.95       82.31        3.96 o  1.609135
  -4   2   6     5414.94     6388.50      181.55 o  1.608874
   6   4   4     4076.74     3871.30       89.96 o  1.601377
   3   5   5     1613.80     1532.47       34.87 o  1.601185
  -1   9   1     3549.56     3365.92       78.46 o  1.601166
   8   2   3   159218.69   150701.75     3476.82 o  1.600843
  -2   8   3   193860.38   183478.89     4244.65 o  1.600445
   0   6   5   216448.14   205531.86     4706.03 o  1.600396
   5   3   5    14787.91    13755.25      314.42 o  1.597794
   4   6   4    17200.57    16187.71      360.72 o  1.597747
   1   9   1     3532.39     3265.98       76.81 o  1.597670
   8   4   2    81431.55    82146.56     2366.20 o  1.591440
  -4   8   2    57978.63    58697.63     1737.31 o  1.591127
   0   4   6    55485.36    55918.46     1612.10 o  1.590978
   9   1   2       20.53       18.03        2.39 o  1.583998
  -3   7   4     4312.23     3632.93      332.53 o  1.583519
  -2   6   5    10830.72     9124.56      831.13 o  1.583475
   2   8   3     3202.89     3134.09      296.44 o  1.579832
   9   3   1     2878.25     2865.17      243.09 o  1.578233
  -5   7   3     9370.41     9523.59      837.12 o  1.577866
  -2   4   6    12846.11    12559.69     1105.75 o  1.577696
  -9   1   3      130.14      130.59        7.41 o  1.572103
  -8   2   4        8.86        8.87        0.64 o  1.571987
  -7   1   5      135.32      138.72        8.74 o  1.571880
  -9   3   2    24147.47    23410.68     1329.13 o  1.571141
  -8   4   3    21710.45    20897.86     1199.41 o  1.571028
  -5   1   6    15874.78    15824.33      940.44 o  1.570747
   4   8   2    41321.12    42452.34     1764.22 o  1.564285
   4   0   6   116894.91   120095.05     5011.85 o  1.564243
   7   3   4    20342.67    21229.89      772.96 o  1.550884
   6   6   3    13562.80    14154.32      517.67 o  1.550815
   3   9   0     3170.47     3356.62      126.75 o  1.550663
   3   3   6     2373.34     2478.35       90.17 o  1.550617
  -1   9   2    23968.39    25375.70      948.51 o  1.550610
   2   6   5    56011.77    57743.81     2039.15 o  1.550601
   6   2   5   204558.98   212545.64     5032.25 o  1.544459
   3   7   4   155633.14   161709.58     3827.89 o  1.544310
   1   9   2    97458.45   100811.59     2410.26 o  1.544277
   7   5   3     1726.02     2119.78       49.41 o  1.539207
  -3   9   1    10039.60    12193.25      277.93 o  1.538981
   2   4   6      563.30      693.42       17.60 o  1.538908
  10   0   0   488339.84   580128.44    12822.08 o  1.536930
  -5   5   5   481496.66   570182.19    12707.08 o  1.536458
  -6   4   5     2036.20     2388.69       53.14 o  1.535878
   5   7   3    14757.45    14515.30      475.26 o  1.529804
   3   9   1       95.25       83.83        3.56 o  1.529721
   4   2   6     3513.20     3455.55      115.22 o  1.529719
   9   3   2     7066.20     5727.68      852.79 o  1.514685
   7   7   0     6184.07     5120.54      720.09 o  1.514510
  -4   8   3     6675.65     5544.50      787.40 o  1.514314
  -1   5   6      177.38      147.33       21.67 o  1.514197
   8   6   0     6605.75     6401.61      358.39 o  1.509548
  -7   7   1     6799.40     6744.92      337.67 o  1.509464
  -1   1   7    34371.66    34070.05     1705.97 o  1.509140
   8   0   4    77653.20    77055.88     2589.27 o  1.506354
  -8   6   1     3247.16     3258.74      105.86 o  1.506009
   0   8   4    58742.26    58951.75     1916.18 o  1.506000
  -4   6   5     4520.90     4587.65      143.47 o  1.505715
 -10   0   2    14900.73    15055.23      440.05 o  1.504384
  -9   3   3    15251.63    15528.71      463.19 o  1.504274
  10   2   0     2221.87     2258.71       68.24 o  1.504145
  -7   3   5    10986.04    11235.91      341.85 o  1.504079
  -6   0   6    10996.08    11246.17      344.05 o  1.503994
  -6   6   4      465.16      469.23       15.04 o  1.503774
  -4   4   6     4616.04     4656.45      144.63 o  1.503641
 -10   2   1    54544.79    54802.34     1630.90 o  1.503539
  -7   5   4     8987.95     9009.98      287.16 o  1.503242
  -5   3   6    14234.73    14269.62      453.32 o  1.503086
   8   4   3    34405.19    29751.71     1541.16 o  1.497079
  -3   9   2     2385.30     2018.62      110.55 o  1.496786
   1   5   6    29794.88    25415.42     1375.88 o  1.496706
   9   1   3    49353.67    40412.32     1574.11 o  1.489465
   7   7   1    10599.85     8667.91      337.57 o  1.489303
   6   8   0    63045.61    51554.83     2013.02 o  1.489235
  -2   8   4    22220.21    18286.82      698.52 o  1.489046
  -1   7   5     1285.41     1057.87       40.90 o  1.489019
   1   1   7     6062.11     4989.00      190.96 o  1.488992
   8   6   1     1896.01     1744.46       66.15 o  1.483188
  -6   8   1      289.84      267.81       10.94 o  1.483041
   0   2   7    13417.62    12756.29      438.48 o  1.482797
   5   1   6    84206.96    78729.09     2169.55 o  1.479932
   4   8   3   135904.19   127063.27     3501.60 o  1.479915
   3   9   2    56025.70    52381.07     1436.29 o  1.479884
  -9   1   4     1922.15     1947.72       43.70 o  1.475656
   8   2   4    56001.41    56715.06     1259.16 o  1.475448
  10   2   1    49600.07    50232.15     1115.33 o  1.475311
   9   5   0     4018.15     4084.10       89.62 o  1.475213
  -1   9   3    80758.82    81828.33     1814.69 o  1.475129
   1   7   5    55697.80    56435.42     1249.82 o  1.475111
  -7   7   2    10702.25    10883.29      240.34 o  1.475043
  -5   7   4    43149.07    43879.01      965.65 o  1.474905
  -3   5   6    25141.82    25567.13      563.69 o  1.474800
  -2   2   7    18085.73    18383.77      404.57 o  1.474760
 -10   2   2    11294.30    11337.55      247.20 o  1.473598
  -8   4   4     8291.84     8316.40      182.60 o  1.473398
  -9   5   1   220521.33   220985.67     4802.28 o  1.473274
  -6   2   6     8430.35     8491.74      186.61 o  1.473231
  -8   6   2   238904.64   240644.44     5257.84 o  1.473182
  -3   1   7   203516.58   205011.72     4503.78 o  1.472849
   7   1   5     3231.23     3046.14       72.68 o  1.467197
   2   8   4    17045.43    16069.03      378.52 o  1.466977
   1   9   3     1441.26     1358.71       32.24 o  1.466969
   6   8   1      559.92      519.69       11.97 o  1.466595
   5   5   5   518697.62   454246.44    10220.03 o  1.464383
   0  10   0   670795.19   585217.56    13266.25 o  1.464284
   6   4   5     1182.01     1132.13       43.69 o  1.450660
   4   6   5     9993.72     9569.24      357.35 o  1.450561
   0  10   1     4937.81     4819.29      191.08 o  1.450507
  10   0   2       27.27       25.68        1.38 o  1.449371
   9   5   1    49937.69    47017.30     1702.35 o  1.449280
  -6   8   2    47701.48    45220.81     1612.03 o  1.449056
  -3   7   5     5092.24     4829.78      177.56 o  1.448901
  -1   3   7    56647.92    53728.25     1922.81 o  1.448836
  -8   2   5     1290.06     1254.02       49.03 o  1.446473
  -9   5   2       94.44      110.34        4.89 o  1.443783
   6   6   4    62376.95    59993.95     1364.89 o  1.438541
   4   4   6    34304.08    32931.29      748.02 o  1.438424
   2  10   0    52191.87    50036.30     1142.57 o  1.438404
   7   7   2   241405.70   231362.84     5212.16 o  1.438087
   5   9   0   296939.53   284586.47     6429.09 o  1.437976
   2   2   7   208333.30   200322.33     4490.97 o  1.437824
   9   3   3    30092.84    30714.03      916.80 o  1.431400
   8   6   2     5207.13     5326.61      159.59 o  1.431325
  -5   9   1       78.91       83.94        3.00 o  1.431143
  -3   9   3    10187.19    11362.87      385.60 o  1.431059
   0   6   6    65100.97    69255.23     2220.66 o  1.430989
   1   3   7       29.66       31.68        1.22 o  1.430981
   7   5   4     1508.62     1637.82       65.85 o  1.428016
  -2  10   1     7166.71     7862.56      347.40 o  1.427819
   3   5   6     1807.31     1947.71       81.16 o  1.427808
   5   7   4   193983.23   196100.48     4952.32 o  1.422953
   5   3   6   125851.78   127225.42     3207.96 o  1.422934
   2  10   1    79973.31    80205.16     2063.42 o  1.422871
  10   2   2    11026.38    11544.73      285.21 o  1.421779
  -4   8   4     2076.10     2203.50       51.49 o  1.421377
  -2   6   6      652.86      703.12       16.16 o  1.421301
 -10   2   3    72963.46    81170.88     1845.96 o  1.419226
  -9   3   4    49650.98    56057.17     1279.05 o  1.419131
  -7   1   6    97610.63   110854.75     2546.22 o  1.418963
   6   8   2     3807.84     4324.51      100.45 o  1.418829
   5   9   1    78385.97    89021.64     2059.02 o  1.418782
   3   1   7    69335.76    78794.38     1828.77 o  1.418660
  10   4   0    27064.81    30921.04      700.59 o  1.417100
  -7   7   3    41263.75    47149.25     1086.50 o  1.416857
  -3   3   7    43992.26    50085.13     1173.96 o  1.416634
 -10   4   1    53193.18    60508.77     1387.04 o  1.416594
  -8   6   3    41162.63    46680.13     1094.10 o  1.416420
  -4   2   7    24020.26    26858.55      656.95 o  1.416161
   7   3   5     2460.36     2544.91       95.76 o  1.411602
   3   7   5       67.02       68.43        3.25 o  1.411421
   0  10   2     2210.65     2260.74       97.03 o  1.411400
   6   0   6    19429.92    17798.49      999.88 o  1.409136
   3   9   3    62145.35    57082.67     3121.52 o  1.409040
   9   5   2     2881.53     3423.07      397.53 o  1.399607
  -5   9   2     5856.88     6980.62      821.62 o  1.399358
   0   4   7     3515.54     4224.32      460.40 o  1.399205
   8   4   4    88540.27    83383.87     2042.09 o  1.393026
  10   4   1   112373.43   105850.00     2575.40 o  1.392910
  -2  10   2    55482.27    52241.70     1275.41 o  1.392775
   2   6   6    45527.39    42884.46     1040.12 o  1.392745
  -6   8   3   173340.62   163250.06     3983.23 o  1.392623
  -2   4   7   140047.38   132625.11     3199.33 o  1.392446
 -11   1   1     1853.07     1798.62       41.84 o  1.391562
 -10   4   2     2244.85     2180.12       50.83 o  1.391468
  -9   5   3        9.37        9.07        0.21 o  1.391380
  -7   5   5     4071.29     3943.36       93.23 o  1.391226
  -6   4   6     5349.43     5181.34      121.99 o  1.391159
  -5   1   7     2381.10     2316.53       54.95 o  1.391099
  11   1   0     1148.52     1111.27       25.50 o  1.390891
  -6   6   5        0.76        0.74        0.07 o  1.390499
  -5   5   6     4031.28     3900.49       94.74 o  1.390441
   9   1   4   135761.33   121200.40     3170.12 o  1.385747
  -1   9   4   148417.61   131110.83     3433.44 o  1.385403
   0   8   5    99878.39    88231.71     2307.00 o  1.385391
   6   2   6    17448.88    15342.95      397.05 o  1.383739
   4   8   4    34100.78    29985.10      781.35 o  1.383672
   2  10   2    36676.46    31683.18      844.54 o  1.383631
   5   9   2      336.22      351.50       38.35 o  1.376515
   1   9   4     6235.73     7008.57      794.56 o  1.376403
  -2   8   5      148.26      187.35       14.07 o  1.374371
 -10   0   4    84547.22    99038.81     3293.57 o  1.371559
  -9   1   5    87267.16   103951.30     3724.95 o  1.371472
 -11   1   2    59078.41    66153.04     1820.12 o  1.368817
  -8   4   5    85931.62    95745.34     2730.85 o  1.368562
  -7   3   6    55794.30    61770.89     1740.71 o  1.368490
   7   7   3    24448.63    26844.18      767.69 o  1.368420
   4  10   0    24706.87    27295.54      787.50 o  1.368291
   3   3   7      199.50      219.05        6.88 o  1.368219
  11   1   1    11264.52    12251.38      342.48 o  1.366905
  -5   7   5      147.75      160.79        5.57 o  1.366488
  -4   6   6    28152.47    30637.67      897.19 o  1.366441
   8   6   3     2422.88     2603.15      250.79 o  1.361510
  -4  10   1     4190.32     4605.21      503.96 o  1.361321
   2   4   7     4388.45     4734.52      453.11 o  1.361230
   8   2   5    13929.40    13171.26      817.85 o  1.352951
   6   8   3    10875.43    10263.56      634.00 o  1.352853
   4  10   1    21117.71    19929.59     1240.44 o  1.352779
   4   2   7    28651.11    27039.14     1672.65 o  1.352738
   2   8   5    13863.91    13083.89      809.41 o  1.352711
   0  10   3     3348.35     3159.97      196.45 o  1.352709
  10   2   3     9673.27     9162.81      496.29 o  1.351174
  -3   9   4      253.90      230.25       12.92 o  1.350805
  -1   7   6      748.00      678.32       41.15 o  1.350756
 -10   2   4    14344.38    10883.99      657.97 o  1.348107
  -8   0   6    49878.09    37218.68     2389.87 o  1.347948
  10   4   2     7080.83     5128.75      334.03 o  1.347592
  -5   9   3    18410.18    13096.84      876.98 o  1.347291
  -1   5   7    12538.64     8919.87      599.14 o  1.347162
 -10   4   3      258.60      219.36       12.25 o  1.345417
 -11   3   1     3525.92     3423.16      194.98 o  1.343861
  -8   6   4     3964.42     3996.93      229.19 o  1.343625
  -5   3   7    13179.38    13114.08      773.07 o  1.343444
  11   3   0    22495.84    22751.97     1266.98 o  1.343257
  -7   7   4    16590.40    16946.56      943.99 o  1.342961
  -4   4   7    10918.15    11152.54      622.56 o  1.342805
   9   3   4    39919.89    31759.14     2214.87 o  1.338622
  -2  10   3     1096.69      853.72       63.04 o  1.338329
   1   7   6    10744.24     8532.47      588.10 o  1.338295
   9   5   3   153118.77   142527.17     4061.45 o  1.333111
  -4  10   2   143812.55   135046.22     3863.02 o  1.332866
   1   5   7    91891.81    86241.12     2440.25 o  1.332772
   7   1   6    14642.44    14444.07      413.31 o  1.326354
   6   6   5    10204.07    10019.84      281.40 o  1.326314
   5   5   6       33.36       32.76        0.96 o  1.326263
   3   9   4    12119.73    11882.57      331.80 o  1.326219
   2  10   3     2722.70     2669.42       73.98 o  1.326206
   1  11   0       60.08       59.17        1.90 o  1.326202
 -11   1   3    89381.38    89902.43     2261.47 o  1.325904
  -9   3   5    65152.48    63850.10     1699.21 o  1.325740
  -8   2   6    39267.70    38482.75     1023.52 o  1.325667
   8   8   0    10008.67    10403.01      256.02 o  1.325196
   0   0   8    12641.67    13151.41      327.21 o  1.324904
 -11   3   2    38012.20    39186.46      883.59 o  1.323342
  -9   5   4    17712.13    18626.56      427.40 o  1.323183
  11   1   2   111705.44   116554.69     2647.23 o  1.323010
  -6   2   7    46953.88    48976.66     1119.58 o  1.322988
   9   7   0    86082.46    89149.48     2017.19 o  1.322864
  -8   8   1   159778.30   165471.02     3750.74 o  1.322799
  -4   8   5    84299.81    87303.32     1969.19 o  1.322601
  -3   7   6    79385.61    81776.80     1841.07 o  1.322566
  -1   1   8    75961.06    78810.59     1784.01 o  1.322513
  11   3   1    86686.11    91075.85     2036.20 o  1.321614
  -9   7   1       85.85       90.60        2.03 o  1.321465
  -6   8   4    28494.03    30072.58      671.83 o  1.321285
  -3   5   7    94513.97   100200.27     2256.04 o  1.321158
  -2   0   8    15531.71    16481.26      374.77 o  1.321127
   7   5   5    93331.41    84609.97     2302.53 o  1.317074
   5   9   3     9392.84     8515.12      233.11 o  1.316998
   4  10   2     9800.77     8884.93      242.65 o  1.316969
   5   1   7     1050.64      952.46       26.83 o  1.316966
   4   6   6    11869.20    10757.76      292.99 o  1.316943
  -1  11   1    57964.11    50659.26     1439.46 o  1.316916
   6   4   6    49719.82    40312.67     1345.31 o  1.315070
   5   7   5     6010.53     4878.95      162.29 o  1.315038
   1  11   1     7057.17     5572.66      198.54 o  1.314968
   8   8   1        0.96        1.01        0.18 o  1.307255
   7   9   0       60.62       64.28        9.76 o  1.307202
   1   1   8     6940.05     6576.60      924.11 o  1.306979
   9   7   1     4340.55     4045.95      256.46 o  1.304067
  -7   9   1    29054.98    27083.01     1731.23 o  1.303953
   0   2   8    57267.00    53816.44     3326.19 o  1.303729
  10   6   0    15061.30    16415.49      738.38 o  1.300520
  -8   8   2    66091.41    72033.84     3254.86 o  1.300389
  -2   2   8    26881.58    29571.74     1336.57 o  1.300130
 -10   6   1     3171.46     3488.84      164.62 o  1.300128
  -9   7   2      191.78      210.97        9.10 o  1.300058
  -3   1   8     2116.73     2340.92      108.01 o  1.299757
  10   0   4    16439.36    15441.21     1618.68 o  1.291057
   7   9   1     7691.85     7064.30      667.95 o  1.290890
  -1   9   5        0.59        0.54        0.59 o  1.290706
   2   0   8    25346.69    23278.72     2161.55 o  1.290687
   8   4   5    14944.99    14440.04      919.91 o  1.288556
   7   7   4     6296.21     6083.47      385.49 o  1.288511
   3  11   0     1624.34     1551.13      100.88 o  1.288385
   4   4   7    22458.16    21445.97     1395.27 o  1.288373
   3   7   6     1450.79     1410.89       85.91 o  1.288358
  -1  11   2        0.80        0.76        0.14 o  1.288354
  10   4   3     2892.49     2813.94      128.30 o  1.287020
  -4  10   3      272.31      267.03       15.04 o  1.286731
   0   6   7     8055.68     7699.53      325.51 o  1.286646
   7   3   6     1319.52     1242.56       37.02 o  1.284856
   4   8   5     4471.94     4211.12      126.94 o  1.284751
   1  11   2    30498.94    28673.78      869.91 o  1.284715
 -11   3   3    31010.34    30787.29      803.12 o  1.284447
 -10   4   4    33050.64    32793.13      857.64 o  1.284370
  -7   1   7    43270.16    42894.41     1118.39 o  1.284171
   9   1   5     3439.69     3241.68       74.32 o  1.281888
  -7   5   6        0.92        0.87        0.05 o  1.281849
   8   6   4   159869.27   150665.97     3481.18 o  1.281837
  11   3   2    71256.79    67154.70     1554.55 o  1.281816
  10   6   1    76124.75    71666.45     1652.51 o  1.281747
  -3  11   1   212154.39   199949.67     4633.70 o  1.281661
   3   5   7   240796.59   226698.84     5226.63 o  1.281626
   0  10   4    10115.24     9522.84      217.28 o  1.281619
   1   9   5    29915.34    28163.34      644.39 o  1.281616
  -7   9   2    15795.55    14870.78      341.19 o  1.281571
  -5   9   4    44973.93    42517.01      975.61 o  1.281481
  -2   6   7    63396.04    59932.72     1373.76 o  1.281385
  -1   3   8    31730.57    29997.13      689.23 o  1.281364
  12   0   0      421.54      402.98        8.97 o  1.280775
 -10   6   2       61.20       58.63        1.87 o  1.280623
  -6   6   6     7126.29     6850.42      154.16 o  1.280382
  -4   0   8     1675.49     1612.78       36.81 o  1.280294
   6   8   4    11843.09    11460.91      366.94 o  1.276377
   5   3   7       10.60       10.26        0.61 o  1.276317
   3  11   1     3537.70     3423.54      109.94 o  1.276297
  10   2   4     9531.35     9811.34      490.97 o  1.271440
   8   8   2    17534.57    18049.65      905.80 o  1.271329
   6  10   0    28155.12    28982.20     1459.52 o  1.271239
  -2  10   4    14965.47    14903.17      726.99 o  1.271121
   0   8   6     6309.97     6283.70      307.47 o  1.271093
   2   2   8    30754.03    30625.99     1504.22 o  1.271087
 -11   1   4    56038.59    57211.29     2077.77 o  1.268232
 -10   2   5    33484.36    35068.12     1325.73 o  1.268157
  -9   1   6    28025.81    29351.39     1109.38 o  1.268086
   9   7   2    18896.00    19282.13      710.99 o  1.267525
  -6  10   1    16088.60    16417.36      607.55 o  1.267379
   1   3   8     3494.99     3531.25      127.74 o  1.267220
   4  10   3     3371.40     3363.51      118.54 o  1.265427
 -12   0   2    11236.55    11162.10      354.40 o  1.265204
  -8   4   6    25988.67    25353.82      848.97 o  1.264920
  11   1   3    27402.27    26536.19      909.22 o  1.264691
  -3   9   5    19534.85    18924.22      609.48 o  1.264313
  -2   8   6    20779.09    20129.56      649.21 o  1.264289
 -12   2   1    38272.12    36315.05     1066.01 o  1.262976
  -8   6   5    56295.53    53497.38     1611.37 o  1.262699
  -6   4   7    47428.47    45071.06     1359.01 o  1.262591
  12   2   0     7258.64     6653.82      201.37 o  1.261616
 -11   5   1    38943.29    35698.36     1094.27 o  1.261541
  -9   7   3    24858.49    22767.67      708.00 o  1.261405
  -7   7   5     4605.22     4201.26      127.62 o  1.261291
  -5   5   7    13617.25    12434.52      385.96 o  1.261196
  -4   2   8    48494.63    44283.00     1424.55 o  1.261156
  11   5   0     4780.64     4335.08      133.64 o  1.261041
  -8   8   3    17670.69    15951.57      505.08 o  1.260850
  -5   7   6     1676.90     1511.65       46.87 o  1.260705
  -3   3   8    17542.74    15868.13      511.29 o  1.260634
   8   0   6    31117.29    27243.48     1267.89 o  1.257489
   2  10   4      433.52      374.40       20.46 o  1.257310
   9   5   4      572.59      494.51       25.87 o  1.257204
   7   9   2     3503.85     3017.00      155.15 o  1.257109
   6  10   1     7964.40     6857.77      355.10 o  1.257069
  -3  11   2     2311.48     2008.14      111.07 o  1.256981
   3   1   8    12204.50    10543.47      542.12 o  1.256940
   2   6   7      817.48      703.89       35.68 o  1.256934
   6   2   7    33425.43    34052.30     1425.30 o  1.246975
   5   9   4    16086.69    16402.19      683.64 o  1.246963
   3  11   2    70352.79    71732.59     3006.39 o  1.246920
 -12   2   2     2663.96     2750.91      103.11 o  1.246726
  -9   5   5     3188.34     3230.86      129.59 o  1.246514
  -7   3   7       37.48       38.68        2.82 o  1.246398
  10   6   2      834.53      849.83       30.54 o  1.246172
  -6  10   2    22214.02    22580.83      802.13 o  1.245972
   0   4   8    30270.94    30369.61     1032.79 o  1.245819
 -11   5   2     3207.22     3194.42       97.48 o  1.244520
 -10   6   3      186.11      184.48        5.64 o  1.244452
   9   3   5    57762.34    57070.80     1769.31 o  1.244311
  -5   1   8     3581.00     3535.77      111.42 o  1.244181
  -1  11   3    11857.61    11707.83      363.79 o  1.244072
   2   8   6    48396.89    47116.30     1457.70 o  1.244063
  11   5   1    59639.82    57592.64     1803.86 o  1.243083
  -7   9   3    66711.91    65062.68     2027.66 o  1.242854
  12   2   1    17809.41    17369.13      534.40 o  1.242812
  -2   4   8    37961.62    36921.84     1148.10 o  1.242678
  -6   8   5     1037.70     1009.45       35.15 o  1.242461
  -4   6   7     1748.39     1700.80       52.15 o  1.242384
   8   2   6     5777.49     5884.19      290.27 o  1.239341
   3   9   5     2742.57     2852.80      148.01 o  1.239179
   1  11   3       18.67       19.42        2.21 o  1.239165
 -11   3   4     2975.19     3483.16      824.60 o  1.231809
  -9   3   6     9009.76    10469.40     2503.33 o  1.231675
  11   3   3     1123.41      958.34       86.64 o  1.228563
  -4  10   4     9137.47     7635.05      627.33 o  1.228244
  -1   7   7    11070.34     9150.39      712.56 o  1.228178
   6  10   2    70795.44    57030.70     3967.51 o  1.226599
   4   0   8    50680.62    40871.67     2859.69 o  1.226501
  12   0   2       34.51       29.15        4.49 o  1.225610
  -4   8   6      325.93      280.93       18.90 o  1.225209
   8   8   3    53079.87    53777.29     2070.58 o  1.221650
   5  11   0    89644.23    90501.77     3562.49 o  1.221541
   3   3   8    25293.82    25626.15      989.43 o  1.221454
   6   6   6    60616.50    65172.03     2299.69 o  1.220320
   0  12   0    21583.75    22959.48      840.19 o  1.220236
  10   4   4    27282.83    35911.28     1183.80 o  1.217554
   9   7   3     1024.60     1348.64       45.76 o  1.217503
  -5  11   1      214.61      283.62        9.28 o  1.217344
  -3  11   3     8561.92    11315.45      375.75 o  1.217293
   2   4   8     8989.09    11384.72      358.18 o  1.217244
   1   7   7    10713.67    13568.91      428.76 o  1.217245
 -12   2   3   141866.05   162470.39     4098.70 o  1.214807
 -10   4   5   143203.05   166950.59     4314.73 o  1.214670
  -8   2   7   218015.67   247254.12     6326.73 o  1.214551
   7   5   6    17662.71    18360.62      447.94 o  1.212349
   5   7   6    63489.70    65501.85     1583.08 o  1.212280
   0  12   1     2396.86     2452.48       60.62 o  1.212229
 -11   5   3   195239.81   198714.72     4774.34 o  1.212005
  -6   0   8   142137.62   141853.38     3463.62 o  1.211727
 -12   4   1    64845.22    61429.50     1464.31 o  1.210115
  -9   7   4    74636.34    70787.02     1701.37 o  1.209926
  11   5   2      400.53      378.27        9.11 o  1.209794
   7   9   3     5139.20     4853.54      119.92 o  1.209773
  -5   3   8   121211.71   115340.32     2819.14 o  1.209736
   5  11   1    15306.67    14455.87      354.92 o  1.209709
   4   2   8     3839.87     3626.43       88.26 o  1.209645
  -6  10   3     6436.39     5995.52      147.76 o  1.209548
  -1   5   8     6829.05     6361.28      157.93 o  1.209414
  12   4   0     7129.61     6561.96      163.66 o  1.208919
  12   2   2    66462.56    60522.09     1510.99 o  1.208790
  -8   8   4     1565.80     1421.22       36.60 o  1.208681
  -4   4   8     1701.39     1535.03       39.32 o  1.208514
  -5   9   5    91241.41    82300.06     2099.42 o  1.208437
  -3   7   7    52618.12    47461.73     1210.95 o  1.208377
   7   7   5      107.01       98.39        3.87 o  1.205250
   5   5   7      537.39      494.08       17.51 o  1.205168
   2  12   0        0.31        0.29        0.12 o  1.205138
   0  10   5     2895.16     2654.61       83.90 o  1.204800
   7   1   7    55694.41    50882.29     1733.31 o  1.203742
   4  10   4   120913.74   112373.41     3914.21 o  1.203669
   3  11   3    67374.67    62615.91     2181.98 o  1.203654
 -11   1   5     1109.17     1082.22       46.41 o  1.201733
 -10   0   6      282.88      276.01       13.70 o  1.201668
   8   6   5     6821.47     5797.08      363.12 o  1.199045
   4   6   7       48.61       41.31        3.35 o  1.198897
  -2  12   1      366.40      297.74       20.21 o  1.198892
  11   1   4    12756.54    11478.98      591.47 o  1.197862
  10   6   3     7683.71     6914.19      356.04 o  1.197807
  -5  11   2      775.65      703.73       37.02 o  1.197602
  -2  10   5     1827.51     1647.82       82.40 o  1.197531
  -1   9   6     4026.64     3630.71      180.46 o  1.197517
   1   5   8      404.50      364.73       19.99 o  1.197500
   6   8   5    74036.60    65543.98     3155.74 o  1.196033
   6   4   7    24533.16    21812.38     1062.62 o  1.196018
   2  12   1    75339.95    68008.51     3304.30 o  1.195958
 -12   4   2      179.53      160.57        7.39 o  1.195798
 -10   6   4      857.73      782.12       38.81 o  1.195670
  -6   2   8      248.01      230.36       11.49 o  1.195465
  12   4   1     7703.37     6682.59      511.36 o  1.192344
  -7   9   4     2085.35     1817.71      138.70 o  1.192075
  -3   5   8      461.09      400.57       33.48 o  1.191938
   8   4   6      268.05      235.59       23.73 o  1.189278
   4   8   6     2680.97     2385.34      225.41 o  1.189148
   0  12   2     1870.02     1629.43      161.70 o  1.189123
  10   2   5     4427.31     3939.10      365.95 o  1.189083
  -1  11   4    56090.61    50242.52     4685.16 o  1.188820
   1   9   6     8928.78     7997.86      748.29 o  1.188808
 -12   0   4     2793.53     4391.90      292.93 o  1.185932
 -10   2   6    10987.84    19166.20     1415.89 o  1.185802
   9   1   6    29329.39    40186.09     1995.10 o  1.183321
   6  10   3      562.82      771.15       37.27 o  1.183216
   5  11   2    16658.03    20213.54      974.56 o  1.183189
   5   1   8     9096.26    10978.09      534.44 o  1.183155
   2  10   5    30462.84    36764.98     1792.54 o  1.183121
   1  11   4    21092.02    25455.53     1240.64 o  1.183118
 -13   1   1   143831.05   138862.23     4314.93 o  1.180229
  -8   6   6    92475.96    88606.52     2777.81 o  1.179930
  -7   5   7   141462.62   135067.61     4245.59 o  1.179883
  13   1   0     1502.43     1426.98       43.75 o  1.178419
   9   5   5     2110.63     1969.85       64.38 o  1.178112
  -7   7   6    13800.81    12880.26      425.27 o  1.178081
  -6   6   7      790.24      737.53       24.04 o  1.178040
   9   9   0      175.52      162.27        5.25 o  1.177952
  -2  12   2     1223.79     1123.20       40.18 o  1.177920
   3   7   7        3.27        2.97        0.15 o  1.177908
  -3   9   6      451.55      409.30       14.20 o  1.177742
  10   8   0      217.56      182.36        9.24 o  1.177014
  -9   9   1    10992.38     9225.68      381.77 o  1.176964
 -10   8   1      120.75      102.14        4.49 o  1.176724
  -1   1   9     3468.93     2985.02      133.70 o  1.176708
   7   3   7    30345.81    27052.95     2287.55 o  1.172466
   5   9   5    38620.11    34429.39     2913.51 o  1.172416
   2  12   2     6014.20     5401.29      462.03 o  1.172373
 -12   2   4     1616.65     1541.45      115.76 o  1.170673
 -11   3   5     9661.18     9123.40      722.28 o  1.170609
  -9   1   7      153.40      145.10       14.83 o  1.170492
 -13   1   2     7250.70     6840.43      377.44 o  1.167615
 -12   4   3      160.22      149.90        9.87 o  1.167548
 -11   5   4      672.62      630.50       42.09 o  1.167485
  -9   5   6     5529.16     5117.12      337.09 o  1.167371
  -8   4   7     1074.68      994.60       65.17 o  1.167320
  -7   1   8     1442.75     1341.30       93.03 o  1.167273
  11   3   4     2874.67     2711.71      135.34 o  1.167029
  -3  11   4      303.03      284.97       14.26 o  1.166742
   0   8   7       17.95       17.28        0.79 o  1.166700
  11   5   3    47144.34    47708.16     1271.88 o  1.164720
   9   9   1    19093.48    19128.01      494.25 o  1.164622
   8  10   0    13664.66    13689.37      356.56 o  1.164580
  -5  11   3    86511.62    87583.34     2340.28 o  1.164475
   0   6   8   103690.48   102229.83     2585.89 o  1.164381
   1   1   9     8563.92     8443.28      214.68 o  1.164375
  12   2   3    66347.35    63909.10     1524.08 o  1.163151
   8   8   4    29012.12    27942.82      669.12 o  1.163111
  10   8   1    26374.01    25401.95      606.93 o  1.163043
   4  12   0    32793.08    31594.28      761.79 o  1.162997
   4   4   8    34903.64    33415.57      799.84 o  1.162963
  -8  10   1    29989.16    28710.61      683.03 o  1.162952
  -4  10   5    58891.64    56389.97     1349.75 o  1.162817
  -2   8   7   117817.86   112592.57     2681.49 o  1.162773
   0   2   9    96941.70    92642.26     2200.50 o  1.162746
  13   1   1    12181.42    11642.10      279.83 o  1.162380
 -11   7   1      932.03      890.76       20.93 o  1.162258
  12   4   2    56595.74    54099.94     1282.39 o  1.162203
 -10   8   2     1512.46     1445.77       35.62 o  1.162203
  -6   8   6     4301.59     4131.46       98.08 o  1.162024
  -5   7   7    19848.57    19063.58      454.74 o  1.161989
  -3   1   9       20.98       20.17        0.47 o  1.161931
  -6  10   4    77409.10    74347.66     1768.17 o  1.161922
  11   7   0   101717.57    98093.05     2343.11 o  1.161867
  -2   6   8    43855.02    42306.91     1009.70 o  1.161815
  -9   9   2    48120.99    46422.28     1099.01 o  1.161764
  -2   2   9    16763.29    16120.11      387.51 o  1.161527
   9   7   4     3950.04     3633.23      106.14 o  1.158864
  -4  12   1        0.09        0.08        0.05 o  1.158709
   3   5   8      501.74      467.59       14.02 o  1.158657
   9   3   6    11215.64     8950.42      390.23 o  1.153570
   7   9   4     1881.90     1501.81       65.80 o  1.153502
   4  12   1    15518.31    12366.42      553.91 o  1.153428
   5   3   8    56274.18    44771.65     1967.03 o  1.153417
   3   9   6    89162.62    70937.64     3116.09 o  1.153392
   0  12   3    54123.37    43060.46     1886.15 o  1.153384
   8  10   1     1805.08     1556.41       55.34 o  1.152347
   3  11   4     5469.50     4944.88      173.86 o  1.150789
 -13   3   1    73707.06    65210.48     2252.11 o  1.150705
  -9   7   5    48202.33    43332.15     1531.98 o  1.150476
  -6   4   8    69800.82    63555.61     2262.82 o  1.150345
  13   3   0    17228.92    15791.99      536.89 o  1.149028
 -11   7   2      407.32      371.34       12.81 o  1.148908
  -8   8   5    10564.17     9587.54      330.82 o  1.148757
  -5   5   8      384.76      350.27       12.79 o  1.148641
  11   7   1    19847.99    17680.93      714.01 o  1.147776
  -8  10   2    39004.31    34745.69     1406.60 o  1.147635
  -1   3   9     4975.78     4458.96      179.52 o  1.147441
   5  11   3    67100.80    65334.29     1971.98 o  1.144749
   6   0   8    11802.68    11491.96      350.81 o  1.144747
  10   4   5    90640.74    88254.50     2648.23 o  1.144656
  -2  12   3   162355.44   159271.33     4777.53 o  1.144431
   2   8   7   111098.45   108988.02     3267.28 o  1.144411
 -13   1   3     8550.73     8228.57      250.31 o  1.141908
 -10   4   6      352.86      359.07       11.45 o  1.141728
  -9   3   7      704.77      714.73       23.03 o  1.141675
  10   6   4    42166.80    43396.18     1334.34 o  1.141206
  -4  12   2    27372.71    28143.40      876.33 o  1.141010
   2   6   8    21150.99    21815.03      653.80 o  1.140950
 -13   3   2   107512.27   109990.19     3132.24 o  1.139005
 -10   6   5   137774.50   141399.91     4180.96 o  1.138830
  -7   3   8    90174.22    92403.70     2741.79 o  1.138688
   9   9   2    17345.37    17845.95      524.20 o  1.138372
   7  11   0    18371.06    18934.30      548.28 o  1.138298
   2   2   9     9591.93     9916.78      289.58 o  1.138149
   8   2   7    23940.97    25102.83      724.73 o  1.136945
   4  10   5      195.27      204.53        6.16 o  1.136844
   2  12   3    23602.21    24720.84      733.03 o  1.136823
  10   8   2     2245.17     2243.63       66.72 o  1.136270
  -7  11   1    10970.44    10902.48      336.42 o  1.136151
   1   3   9    20914.11    20746.27      646.16 o  1.135997
 -12   6   1    12954.52    13110.69      404.15 o  1.135074
 -10   8   3    20222.52    20576.34      631.56 o  1.134966
  -4   2   9    24636.23    25103.53      794.00 o  1.134731
  13   3   1    24091.63    24219.39      789.02 o  1.134144
  12   6   0    25520.86    25656.18      839.35 o  1.134086
  -9   9   3    18708.23    18890.68      629.70 o  1.133933
  -7   9   5       46.24       46.79        1.91 o  1.133849
  13   1   2    53827.38    53911.32     1821.04 o  1.133779
  -4   6   8     3128.54     3133.42      105.44 o  1.133752
  -3   3   9    28134.88    27929.79      989.29 o  1.133727
  -5   9   6    29174.88    28933.41      984.34 o  1.133424
  -4   8   7     4484.63     4447.51      150.77 o  1.133396
 -11   1   6      586.11      589.39       25.74 o  1.131583
   6  10   4    10836.57    10950.43      497.95 o  1.131029
   6   2   8    28940.59    29244.67     1331.52 o  1.131006
   4  12   2    10991.63    11107.12      505.21 o  1.130989
 -12   4   4      747.02      785.25       32.51 o  1.128205
  -8   0   8     3849.61     4059.51      161.46 o  1.127996
  11   1   5    81630.56    85641.21     3297.61 o  1.127634
   8  10   2    61192.02    64320.57     2453.73 o  1.127512
   7  11   1    41642.61    43771.65     1668.04 o  1.127479
  -1  11   5     8977.15     9443.25      360.12 o  1.127356
   0  10   6    43517.81    45777.25     1756.73 o  1.127348
   3   1   9    21658.58    22783.09      872.96 o  1.127347
   7   7   6    28956.59    27134.43      898.87 o  1.123452
   6   6   7    11779.30    11038.07      365.33 o  1.123415
   1  13   0    14794.93    13866.15      458.41 o  1.123359
 -12   6   2     4995.14     4686.99      150.13 o  1.123233
 -11   7   3     1836.83     1723.51       55.17 o  1.123178
  -5   1   9     8407.67     7681.22      243.98 o  1.122923
  12   0   4    36623.43    33683.75     1046.11 o  1.122923
  -2  10   6   141224.42   127737.15     3927.80 o  1.122593
  10   0   6   167573.80   150523.55     4516.49 o  1.121504
  12   4   3     4510.23     4051.32      123.53 o  1.121468
  11   7   2    15602.80    13971.50      415.67 o  1.121418
   1  11   5   170506.22   152679.58     4537.89 o  1.121284
  -7  11   2     4957.04     4425.85      132.19 o  1.121254
  -5  11   4     5684.77     5075.60      152.41 o  1.121193
  -1   7   8       50.93       45.20        1.62 o  1.121115
   0   4   9      405.26      359.62       12.08 o  1.121104
  12   6   1    20585.58    18370.04      564.12 o  1.120369
  -8  10   3    26993.35    24143.74      744.10 o  1.120183
  -2   4   9    23257.94    20867.98      655.33 o  1.120012
 -12   2   5     2519.10     2363.54       91.16 o  1.118362
   8   6   6     7367.02     6741.48      297.46 o  1.117824
   5   7   7     7089.97     6500.01      284.92 o  1.117730
  -1  13   1      504.85      464.61       21.61 o  1.117699
   7   5   7     1852.93     1871.16      111.36 o  1.116592
   6   8   6     9993.41    10091.72      589.66 o  1.116570
   1  13   1     5296.06     5577.49      350.35 o  1.116508
 -13   3   3     2002.13     2694.53      228.47 o  1.115104
 -11   5   5       24.98       33.98        3.75 o  1.114988
  -8   2   8     3752.92     5173.72      582.41 o  1.114842
  11   5   4    13519.96    18948.79     2955.74 o  1.111894
  -4  12   3     1178.24     1641.11      267.52 o  1.111664
   1   7   8     8161.33    10493.48     1689.51 o  1.111605
  12   2   4      204.26      212.60       25.56 o  1.109944
  -3  11   5      275.56      250.87       28.20 o  1.109641
  -1   9   7     7015.03     6386.44      697.88 o  1.109612
  10   2   6     5636.58     5578.46      480.24 o  1.108573
   0  12   4     2668.07     2681.55      228.36 o  1.108363
   2  10   6    25765.66    25895.82     2190.55 o  1.108362
  13   3   2    39711.77    41580.14     2954.59 o  1.107531
  -6  10   5       31.29       33.25        2.22 o  1.107229
  -3   7   8    10140.08    10969.35      707.49 o  1.107151
 -13   1   4    12971.39    14959.66      861.50 o  1.105597
 -11   3   6    35788.27    44237.54     2608.95 o  1.105483
 -10   2   7    28502.52    35199.64     2125.10 o  1.105431
   7  11   2      995.49     1185.96       70.25 o  1.104761
  11   3   5    56510.02    61951.84     2604.69 o  1.101800
   9   9   3    51854.55    56981.61     2414.42 o  1.101721
   6  12   0     4872.34     5337.09      225.78 o  1.101628
  -2  12   4    20327.46    22266.44      946.23 o  1.101551
   3   3   9    27060.16    29488.53     1229.63 o  1.101532
   1   9   7    33414.62    36301.81     1510.09 o  1.101530
   9   5   6        3.08        3.16        0.18 o  1.100235
   8   8   5    18772.08    19255.27      699.00 o  1.100204
   5   5   8     1202.32     1211.47       42.35 o  1.100102
   3  13   0     3991.64     4080.19      150.93 o  1.100097
   4   8   7     5901.77     5946.66      209.57 o  1.100089
  -1  13   2      624.49      627.68       23.30 o  1.100078
 -12   6   3      431.12      425.09       14.64 o  1.099723
  -8   6   7       16.36       15.79        0.68 o  1.099532
  10   8   3     2713.26     2570.02       82.52 o  1.099247
  -6  12   1     2692.84     2559.33       82.89 o  1.099114
   2   4   9    16810.14    15849.21      485.50 o  1.099008
   8   4   7    85714.14    79856.77     2323.58 o  1.097924
   7   1   8    12777.47    11904.31      347.95 o  1.097885
   5  11   4     5239.08     4879.45      145.74 o  1.097856
   5   9   6    55842.87    52009.64     1520.47 o  1.097847
   4  12   3      910.21      847.73       26.24 o  1.097840
   1  13   2    71733.00    66779.84     1963.74 o  1.097810
  14   0   0     2044.45     1903.33       54.03 o  1.097807
 -13   5   1    80515.09    74933.95     2161.61 o  1.097749
 -10   8   4    26188.67    24463.81      689.40 o  1.097594
  -7   7   7     4310.50     4026.60      114.10 o  1.097470
  -5   3   9    51497.84    47862.84     1364.53 o  1.097404
  13   5   0     2545.34     2417.04       62.60 o  1.096292
  -9   9   4      313.73      296.14        8.56 o  1.096097
   9   7   5     5805.25     5466.14      145.59 o  1.096044
  -4   4   9    17179.10    16094.86      428.85 o  1.095929
  -3  13   1    26065.04    24419.96      650.55 o  1.095902
   4   6   8     4894.37     4556.42      121.16 o  1.095888
  13   1   3    22403.35    21003.06      564.66 o  1.095303
  12   6   2   101435.09    95065.58     2556.71 o  1.095252
  -7  11   3   101061.65    94691.02     2556.87 o  1.095048
  -4  10   6    20162.47    18860.64      512.34 o  1.094966
  -3   9   7    85229.73    79726.72     2157.29 o  1.094945
  -1   5   9   111976.85   104746.87     2811.97 o  1.094914
   9   1   7    10223.24     9137.61      293.25 o  1.092674
   7   9   5     5178.51     4698.28      154.87 o  1.092617
   6   4   8     2160.38     1960.03       64.87 o  1.092572
   3  13   1     5538.51     5053.21      174.76 o  1.092544
   3  11   5     1590.28     1438.79       48.53 o  1.092533
   2  12   4     5293.06     4788.84      160.51 o  1.092526
   8  10   3     3180.36     2892.30       98.91 o  1.092424
   6  12   1     9894.69     8997.48      305.56 o  1.092369
   4   2   9    31500.10    28643.78      980.59 o  1.092291
 -14   0   2    26378.30    25450.37     1140.26 o  1.090162
  -9   5   7    12098.78    10924.66      672.96 o  1.089901
 -14   2   1     2303.96     2450.17      195.50 o  1.087634
 -13   5   2     1658.81     1764.07      130.00 o  1.087577
 -11   7   4      162.74      171.74       20.48 o  1.087472
  -9   7   6       10.81       11.44        2.40 o  1.087380
  -7   5   8     3308.93     3500.55      286.25 o  1.087301
  -6   2   9     8224.28     8572.92      692.74 o  1.087266
  14   2   0    31942.01    34198.46     2212.48 o  1.085670
  -8   8   6    52852.74    55842.29     3628.41 o  1.085381
  -6   6   8    18186.37    19175.51     1231.65 o  1.085311
  11   7   3     5911.72     6233.26      402.28 o  1.085236
  -6  12   2     3340.96     3491.57      230.54 o  1.085063
   1   5   9    10982.94    11574.32      719.05 o  1.084957
  -6   8   7     5932.77     6335.84      390.25 o  1.083909
  13   5   1      608.75      613.58       40.81 o  1.083343
  -8  10   4     3143.37     3091.11      198.60 o  1.083120
  -3   5   9    14427.90    13644.47      875.11 o  1.082979
 -13   3   4     6965.83     6496.04      312.84 o  1.081217
 -12   4   5     1652.72     1532.66       75.36 o  1.081161
  -9   1   8    12629.45    11683.03      575.16 o  1.081016
  10   6   5    41484.85    38291.46     1903.07 o  1.080529
  -3  13   2   102987.56    95036.03     4855.44 o  1.080353
   3   7   8    40520.95    37423.34     1875.94 o  1.080327
 -14   2   2       75.21       70.53        4.62 o  1.078274
 -10   6   6       75.37       70.48        5.02 o  1.078065
  -8   4   8      433.59      405.54       25.98 o  1.077980
   7   3   8    27310.21    28548.20      785.97 o  1.074000
   6  10   5    51248.48    53571.59     1479.53 o  1.073991
   3  13   2    30302.21    31269.45      892.60 o  1.073946
  12   4   4    26577.34    27456.24      727.13 o  1.073550
  -4  12   4    22511.09    23237.81      607.25 o  1.073294
   0   8   8    52587.20    54316.73     1403.86 o  1.073242
 -12   0   6   213059.61   220383.06     5652.12 o  1.073016
  14   2   1    57382.32    58667.36     1489.69 o  1.072562
  10   4   6    69054.58    69542.48     1762.45 o  1.072310
  -7   9   6   112068.05   112859.85     2854.03 o  1.072254
   7  11   3    30495.97    30640.98      774.62 o  1.072220
   6  12   2    14731.46    14801.51      375.46 o  1.072196
  -5   7   8   137903.61   138559.34     3510.92 o  1.072194
   5   1   9    42334.53    42479.94     1067.75 o  1.072141
  -1  13   3    35269.52    35321.58      905.43 o  1.072124
   3   9   7   104279.48   104637.66     2651.41 o  1.072123
  13   3   3    22780.67    23002.91      575.39 o  1.071583
  -5  11   5    18683.01    19149.12      483.09 o  1.071290
  -2   8   8    27681.23    28411.53      712.90 o  1.071231
 -10   4   7     2252.51     2231.88       67.11 o  1.069466
   9   3   7    34502.41    33602.00     1046.04 o  1.069120
   4  10   6     9594.00     9410.99      297.60 o  1.068997
   1  13   3     1335.06     1317.44       42.45 o  1.068979
 -13   5   3    10049.14     8607.89      660.06 o  1.066711
 -12   6   4     5152.33     4242.95      370.94 o  1.066659
  -7   1   9      499.18      393.62       38.74 o  1.066446
  -1  11   6     1592.10     1299.26      209.13 o  1.063659
 -13   1   5     1462.48     1358.96       72.62 o  1.061728
 -12   2   6     2343.54     2168.44      122.13 o  1.061675
 -11   1   7    12810.65    11878.28      626.05 o  1.061625
[truncated: 11,836 more chars]
